# Supplementary material for: Identification and comparison of key RNA interference machinery from western corn rootworm, fall armyworm, and southern green stink bug
Source: PLoS One. 2018 Sep 5;13(9):e0203160. doi: 10.1371/journal.pone.0203160 (PMC6124762; doi:10.1371/journal.pone.0203160)
Supplement: S1 File — (XLSX) [file pone.0203160.s011.xlsx]

## Sheet: Genome - corn 3.0
tBLASTx against sfru_Corn_variant_assembly_3.0, BLOSUM80 scoring matrix, otherwise default settings
http://bipaa.genouest.org/blast/sfru/
Query	Sequence hits	Positives (%)	No. Identities	No. Differences	Gaps	Query start	Query End	Subject Start	Subject End	E-value	Score (Bits)
Drosha-PA	scaffold_160	91.18	170	15	0	610	101	169304	168795	0	423
Drosha-PA	scaffold_160	99.25	134	1	0	3805	4206	179784	180185	0	369
Drosha-PA	scaffold_160	95.33	150	7	0	3	452	168697	169146	0	350
Drosha-PA	scaffold_160	86.57	134	18	0	4206	3805	180185	179784	0	298
Drosha-PA	scaffold_160	96.19	105	4	0	501	187	169195	168881	0	295
Drosha-PA	scaffold_160	92.31	117	9	0	224	574	168918	169268	0	294
Drosha-PA	scaffold_160	86.47	133	18	0	3806	4204	179785	180183	0	291
Drosha-PA	scaffold_160	86.05	129	18	0	3807	4193	179786	180172	0	283
Drosha-PA	scaffold_160	95.92	98	4	0	952	659	169646	169353	0	263
Drosha-PA	scaffold_160	96.94	98	3	0	659	952	169353	169646	0	262
Drosha-PA	scaffold_160	98.89	90	1	0	909	640	169603	169334	0	244
Drosha-PA	scaffold_160	93.26	89	6	0	2383	2649	175042	175308	0	241
Drosha-PA	scaffold_160	97.56	82	2	0	2627	2382	175286	175041	0	212
Drosha-PA	scaffold_160	87.8	82	10	0	2870	2625	176167	175922	0	208
Drosha-PA	scaffold_160	100	74	0	0	2626	2847	175923	176144	0	202
Drosha-PA	scaffold_160	98.57	70	1	0	1030	1239	170267	170476	0	201
Drosha-PA	scaffold_160	100	69	0	0	1531	1737	172259	172465	0	197
Drosha-PA	scaffold_160	100	69	0	0	2179	2385	174327	174533	0	194
Drosha-PA	scaffold_160	97.18	71	2	0	1031	1243	170268	170480	0	190
Drosha-PA	scaffold_160	87.84	74	9	0	2845	2624	176142	175921	0	185
Drosha-PA	scaffold_160	97.18	71	2	0	1243	1031	170480	170268	0	184
Drosha-PA	scaffold_160	97.1	69	2	0	2384	2178	174532	174326	0	183
Drosha-PA	scaffold_160	86.67	75	10	0	2624	2848	175921	176145	0	182
Drosha-PA	scaffold_160	82.93	82	14	0	2626	2381	175285	175040	0	182
Drosha-PA	scaffold_160	81.71	82	15	0	2385	2630	175044	175289	0	181
Drosha-PA	scaffold_160	90.54	74	7	0	2847	2626	176144	175923	0	179
Drosha-PA	scaffold_160	85.54	83	12	0	2381	2629	175040	175288	0	178
Drosha-PA	scaffold_160	96.77	62	2	0	3332	3147	177766	177581	0	178
Drosha-PA	scaffold_160	85.37	82	12	0	2628	2383	175287	175042	0	177
Drosha-PA	scaffold_160	97.18	71	2	0	1032	1244	170269	170481	0	176
Drosha-PA	scaffold_160	91.3	69	6	0	2385	2179	174533	174327	0	171
Drosha-PA	scaffold_160	91.3	69	6	0	2177	2383	174325	174531	0	168
Drosha-PA	scaffold_160	82.19	73	13	0	1752	1534	172480	172262	0	167
Drosha-PA	scaffold_160	100	58	0	0	2980	3153	177036	177209	0	167
Drosha-PA	scaffold_160	96.49	57	2	0	3490	3660	178887	179057	0	166
Drosha-PA	scaffold_160	100	59	0	0	3151	3327	177585	177761	0	165
Drosha-PA	scaffold_160	100	54	0	0	3659	3498	179056	178895	0	163
Drosha-PA	scaffold_160	94.64	56	3	0	1378	1545	171721	171888	0	160
Drosha-PA	scaffold_160	95.65	69	3	0	1248	1042	170485	170279	0	157
Drosha-PA	scaffold_160	90.74	54	5	0	3496	3335	178446	178285	0	156
Drosha-PA	scaffold_160	98.31	59	1	0	2180	2004	173853	173677	0	155
Drosha-PA	scaffold_160	90.38	52	5	0	1531	1376	171874	171719	0	152
Drosha-PA	scaffold_160	87.1	62	8	0	3147	3332	177581	177766	0	151
Drosha-PA	scaffold_160	97.18	71	2	0	1235	1023	170472	170260	0	149
Drosha-PA	scaffold_160	90.16	61	6	0	3152	3334	177586	177768	0	148
Drosha-PA	scaffold_160	96.3	54	2	0	3498	3659	178895	179056	0	147
Drosha-PA	scaffold_160	100	54	0	0	3497	3336	178447	178286	0	146
Drosha-PA	scaffold_160	89.83	59	6	0	2981	3157	177037	177213	0	146
Drosha-PA	scaffold_160	80.82	73	14	0	1533	1751	172261	172479	0	145
Drosha-PA	scaffold_160	86.89	61	8	0	3334	3152	177768	177586	0	145
Drosha-PA	scaffold_160	88.52	61	7	0	3333	3151	177767	177585	0	144
Drosha-PA	scaffold_160	90.74	54	5	0	2178	2339	174326	174487	0	143
Drosha-PA	scaffold_160	92.45	53	4	0	3655	3813	179428	179586	0	142
Drosha-PA	scaffold_160	91.3	69	6	0	2383	2177	174531	174325	0	142
Drosha-PA	scaffold_160	94.44	54	3	0	3658	3497	179055	178894	0	141
Drosha-PA	scaffold_160	89.66	58	6	0	3150	2977	177206	177033	0	140
Drosha-PA	scaffold_160	92.86	56	4	0	1544	1377	171887	171720	0	139
Drosha-PA	scaffold_160	87.27	55	7	0	1377	1541	171720	171884	0	137
Drosha-PA	scaffold_160	98.28	58	1	0	2005	2178	173678	173851	0	137
Drosha-PA	scaffold_160	90.2	51	5	0	2026	1874	173442	173290	0	136
Drosha-PA	scaffold_160	87.72	57	7	0	3327	3497	178277	178447	0	136
Drosha-PA	scaffold_160	92	50	4	0	2845	2994	176545	176694	0	133
Drosha-PA	scaffold_160	94	50	3	0	2996	2847	176696	176547	0	133
Drosha-PA	scaffold_160	92	50	4	0	2028	1879	173444	173295	0	127
Drosha-PA	scaffold_160	93.75	48	3	0	1871	2014	173287	173430	0	127
Drosha-PA	scaffold_160	97.78	45	1	0	1879	2013	173295	173429	0	126
Drosha-PA	scaffold_160	98.28	58	1	0	3152	2979	177208	177035	0	124
Drosha-PA	scaffold_160	90.57	53	5	0	1533	1375	171876	171718	0	124
Drosha-PA	scaffold_160	90	50	5	0	3804	3655	179577	179428	0	123
Drosha-PA	scaffold_160	93.48	46	3	0	2983	2846	176683	176546	0	123
Drosha-PA	scaffold_160	88	50	6	0	3654	3803	179427	179576	0	123
Drosha-PA	scaffold_160	97.78	45	1	0	2015	1881	173431	173297	0	122
Drosha-PA	scaffold_160	100	44	0	0	1881	2012	173297	173428	0	122
Drosha-PA	scaffold_160	93.48	46	3	0	2846	2983	176546	176683	0	122
Drosha-PA	scaffold_160	91.3	46	4	0	1241	1378	170802	170939	0	119
Drosha-PA	scaffold_160	78.95	57	12	0	2010	2180	173683	173853	0	118
Drosha-PA	scaffold_160	93.33	45	3	0	2847	2981	176547	176681	0	118
Drosha-PA	scaffold_160	88	50	6	0	2994	2845	176694	176545	0	117
Drosha-PA	scaffold_160	78.57	56	12	0	2176	2009	173849	173682	0	115
Drosha-PA	scaffold_160	78.57	56	12	0	2009	2176	173682	173849	0	114
Drosha-PA	scaffold_160	91.11	45	4	0	1377	1243	170938	170804	0	111
Drosha-PA	scaffold_160	98.25	57	1	0	950	780	169644	169474	0	111
Drosha-PA	scaffold_160	88	50	6	0	3656	3805	179429	179578	0	111
Drosha-PA	scaffold_160	79.59	49	10	0	1607	1753	172335	172481	0	109
Drosha-PA	scaffold_160	97.67	43	1	0	822	950	169516	169644	0	108
Drosha-PA	scaffold_160	83.72	43	7	0	1882	1754	173014	172886	0	101
Drosha-PA	scaffold_160	100	38	0	0	752	639	169446	169333	0	100
Drosha-PA	scaffold_160	100	38	0	0	416	303	169110	168997	0	100
Drosha-PA	scaffold_160	100	36	0	0	3660	3553	179057	178950	0	98.5
Drosha-PA	scaffold_160	83.72	43	7	0	1755	1883	172887	173015	0	93
Drosha-PA	scaffold_160	96.67	30	1	0	946	1035	169774	169863	0	91.6
Drosha-PA	scaffold_160	91.18	34	3	0	2745	2846	176042	176143	0	91.6
Drosha-PA	scaffold_160	97.06	34	1	0	3758	3657	179531	179430	0	91.1
Drosha-PA	scaffold_160	97.67	43	1	0	660	788	169354	169482	0	90.6
Drosha-PA	scaffold_160	100	49	0	0	3352	3498	178302	178448	0	90.6
Drosha-PA	scaffold_160	96.67	30	1	0	1801	1890	172933	173022	0	89.6
Drosha-PA	scaffold_160	88.57	35	4	0	1336	1232	170897	170793	0	89.1
Drosha-PA	scaffold_160	90.91	33	3	0	3754	3656	179527	179429	0	85.1
Drosha-PA	scaffold_160	100	29	0	0	3572	3658	178969	179055	0	83.6
Drosha-PA	scaffold_160	100	30	0	0	4205	4116	180184	180095	0	83.2
Drosha-PA	scaffold_160	93.94	33	2	0	1736	1638	172464	172366	0	83.2
Drosha-PA	scaffold_160	100	28	0	0	1883	1800	173015	172932	0	82.7
Drosha-PA	scaffold_160	100	26	0	0	1300	1377	170861	170938	0	81.7
Drosha-PA	scaffold_160	93.75	32	2	0	1439	1534	171782	171877	0	81.7
Drosha-PA	scaffold_160	100	28	0	0	1031	948	169859	169776	0	80.2
Drosha-PA	scaffold_160	93.75	32	2	0	1242	1337	170803	170898	0	79.2
Drosha-PA	scaffold_160	92.59	27	2	0	4120	4040	180099	180019	0	76.7
Drosha-PA	scaffold_160	100	28	0	0	950	1033	169778	169861	0	76.7
Drosha-PA	scaffold_160	100	24	0	0	622	693	169316	169387	0	75.7
Drosha-PA	scaffold_160	100	25	0	0	877	951	169571	169645	0	74.2
Drosha-PA	scaffold_160	96.3	27	1	0	4070	3990	180049	179969	0	72.3
Drosha-PA	scaffold_160	100	27	0	0	1030	950	169858	169778	0	70.3
Drosha-PA	scaffold_160	100	22	0	0	211	276	168905	168970	0	69.8
Drosha-PA	scaffold_160	88.89	27	3	0	1802	1882	172934	173014	0	67.8
Drosha-PA	scaffold_160	78.57	28	6	0	2625	2708	175922	176005	0	67.3
Drosha-PA	scaffold_160	89.47	38	4	0	3970	3857	179949	179836	0	65.3
Drosha-PA	scaffold_160	100	21	0	0	739	801	169433	169495	0	64.8
Drosha-PA	scaffold_160	91.23	57	5	0	3151	2981	177207	177037	0	63.4
Drosha-PA	scaffold_160	76.32	38	9	0	1753	1640	172481	172368	0	63.4
Drosha-PA	scaffold_160	100	24	0	0	1601	1530	172329	172258	0	63.4
Drosha-PA	scaffold_160	100	21	0	0	2982	3044	177038	177100	0	63.4
Drosha-PA	scaffold_160	88.89	27	3	0	1881	1801	173013	172933	0	62.9
Drosha-PA	scaffold_160	95	20	1	0	1005	946	169833	169774	0	56.4
Drosha-PA	scaffold_160	100	19	0	0	3947	3891	179926	179870	0	55.4
Drosha-PA	scaffold_160	85	20	3	0	4204	4145	180183	180124	0	54
Drosha-PA	scaffold_160	80.65	31	6	0	483	575	169177	169269	0	52.5
Drosha-PA	scaffold_160	100	16	0	0	3335	3382	178285	178332	0	52.5
Drosha-PA	scaffold_160	100	16	0	0	48	1	168742	168695	0	52
Drosha-PA	scaffold_160	75	24	6	0	2076	2005	173749	173678	0	50.5
Drosha-PA	scaffold_160	100	16	0	0	2	49	168696	168743	0	49
Drosha-PA	scaffold_160	89.47	19	2	0	3093	3149	177149	177205	0	46.5
Drosha-PA	scaffold_160	100	16	0	0	3381	3334	178331	178284	0	46
Drosha-PA	scaffold_160	70	20	6	0	2181	2122	173854	173795	0	46
Drosha-PA	scaffold_160	100	16	0	0	49	2	168743	168696	0	44.6
Drosha-PA	scaffold_160	100	15	0	0	951	995	169779	169823	0	43.6
Drosha-PA	scaffold_160	86.67	15	2	0	3495	3451	178445	178401	0	34.2
Drosha-PA	scaffold_160	76.92	13	3	0	134	172	168828	168866	0	32.2
Drosha-PA	scaffold_160	100	10	0	0	1322	1293	170883	170854	0	31.2
Drosha-PA	scaffold_160	51.52	33	16	0	2698	2796	177669	177767	0.002	44.6
Drosha-PA	scaffold_160	59.09	22	9	0	1469	1534	53038	53103	0.002	34.2
Drosha-PA	scaffold_160	53.33	30	14	0	3235	3324	175995	176084	0.036	43.6
Drosha-PA	scaffold_2921	98.51	134	2	0	3805	4206	25504	25103	0	367
Drosha-PA	scaffold_2921	88.06	134	16	0	4206	3805	25103	25504	0	310
Drosha-PA	scaffold_2921	88.72	133	15	0	3806	4204	25503	25105	0	307
Drosha-PA	scaffold_2921	87.6	129	16	0	3807	4193	25502	25116	0	284
Drosha-PA	scaffold_2921	95.4	87	4	0	2383	2643	30408	30148	0	237
Drosha-PA	scaffold_2921	100	81	0	0	2627	2385	30164	30406	0	219
Drosha-PA	scaffold_2921	92.5	80	6	0	2864	2625	29421	29660	0	215
Drosha-PA	scaffold_2921	89.02	82	9	0	2629	2384	30162	30407	0	203
Drosha-PA	scaffold_2921	100	74	0	0	2626	2847	29659	29438	0	202
Drosha-PA	scaffold_2921	90.12	81	8	0	2385	2627	30406	30164	0	197
Drosha-PA	scaffold_2921	100	69	0	0	1531	1737	36454	36248	0	197
Drosha-PA	scaffold_2921	91.46	82	7	0	2384	2629	30407	30162	0	195
Drosha-PA	scaffold_2921	100	69	0	0	2179	2385	32066	31860	0	194
Drosha-PA	scaffold_2921	91.89	74	6	0	1752	1531	36233	36454	0	194
Drosha-PA	scaffold_2921	91.89	74	6	0	2845	2624	29440	29661	0	192
Drosha-PA	scaffold_2921	90.24	82	8	0	2628	2383	30163	30408	0	190
Drosha-PA	scaffold_2921	91.89	74	6	0	2627	2848	29658	29437	0	188
Drosha-PA	scaffold_2921	97.1	69	2	0	2384	2178	31861	32067	0	183
Drosha-PA	scaffold_2921	91.89	74	6	0	2847	2626	29438	29659	0	179
Drosha-PA	scaffold_2921	96.77	62	2	0	3332	3147	27575	27760	0	178
Drosha-PA	scaffold_2921	90.54	74	7	0	1530	1751	36455	36234	0	172
Drosha-PA	scaffold_2921	91.3	69	6	0	2385	2179	31860	32066	0	171
Drosha-PA	scaffold_2921	91.3	69	6	0	2177	2383	32068	31862	0	168
Drosha-PA	scaffold_2921	93.33	60	4	0	3481	3660	26422	26243	0	168
Drosha-PA	scaffold_2921	100	58	0	0	2980	3153	28373	28200	0	167
Drosha-PA	scaffold_2921	100	59	0	0	3151	3327	27756	27580	0	165
Drosha-PA	scaffold_2921	100	54	0	0	3659	3498	26244	26405	0	163
Drosha-PA	scaffold_2921	96.72	61	2	0	2186	2004	32449	32631	0	156
Drosha-PA	scaffold_2921	88.89	54	6	0	3496	3335	26767	26928	0	153
Drosha-PA	scaffold_2921	96.3	54	2	0	3498	3659	26405	26244	0	150
Drosha-PA	scaffold_2921	100	54	0	0	3497	3336	26766	26927	0	146
Drosha-PA	scaffold_2921	88.52	61	7	0	3152	3334	27755	27573	0	145
Drosha-PA	scaffold_2921	84.38	64	10	0	3342	3151	27565	27756	0	145
Drosha-PA	scaffold_2921	90.74	54	5	0	2178	2339	32067	31906	0	143
Drosha-PA	scaffold_2921	94.44	54	3	0	3658	3497	26245	26406	0	143
Drosha-PA	scaffold_2921	85.48	62	9	0	3147	3332	27760	27575	0	142
Drosha-PA	scaffold_2921	91.3	69	6	0	2383	2177	31862	32068	0	142
Drosha-PA	scaffold_2921	85.25	61	9	0	3334	3152	27573	27755	0	141
Drosha-PA	scaffold_2921	85.96	57	8	0	3643	3813	25882	25712	0	141
Drosha-PA	scaffold_2921	98.28	58	1	0	2005	2178	32630	32457	0	137
Drosha-PA	scaffold_2921	93.88	49	3	0	1607	1753	36378	36232	0	134
Drosha-PA	scaffold_2921	80.95	63	12	0	2981	3169	28372	28184	0	134
Drosha-PA	scaffold_2921	92	50	4	0	2845	2994	29024	28875	0	133
Drosha-PA	scaffold_2921	88.89	54	6	0	3336	3497	26927	26766	0	132
Drosha-PA	scaffold_2921	97.83	46	1	0	2011	1874	32905	33042	0	130
Drosha-PA	scaffold_2921	100	45	0	0	1880	2014	33036	32902	0	127
Drosha-PA	scaffold_2921	97.78	45	1	0	1879	2013	33037	32903	0	126
Drosha-PA	scaffold_2921	84.48	58	9	0	3150	2977	28203	28376	0	125
Drosha-PA	scaffold_2921	100	45	0	0	2013	1879	32903	33037	0	124
Drosha-PA	scaffold_2921	100	44	0	0	1881	2012	33035	32904	0	122
Drosha-PA	scaffold_2921	100	44	0	0	2012	1881	32904	33035	0	122
Drosha-PA	scaffold_2921	78.95	57	12	0	2010	2180	32625	32455	0	121
Drosha-PA	scaffold_2921	84	50	8	0	2996	2847	28873	29022	0	119
Drosha-PA	scaffold_2921	94.83	58	3	0	3152	2979	28201	28374	0	118
Drosha-PA	scaffold_2921	80.36	56	11	0	2176	2009	32459	32626	0	116
Drosha-PA	scaffold_2921	93.02	43	3	0	1882	1754	35640	35768	0	115
Drosha-PA	scaffold_2921	80.36	56	11	0	2009	2176	32626	32459	0	115
Drosha-PA	scaffold_2921	81.63	49	9	0	3657	3803	25868	25722	0	111
Drosha-PA	scaffold_2921	86.96	46	6	0	2846	2983	29023	28886	0	111
Drosha-PA	scaffold_2921	82	50	9	0	2994	2845	28875	29024	0	111
Drosha-PA	scaffold_2921	84.78	46	7	0	2983	2846	28886	29023	0	110
Drosha-PA	scaffold_2921	69.49	59	18	0	2847	3023	29022	28846	0	109
Drosha-PA	scaffold_2921	93.02	43	3	0	1755	1883	35767	35639	0	107
Drosha-PA	scaffold_2921	81.25	48	9	0	3804	3661	25721	25864	0	105
Drosha-PA	scaffold_2921	97.22	36	1	0	3660	3553	26243	26350	0	96
Drosha-PA	scaffold_2921	94.12	34	2	0	2745	2846	29540	29439	0	91.1
Drosha-PA	scaffold_2921	100	49	0	0	3352	3498	26911	26765	0	90.6
Drosha-PA	scaffold_2921	94.12	34	2	0	3758	3657	25767	25868	0	90.6
Drosha-PA	scaffold_2921	89.74	39	4	0	1753	1637	36232	36348	0	88.6
Drosha-PA	scaffold_2921	81.25	48	9	0	3662	3805	25863	25720	0	88.1
Drosha-PA	scaffold_2921	100	33	0	0	1736	1638	36249	36347	0	88.1
Drosha-PA	scaffold_2921	93.33	30	2	0	1801	1890	35721	35632	0	87.1
Drosha-PA	scaffold_2921	100	30	0	0	4205	4116	25104	25193	0	83.2
Drosha-PA	scaffold_2921	100	28	0	0	1883	1800	35639	35722	0	82.7
Drosha-PA	scaffold_2921	96.55	29	1	0	3572	3658	26331	26245	0	81.2
Drosha-PA	scaffold_2921	92.59	27	2	0	4120	4040	25189	25269	0	76.2
Drosha-PA	scaffold_2921	92.86	28	2	0	1802	1885	35720	35637	0	75.7
Drosha-PA	scaffold_2921	85.71	28	4	0	2625	2708	29660	29577	0	70.8
Drosha-PA	scaffold_2921	96.3	27	1	0	4070	3990	25239	25319	0	70.8
Drosha-PA	scaffold_2921	96.3	27	1	0	1881	1801	35641	35721	0	70.8
Drosha-PA	scaffold_2921	100	24	0	0	1601	1530	36384	36455	0	63.4
Drosha-PA	scaffold_2921	85.96	57	8	0	3151	2981	28202	28372	0	60.4
Drosha-PA	scaffold_2921	84.21	38	6	0	3970	3857	25339	25452	0	59.9
Drosha-PA	scaffold_2921	75	32	8	0	3754	3659	25771	25866	0	57.9
Drosha-PA	scaffold_2921	100	19	0	0	3947	3891	25362	25418	0	55.4
Drosha-PA	scaffold_2921	85	20	3	0	4204	4145	25105	25164	0	54
Drosha-PA	scaffold_2921	93.75	16	1	0	3335	3382	26928	26881	0	50.5
Drosha-PA	scaffold_2921	66.67	21	7	0	2181	2119	32454	32516	0	48.5
Drosha-PA	scaffold_2921	70.83	24	7	0	2076	2005	32559	32630	0	45.5
Drosha-PA	scaffold_2921	85	20	3	0	3093	3152	28260	28201	0	45.1
Drosha-PA	scaffold_2921	93.75	16	1	0	3381	3334	26882	26929	0	43.6
Drosha-PA	scaffold_2921	86.67	15	2	0	3495	3451	26768	26812	0	34.2
Drosha-PA	scaffold_2921	92.31	13	1	0	1532	1570	36453	36415	0	32.7
Drosha-PA	scaffold_2921	85.71	14	2	0	3455	3496	26808	26767	0	29.7
Drosha-PA	scaffold_2921	100	7	0	0	3830	3810	25479	25499	0	28.7
Drosha-PA	scaffold_2921	90.48	21	2	0	2982	3044	28371	28309	2e-06	57.4
Drosha-PA	scaffold_2921	51.52	33	16	0	2698	2796	27672	27574	0.018	44.6
Drosha-PA	scaffold_2921	53.33	30	14	0	3235	3324	29587	29498	0.036	43.6
Drosha-PA	scaffold_9845	91.76	170	14	0	610	101	1631	2140	0	429
Drosha-PA	scaffold_9845	95.92	98	4	0	952	659	1289	1582	0	263
Drosha-PA	scaffold_9845	94.37	71	4	0	1243	1031	445	657	0	180
Drosha-PA	scaffold_9845	96.43	28	1	0	1031	948	1076	1159	0	77.7
Drosha-PA	scaffold_9845	100	16	0	0	48	1	2244	2291	0	52
Drosha-PA	scaffold_9845	92.31	117	9	0	224	574	2017	1667	0	294
Drosha-PA	scaffold_9845	96.94	98	3	0	659	952	1582	1289	0	262
Drosha-PA	scaffold_9845	98.57	70	1	0	1030	1239	658	449	0	201
Drosha-PA	scaffold_9845	97.62	42	1	0	3	128	2289	2164	0	115
Drosha-PA	scaffold_9845	96.67	30	1	0	946	1035	1161	1072	0	91.6
Drosha-PA	scaffold_9845	76.92	13	3	0	134	172	2107	2069	0	32.2
Drosha-PA	scaffold_9845	95.93	123	5	0	84	452	2157	1789	0	289
Drosha-PA	scaffold_9845	94.37	71	4	0	1031	1243	657	445	0	185
Drosha-PA	scaffold_9845	97.67	43	1	0	822	950	1419	1291	0	108
Drosha-PA	scaffold_9845	100	24	0	0	622	693	1619	1548	0	75.7
Drosha-PA	scaffold_9845	89.29	28	3	0	950	1033	1157	1074	0	66.8
Drosha-PA	scaffold_9845	100	21	0	0	739	801	1502	1440	0	64.8
Drosha-PA	scaffold_9845	80.65	31	6	0	483	575	1758	1666	0	52.5
Drosha-PA	scaffold_9845	100	16	0	0	2	49	2290	2243	0	49
Drosha-PA	scaffold_9845	96.19	105	4	0	501	187	1740	2054	0	295
Drosha-PA	scaffold_9845	98.89	90	1	0	909	640	1332	1601	0	244
Drosha-PA	scaffold_9845	96.97	66	2	0	1239	1042	449	646	0	149
Drosha-PA	scaffold_9845	96.15	26	1	0	1027	950	1080	1157	0	63.4
Drosha-PA	scaffold_9845	100	16	0	0	49	2	2243	2290	0	44.6
Drosha-PA	scaffold_9845	97.18	71	2	0	1235	1023	453	665	4e-112	149
Drosha-PA	scaffold_9845	98.25	57	1	0	950	780	1291	1461	4e-112	111
Drosha-PA	scaffold_9845	100	38	0	0	752	639	1489	1602	4e-112	100
Drosha-PA	scaffold_9845	100	38	0	0	416	303	1825	1938	4e-112	100
Drosha-PA	scaffold_9845	90	20	2	0	1005	946	1102	1161	4e-112	54
Drosha-PA	scaffold_9845	94.37	71	4	0	1032	1244	656	444	5e-92	169
Drosha-PA	scaffold_9845	97.67	43	1	0	660	788	1581	1453	5e-92	90.6
Drosha-PA	scaffold_9845	100	25	0	0	877	951	1364	1290	5e-92	74.2
Drosha-PA	scaffold_9845	100	22	0	0	211	276	2030	1965	5e-92	69.8
Drosha-PA	scaffold_9845	93.33	15	1	0	951	995	1156	1112	5e-92	40.6
Drosha-PA	scaffold_9845	100	9	0	0	1	27	2291	2265	5e-92	27.7
Drosha-PA	scaffold_11	46.15	65	35	0	2698	2892	147853	148047	9e-18	81.2
Drosha-PA	scaffold_11	64.71	17	6	0	2935	2985	148090	148140	9e-18	33.2
Drosha-PA	scaffold_11	62.86	35	13	0	3220	3324	147838	147942	4e-10	56.4
Drosha-PA	scaffold_11	50	32	16	0	3457	3552	148084	148179	4e-10	46.5
Drosha-PA	scaffold_11654	43.9	41	23	0	2701	2823	4014	3892	0.017	44.1
Drosha-PA	scaffold_11654	61.54	13	5	0	3457	3495	2048	2010	0.017	26.7
Dicer-1-PA	scaffold_4700	97.73	176	4	0	4579	5106	4941	5468	0	484
Dicer-1-PA	scaffold_4700	89.06	128	14	0	4581	4964	4943	5326	0	305
Dicer-1-PA	scaffold_4700	90	80	8	0	4809	4570	5171	4932	0	197
Dicer-1-PA	scaffold_4700	93.44	61	4	0	5494	5676	9067	9249	0	167
Dicer-1-PA	scaffold_4700	98.18	55	1	0	4417	4581	3776	3940	0	156
Dicer-1-PA	scaffold_4700	100	55	0	0	5098	5262	6039	6203	0	153
Dicer-1-PA	scaffold_4700	91.8	61	5	0	5675	5493	9248	9066	0	153
Dicer-1-PA	scaffold_4700	100	52	0	0	6373	6528	17575	17730	0	145
Dicer-1-PA	scaffold_4700	100	52	0	0	6527	6372	17729	17574	0	143
Dicer-1-PA	scaffold_4700	92.73	55	4	0	5261	5097	6202	6038	0	142
Dicer-1-PA	scaffold_4700	87.72	57	7	0	5764	5934	13220	13390	0	139
Dicer-1-PA	scaffold_4700	96.15	52	2	0	5105	4950	5467	5312	0	136
Dicer-1-PA	scaffold_4700	90.57	53	5	0	5106	5264	6047	6205	0	135
Dicer-1-PA	scaffold_4700	87.04	54	7	0	6365	6526	17567	17728	0	132
Dicer-1-PA	scaffold_4700	85.19	54	8	0	4579	4418	3938	3777	0	130
Dicer-1-PA	scaffold_4700	90.74	54	5	0	4946	5107	5308	5469	0	129
Dicer-1-PA	scaffold_4700	87.23	47	6	0	5901	6041	13840	13980	0	128
Dicer-1-PA	scaffold_4700	97.78	45	1	0	6041	5907	13980	13846	0	126
Dicer-1-PA	scaffold_4700	100	45	0	0	6238	6372	16908	17042	0	126
Dicer-1-PA	scaffold_4700	87.76	49	6	0	5493	5639	9066	9212	0	123
Dicer-1-PA	scaffold_4700	89.36	47	5	0	5398	5258	6958	6818	0	118
Dicer-1-PA	scaffold_4700	88.64	44	5	0	6237	6368	16907	17038	0	108
Dicer-1-PA	scaffold_4700	97.37	38	1	0	6127	6240	16117	16230	0	103
Dicer-1-PA	scaffold_4700	96.97	33	1	0	5492	5394	8320	8222	0	98
Dicer-1-PA	scaffold_4700	100	32	0	0	5398	5493	8226	8321	0	97
Dicer-1-PA	scaffold_4700	100	47	0	0	5257	5397	6817	6957	0	92.6
Dicer-1-PA	scaffold_4700	100	31	0	0	5674	5766	12164	12256	0	92.6
Dicer-1-PA	scaffold_4700	88.1	42	5	0	4957	4832	5319	5194	0	89.1
Dicer-1-PA	scaffold_4700	96.77	31	1	0	6037	6129	15417	15509	0	88.6
Dicer-1-PA	scaffold_4700	85.96	57	8	0	5933	5763	13389	13219	0	87.1
Dicer-1-PA	scaffold_4700	75	40	10	0	6119	6238	16109	16228	0	85.6
Dicer-1-PA	scaffold_4700	93.55	31	2	0	5768	5676	12258	12166	0	85.1
Dicer-1-PA	scaffold_4700	90.62	32	3	0	5399	5494	8227	8322	0	82.7
Dicer-1-PA	scaffold_4700	96.55	29	1	0	6122	6036	15502	15416	0	81.7
Dicer-1-PA	scaffold_4700	89.13	46	5	0	5259	5396	6819	6956	0	80.7
Dicer-1-PA	scaffold_4700	81.08	37	7	0	4416	4526	3775	3885	0	78.2
Dicer-1-PA	scaffold_4700	90.32	31	3	0	6036	6128	15416	15508	0	78.2
Dicer-1-PA	scaffold_4700	87.1	31	4	0	5676	5768	12166	12258	0	71.8
Dicer-1-PA	scaffold_4700	100	45	0	0	6371	6237	17041	16907	0	70.3
Dicer-1-PA	scaffold_4700	90.48	21	2	0	6242	6180	16232	16170	0	56.9
Dicer-1-PA	scaffold_4700	90	20	2	0	5850	5909	13306	13365	0	52
Dicer-1-PA	scaffold_4700	100	16	0	0	4174	4221	3	50	0	50
Dicer-1-PA	scaffold_4700	94.12	17	1	0	4529	4579	3888	3938	0	46.5
Dicer-1-PA	scaffold_4700	100	12	0	0	5765	5800	13221	13256	0	40.6
Dicer-1-PA	scaffold_4700	75	16	4	0	4173	4220	2	49	0	40.1
Dicer-1-PA	scaffold_4700	73.33	15	4	0	4218	4174	47	3	0	32.2
Dicer-1-PA	scaffold_4700	100	54	0	0	4742	4581	5104	4943	0	155
Dicer-1-PA	scaffold_4700	89.29	56	6	0	5263	5096	6204	6037	0	142
Dicer-1-PA	scaffold_4700	90.57	53	5	0	5106	4948	5468	5310	0	133
Dicer-1-PA	scaffold_4700	88.68	53	6	0	6528	6370	17730	17572	0	131
Dicer-1-PA	scaffold_4700	83.64	55	9	0	4581	4417	3940	3776	0	130
Dicer-1-PA	scaffold_4700	80.77	52	10	0	5646	5491	9219	9064	0	115
Dicer-1-PA	scaffold_4700	87.88	33	4	0	5493	5395	8321	8223	0	81.7
Dicer-1-PA	scaffold_4700	92.31	26	2	0	5757	5680	12247	12170	0	75.7
Dicer-1-PA	scaffold_4700	89.29	28	3	0	5397	5314	6957	6874	0	71.8
Dicer-1-PA	scaffold_4700	92.86	28	2	0	4889	4806	5251	5168	0	65.3
Dicer-1-PA	scaffold_4700	86.96	23	3	0	6306	6238	16976	16908	0	59.9
Dicer-1-PA	scaffold_4700	100	22	0	0	5826	5761	13282	13217	0	56.9
Dicer-1-PA	scaffold_4700	87.88	33	4	0	6228	6130	16218	16120	0	50
Dicer-1-PA	scaffold_4700	78.95	19	4	0	6045	5989	13984	13928	0	46.5
Dicer-1-PA	scaffold_4700	78.57	14	3	0	6370	6329	17040	16999	0	37.1
Dicer-1-PA	scaffold_4700	87.65	81	10	0	4649	4891	5011	5253	0	173
Dicer-1-PA	scaffold_4700	92.73	55	4	0	5099	5263	6040	6204	0	132
Dicer-1-PA	scaffold_4700	97.83	46	1	0	5902	6039	13841	13978	0	127
Dicer-1-PA	scaffold_4700	88.46	52	6	0	6372	6527	17574	17729	0	122
Dicer-1-PA	scaffold_4700	83.33	60	10	0	5495	5674	9068	9247	0	99.5
Dicer-1-PA	scaffold_4700	88.24	34	4	0	5400	5501	8228	8329	0	82.7
Dicer-1-PA	scaffold_4700	89.66	29	3	0	5022	5108	5384	5470	0	71.8
Dicer-1-PA	scaffold_4700	81.25	32	6	0	5675	5770	12165	12260	0	70.8
Dicer-1-PA	scaffold_4700	70.83	24	7	0	4406	4477	3765	3836	0	44.6
Dicer-1-PA	scaffold_4700	81.25	16	3	0	6239	6286	16909	16956	0	42.6
Dicer-1-PA	scaffold_4700	80	15	3	0	6195	6239	16185	16229	0	36.1
Dicer-1-PA	scaffold_4700	96.23	53	2	0	5262	5104	6203	6045	0	141
Dicer-1-PA	scaffold_4700	88.46	52	6	0	6526	6371	17728	17573	0	123
Dicer-1-PA	scaffold_4700	89.58	48	5	0	4792	4649	5154	5011	0	113
Dicer-1-PA	scaffold_4700	82	50	9	0	5683	5534	9256	9107	0	109
Dicer-1-PA	scaffold_4700	87.88	33	4	0	5107	5009	5469	5371	0	82.7
Dicer-1-PA	scaffold_4700	90.32	31	3	0	5491	5399	8319	8227	0	77.2
Dicer-1-PA	scaffold_4700	87.88	33	4	0	4508	4410	3867	3769	0	77.2
Dicer-1-PA	scaffold_4700	86.67	30	4	0	5764	5675	12254	12165	0	67.8
Dicer-1-PA	scaffold_4700	80.56	36	7	0	6238	6131	16228	16121	0	48
Dicer-1-PA	scaffold_4700	93.75	16	1	0	6037	5990	13976	13929	0	46.5
Dicer-1-PA	scaffold_4700	93.75	16	1	0	4896	4849	5258	5211	0	41.1
Dicer-1-PA	scaffold_4700	80	15	3	0	6280	6236	16950	16906	0	35.6
Dicer-1-PA	scaffold_4700	100	9	0	0	4580	4554	3939	3913	0	28.7
Dicer-1-PA	scaffold_4700	80	55	11	0	5234	5398	6794	6958	1e-22	112
Dicer-1-PA	scaffold_372	97.73	176	4	0	4579	5106	29289	28762	0	484
Dicer-1-PA	scaffold_372	90.62	128	12	0	4581	4964	29287	28904	0	316
Dicer-1-PA	scaffold_372	92.03	138	11	0	1228	1641	57422	57009	0	282
Dicer-1-PA	scaffold_372	85.96	114	16	0	618	959	60679	60338	0	259
Dicer-1-PA	scaffold_372	96	100	4	0	1526	1227	57124	57423	0	253
Dicer-1-PA	scaffold_372	78.63	131	28	0	1209	1601	57441	57049	0	251
Dicer-1-PA	scaffold_372	82.03	128	23	0	1609	1226	57041	57424	0	249
Dicer-1-PA	scaffold_372	94.55	110	6	0	631	960	60666	60337	0	246
Dicer-1-PA	scaffold_372	89.87	79	8	0	1533	1297	57117	57353	0	196
Dicer-1-PA	scaffold_372	90	80	8	0	4809	4570	29059	29298	0	189
Dicer-1-PA	scaffold_372	88.89	81	9	0	1298	1540	57352	57110	0	187
Dicer-1-PA	scaffold_372	87.65	81	10	0	873	631	60424	60666	0	179
Dicer-1-PA	scaffold_372	88.89	81	9	0	4649	4891	29219	28977	0	173
Dicer-1-PA	scaffold_372	92.19	64	5	0	5485	5676	22648	22457	0	173
Dicer-1-PA	scaffold_372	89.33	75	8	0	848	624	60449	60673	0	169
Dicer-1-PA	scaffold_372	87.88	66	8	0	958	761	60339	60536	0	166
Dicer-1-PA	scaffold_372	100	58	0	0	3565	3738	37755	37582	0	166
Dicer-1-PA	scaffold_372	98.15	54	1	0	2296	2457	49625	49464	0	160
Dicer-1-PA	scaffold_372	100	55	0	0	4417	4581	29909	29745	0	159
Dicer-1-PA	scaffold_372	100	54	0	0	4742	4581	29126	29287	0	155
Dicer-1-PA	scaffold_372	98.18	55	1	0	5098	5262	28237	28073	0	149
Dicer-1-PA	scaffold_372	98.11	53	1	0	5106	4948	28762	28920	0	148
Dicer-1-PA	scaffold_372	98.15	54	1	0	4946	5107	28922	28761	0	147
Dicer-1-PA	scaffold_372	88.52	61	7	0	5675	5493	22458	22640	0	147
Dicer-1-PA	scaffold_372	100	51	0	0	958	1110	59112	58960	0	146
Dicer-1-PA	scaffold_372	100	52	0	0	6373	6528	14079	13924	0	145
Dicer-1-PA	scaffold_372	100	49	0	0	2906	2760	45662	45808	0	145
Dicer-1-PA	scaffold_372	98.08	52	1	0	5105	4950	28763	28918	0	144
Dicer-1-PA	scaffold_372	93.1	58	4	0	3738	3565	37582	37755	0	144
Dicer-1-PA	scaffold_372	94.55	55	3	0	5261	5097	28074	28238	0	144
Dicer-1-PA	scaffold_372	88.89	54	6	0	2297	2458	49624	49463	0	143
Dicer-1-PA	scaffold_372	96.3	54	2	0	166	327	62299	62138	0	142
Dicer-1-PA	scaffold_372	89.29	56	6	0	791	958	60506	60339	0	142
Dicer-1-PA	scaffold_372	96	50	2	0	2755	2904	45813	45664	0	140
Dicer-1-PA	scaffold_372	88.89	54	6	0	2298	2459	49623	49462	0	139
Dicer-1-PA	scaffold_372	98.08	52	1	0	6527	6372	13925	14080	0	139
Dicer-1-PA	scaffold_372	100	48	0	0	3736	3879	35938	35795	0	138
Dicer-1-PA	scaffold_372	82.14	56	10	0	4581	4414	29745	29912	0	138
Dicer-1-PA	scaffold_372	94.34	53	3	0	5262	5104	28073	28231	0	137
Dicer-1-PA	scaffold_372	87.27	55	7	0	2458	2294	49463	49627	0	136
Dicer-1-PA	scaffold_372	92.59	54	4	0	2456	2295	49465	49626	0	136
Dicer-1-PA	scaffold_372	88.89	54	6	0	2457	2296	49464	49625	0	135
Dicer-1-PA	scaffold_372	100	48	0	0	5764	5907	20905	20762	0	135
Dicer-1-PA	scaffold_372	95.83	48	2	0	2560	2703	47225	47082	0	135
Dicer-1-PA	scaffold_372	88	50	6	0	1711	1860	55760	55611	0	134
Dicer-1-PA	scaffold_372	87.5	56	7	0	5097	5264	28238	28071	0	134
Dicer-1-PA	scaffold_372	89.29	56	6	0	5263	5096	28072	28239	0	132
Dicer-1-PA	scaffold_372	88	50	6	0	957	1106	59113	58964	0	131
Dicer-1-PA	scaffold_372	100	45	0	0	6041	5907	19587	19721	0	130
Dicer-1-PA	scaffold_372	91.67	48	4	0	1105	962	58965	59108	0	130
Dicer-1-PA	scaffold_372	91.07	56	5	0	5096	5263	28239	28072	0	130
Dicer-1-PA	scaffold_372	81.82	55	10	0	4579	4415	29747	29911	0	130
Dicer-1-PA	scaffold_372	100	58	0	0	3737	3564	37583	37756	0	129
Dicer-1-PA	scaffold_372	84	50	8	0	3127	3276	42607	42458	0	129
Dicer-1-PA	scaffold_372	97.92	48	1	0	2696	2553	47089	47232	0	127
Dicer-1-PA	scaffold_372	97.83	46	1	0	5902	6039	19726	19589	0	127
Dicer-1-PA	scaffold_372	87.23	47	6	0	5901	6041	19727	19587	0	126
Dicer-1-PA	scaffold_372	100	45	0	0	6238	6372	14890	14756	0	126
Dicer-1-PA	scaffold_372	84.91	53	8	0	6528	6370	13924	14082	0	124
Dicer-1-PA	scaffold_372	93.62	47	3	0	2756	2896	45812	45672	0	123
Dicer-1-PA	scaffold_372	97.78	45	1	0	2763	2897	45805	45671	0	123
Dicer-1-PA	scaffold_372	74.58	59	15	0	339	163	62126	62302	0	122
Dicer-1-PA	scaffold_372	85.42	48	7	0	1725	1868	55746	55603	0	120
Dicer-1-PA	scaffold_372	100	41	0	0	1108	1230	58294	58172	0	120
Dicer-1-PA	scaffold_372	89.13	46	5	0	1861	1724	55610	55747	0	119
Dicer-1-PA	scaffold_372	91.67	48	4	0	3278	3135	42456	42599	0	118
Dicer-1-PA	scaffold_372	84.31	51	8	0	5646	5494	22487	22639	0	117
Dicer-1-PA	scaffold_372	97.56	41	1	0	3445	3567	39364	39242	0	117
Dicer-1-PA	scaffold_372	100	41	0	0	1229	1107	58173	58295	0	116
Dicer-1-PA	scaffold_372	100	40	0	0	3448	3567	39506	39387	0	116
Dicer-1-PA	scaffold_372	82.69	52	9	0	6526	6371	13926	14081	0	114
Dicer-1-PA	scaffold_372	87.5	48	6	0	322	465	61417	61274	0	114
Dicer-1-PA	scaffold_372	93.33	45	3	0	1859	1725	55612	55746	0	113
Dicer-1-PA	scaffold_372	89.58	48	5	0	4792	4649	29076	29219	0	113
Dicer-1-PA	scaffold_372	88.64	44	5	0	6237	6368	14891	14760	0	113
Dicer-1-PA	scaffold_372	95.35	43	2	0	3572	3444	39237	39365	0	112
Dicer-1-PA	scaffold_372	93.62	47	3	0	2902	2762	45666	45806	0	112
Dicer-1-PA	scaffold_372	81.48	54	10	0	6365	6526	14087	13926	0	112
Dicer-1-PA	scaffold_372	95.12	41	2	0	2908	3030	44484	44362	0	112
Dicer-1-PA	scaffold_372	100	38	0	0	3625	3738	37558	37445	0	112
Dicer-1-PA	scaffold_372	100	38	0	0	3625	3738	37421	37308	0	112
Dicer-1-PA	scaffold_372	81.63	49	9	0	5493	5639	22640	22494	0	112
Dicer-1-PA	scaffold_372	89.8	49	5	0	2907	2761	45661	45807	0	111
Dicer-1-PA	scaffold_372	85.71	42	6	0	1228	1103	58174	58299	0	111
Dicer-1-PA	scaffold_372	100	37	0	0	4111	4221	33672	33562	0	110
Dicer-1-PA	scaffold_372	100	39	0	0	1609	1725	56690	56574	0	110
Dicer-1-PA	scaffold_372	82.54	63	11	0	5486	5674	22647	22459	0	109
Dicer-1-PA	scaffold_372	84.09	44	7	0	1739	1608	56560	56691	0	109
Dicer-1-PA	scaffold_372	95	40	2	0	3023	2904	44369	44488	0	107
Dicer-1-PA	scaffold_372	100	35	0	0	2095	2199	50901	50797	0	107
Dicer-1-PA	scaffold_372	82.69	52	9	0	6372	6527	14080	13925	0	107
Dicer-1-PA	scaffold_372	100	52	0	0	10	165	63643	63488	0	107
Dicer-1-PA	scaffold_372	88.1	42	5	0	3444	3569	39365	39240	0	107
Dicer-1-PA	scaffold_372	100	37	0	0	2458	2568	47777	47667	0	106
Dicer-1-PA	scaffold_372	100	38	0	0	3738	3625	37034	37147	0	106
Dicer-1-PA	scaffold_372	89.74	39	4	0	1849	1965	55067	54951	0	106
Dicer-1-PA	scaffold_372	94.87	39	2	0	3564	3448	39390	39506	0	105
Dicer-1-PA	scaffold_372	92.68	41	3	0	3013	3135	43616	43494	0	105
Dicer-1-PA	scaffold_372	82.98	47	8	0	3738	3878	35936	35796	0	105
Dicer-1-PA	scaffold_372	82.98	47	8	0	5398	5258	27280	27420	0	104
Dicer-1-PA	scaffold_372	81.25	48	9	0	3879	3736	35795	35938	0	104
Dicer-1-PA	scaffold_372	92	50	4	0	162	13	63491	63640	0	104
Dicer-1-PA	scaffold_372	94.44	36	2	0	3349	3456	39714	39607	0	104
Dicer-1-PA	scaffold_372	94.87	39	2	0	3564	3448	39245	39361	0	104
Dicer-1-PA	scaffold_372	97.3	37	1	0	3132	3022	43497	43607	0	104
Dicer-1-PA	scaffold_372	83.33	48	8	0	3737	3880	35937	35794	0	104
Dicer-1-PA	scaffold_372	97.3	37	1	0	2567	2457	47668	47778	0	103
Dicer-1-PA	scaffold_372	74.07	54	14	0	325	164	62140	62301	0	103
Dicer-1-PA	scaffold_372	93.48	46	3	0	617	754	60680	60543	0	103
Dicer-1-PA	scaffold_372	97.37	38	1	0	6127	6240	15756	15643	0	103
Dicer-1-PA	scaffold_372	97.3	37	1	0	3023	3133	43606	43496	0	102
Dicer-1-PA	scaffold_372	83.33	42	7	0	1103	1228	58299	58174	0	102
Dicer-1-PA	scaffold_372	100	35	0	0	1964	1860	54952	55056	0	101
Dicer-1-PA	scaffold_372	92.86	42	3	0	4957	4832	28911	29036	0	100
Dicer-1-PA	scaffold_372	100	34	0	0	4319	4218	31523	31624	0	100
Dicer-1-PA	scaffold_372	76	50	12	0	5683	5534	22450	22599	0	99
Dicer-1-PA	scaffold_372	82.05	39	7	0	3024	2908	44368	44484	0	99.5
Dicer-1-PA	scaffold_372	82.05	39	7	0	4104	4220	33679	33563	0	99
Dicer-1-PA	scaffold_372	93.55	31	2	0	4414	4322	30866	30958	0	98.5
Dicer-1-PA	scaffold_372	84.21	38	6	0	1722	1609	56577	56690	0	98.5
Dicer-1-PA	scaffold_372	92.31	39	3	0	3137	3021	43492	43608	0	98
Dicer-1-PA	scaffold_372	92.11	38	3	0	278	165	62187	62300	0	97.5
Dicer-1-PA	scaffold_372	91.67	36	3	0	5504	5397	23557	23664	0	97
Dicer-1-PA	scaffold_372	100	32	0	0	5398	5493	23663	23568	0	97
Dicer-1-PA	scaffold_372	90.2	51	5	0	15	167	63638	63486	0	96.5
Dicer-1-PA	scaffold_372	82.98	47	8	0	5258	5398	27420	27280	0	96.5
Dicer-1-PA	scaffold_372	96.97	33	1	0	5107	5009	28761	28859	0	95
Dicer-1-PA	scaffold_372	94	50	3	0	1110	961	58960	59109	0	95
Dicer-1-PA	scaffold_372	97.3	37	1	0	3133	3023	43496	43606	0	94.5
Dicer-1-PA	scaffold_372	98.08	52	1	0	164	9	63489	63644	0	94.5
Dicer-1-PA	scaffold_372	96.97	33	1	0	3351	3449	39712	39614	0	94.5
Dicer-1-PA	scaffold_372	80	40	8	0	2906	3025	44486	44367	0	94
Dicer-1-PA	scaffold_372	90	40	4	0	1230	1111	58172	58291	0	93.5
Dicer-1-PA	scaffold_372	86.11	36	5	0	6131	6238	15752	15645	0	93.5
Dicer-1-PA	scaffold_372	77.78	45	10	0	194	328	62271	62137	0	92.6
Dicer-1-PA	scaffold_372	91.67	36	3	0	453	560	60847	60740	0	92.6
Dicer-1-PA	scaffold_372	100	47	0	0	5257	5397	27421	27281	0	92.6
Dicer-1-PA	scaffold_372	100	31	0	0	5674	5766	21291	21199	0	92.6
Dicer-1-PA	scaffold_372	88.89	36	4	0	3458	3351	39605	39712	0	92.1
Dicer-1-PA	scaffold_372	97.83	46	1	0	2697	2560	47088	47225	0	91.6
Dicer-1-PA	scaffold_372	80	40	8	0	1608	1727	56691	56572	0	91.6
Dicer-1-PA	scaffold_372	100	48	0	0	5906	5763	20763	20906	0	90.6
Dicer-1-PA	scaffold_372	96.88	32	1	0	3021	3116	43608	43513	0	90.6
Dicer-1-PA	scaffold_372	81.08	37	7	0	1857	1967	55059	54949	0	90.1
Dicer-1-PA	scaffold_372	83.33	36	6	0	2209	2102	50787	50894	0	89.6
Dicer-1-PA	scaffold_372	83.33	42	7	0	455	330	61284	61409	0	89.6
Dicer-1-PA	scaffold_372	100	29	0	0	6122	6036	18146	18232	0	89.1
Dicer-1-PA	scaffold_372	95.74	47	2	0	2701	2561	47084	47224	0	89.1
Dicer-1-PA	scaffold_372	85.71	35	5	0	1963	1859	54953	55057	0	89.1
Dicer-1-PA	scaffold_372	86.49	37	5	0	2566	2456	47669	47779	0	88.6
Dicer-1-PA	scaffold_372	96.77	31	1	0	6037	6129	18231	18139	0	88.6
Dicer-1-PA	scaffold_372	82.05	39	7	0	2450	2566	47785	47669	0	87.1
Dicer-1-PA	scaffold_372	75.56	45	11	0	1726	1592	56573	56707	0	86.1
Dicer-1-PA	scaffold_372	93.55	31	2	0	5768	5676	21197	21289	0	85.1
Dicer-1-PA	scaffold_372	96.3	27	1	0	5757	5677	21208	21288	0	85.1
Dicer-1-PA	scaffold_372	96.77	31	1	0	4508	4416	29818	29910	0	85.1
Dicer-1-PA	scaffold_372	97.83	46	1	0	2561	2698	47224	47087	0	85.1
Dicer-1-PA	scaffold_372	84.21	38	6	0	4218	4105	33565	33678	0	84.6
Dicer-1-PA	scaffold_372	78.57	42	9	0	324	449	61415	61290	0	84.6
Dicer-1-PA	scaffold_372	93.55	31	2	0	6036	6128	18232	18140	0	84.1
Dicer-1-PA	scaffold_372	85.29	34	5	0	1962	1861	54954	55055	0	82.7
Dicer-1-PA	scaffold_372	96.43	28	1	0	3268	3351	41070	40987	0	82.7
Dicer-1-PA	scaffold_372	93.94	33	2	0	2565	2467	47670	47768	0	81.2
Dicer-1-PA	scaffold_372	96.15	26	1	0	3869	3792	35805	35882	0	79.7
Dicer-1-PA	scaffold_372	91.18	34	3	0	4321	4220	31521	31622	0	79.2
Dicer-1-PA	scaffold_372	74.42	43	11	0	451	323	61288	61416	0	78.2
Dicer-1-PA	scaffold_372	76.74	43	10	0	450	322	61289	61417	0	77.2
Dicer-1-PA	scaffold_372	96.55	29	1	0	5022	5108	28846	28760	0	77.2
Dicer-1-PA	scaffold_372	79.41	34	7	0	2097	2198	50899	50798	0	76.7
Dicer-1-PA	scaffold_372	84.38	32	5	0	5675	5770	21290	21195	0	76.7
Dicer-1-PA	scaffold_372	86.21	29	4	0	3567	3653	37753	37667	0	76.2
Dicer-1-PA	scaffold_372	100	29	0	0	717	631	60646	60732	0	75.7
Dicer-1-PA	scaffold_372	90.32	31	3	0	3362	3270	40976	41068	0	75.2
Dicer-1-PA	scaffold_372	79.41	34	7	0	5400	5501	23661	23560	0	75.2
Dicer-1-PA	scaffold_372	100	26	0	0	3997	4074	34630	34553	0	74.7
Dicer-1-PA	scaffold_372	81.25	32	6	0	5399	5494	23662	23567	0	74.7
Dicer-1-PA	scaffold_372	81.82	33	6	0	2102	2200	50894	50796	0	74.2
Dicer-1-PA	scaffold_372	78.38	37	8	0	4416	4526	29910	29800	0	74.2
Dicer-1-PA	scaffold_372	92	25	2	0	1155	1229	58247	58173	0	73.7
Dicer-1-PA	scaffold_372	96.15	26	1	0	451	528	60849	60772	0	73.3
Dicer-1-PA	scaffold_372	93.62	47	3	0	2096	1956	51256	51396	0	72.8
Dicer-1-PA	scaffold_372	85.71	28	4	0	5397	5314	27281	27364	0	71.3
Dicer-1-PA	scaffold_372	80.65	31	6	0	3964	3872	34994	35086	0	71.3
Dicer-1-PA	scaffold_372	96.43	28	1	0	4889	4806	28979	29062	0	70.8
Dicer-1-PA	scaffold_372	100	45	0	0	6371	6237	14757	14891	0	70.3
Dicer-1-PA	scaffold_372	78.79	33	7	0	5493	5395	23568	23666	0	70.3
Dicer-1-PA	scaffold_372	85.71	28	4	0	166	83	63487	63570	0	70.3
Dicer-1-PA	scaffold_372	100	22	0	0	4219	4284	31623	31558	0	70.3
Dicer-1-PA	scaffold_372	87.1	31	4	0	5676	5768	21289	21197	0	70.3
Dicer-1-PA	scaffold_372	86.67	30	4	0	5764	5675	21201	21290	0	69.3
Dicer-1-PA	scaffold_372	95.65	23	1	0	2695	2763	46435	46367	0	69.3
Dicer-1-PA	scaffold_372	84.78	46	7	0	5259	5396	27419	27282	0	69.3
Dicer-1-PA	scaffold_372	80	35	7	0	2199	2095	50797	50901	0	68.8
Dicer-1-PA	scaffold_372	91.67	24	2	0	3156	3227	42578	42507	0	68.3
Dicer-1-PA	scaffold_372	96.97	33	1	0	3448	3350	39615	39713	0	67.8
Dicer-1-PA	scaffold_372	80.65	31	6	0	5491	5399	23570	23662	0	67.3
Dicer-1-PA	scaffold_372	95.65	23	1	0	6306	6238	14822	14890	0	66.8
Dicer-1-PA	scaffold_372	85.19	27	4	0	3270	3350	41068	40988	0	65.8
Dicer-1-PA	scaffold_372	95.65	23	1	0	2765	2697	46365	46433	0	64.8
Dicer-1-PA	scaffold_372	91.67	24	2	0	452	523	60848	60777	0	64.3
Dicer-1-PA	scaffold_372	95.65	23	1	0	2032	2100	51320	51252	0	63.4
Dicer-1-PA	scaffold_372	85.71	28	4	0	4071	3988	34556	34639	0	62.9
Dicer-1-PA	scaffold_372	91.3	23	2	0	3202	3134	42532	42600	0	62.4
Dicer-1-PA	scaffold_372	73.53	34	9	0	162	263	62303	62202	0	61.4
Dicer-1-PA	scaffold_372	91.3	23	2	0	2694	2762	46436	46368	0	61.4
Dicer-1-PA	scaffold_372	92	25	2	0	4221	4295	31621	31547	0	61.4
Dicer-1-PA	scaffold_372	88.89	27	3	0	528	448	60772	60852	0	60.4
Dicer-1-PA	scaffold_372	80	25	5	0	2457	2531	47778	47704	0	59.4
Dicer-1-PA	scaffold_372	84	25	4	0	3566	3640	37754	37680	0	59.4
Dicer-1-PA	scaffold_372	95	20	1	0	5850	5909	20819	20760	0	56.9
Dicer-1-PA	scaffold_372	100	21	0	0	5826	5764	20843	20905	0	56.4
Dicer-1-PA	scaffold_372	100	19	0	0	4358	4414	30922	30866	0	54
Dicer-1-PA	scaffold_372	85.71	21	3	0	2760	2698	46370	46432	0	53
Dicer-1-PA	scaffold_372	80.95	21	4	0	6242	6180	15641	15703	0	52.5
Dicer-1-PA	scaffold_372	90.48	21	2	0	1019	957	59051	59113	0	52.5
Dicer-1-PA	scaffold_372	84	25	4	0	520	446	60780	60854	0	52.5
Dicer-1-PA	scaffold_372	95.45	22	1	0	515	450	60785	60850	0	52
Dicer-1-PA	scaffold_372	94.44	18	1	0	2571	2624	47214	47161	0	51.5
Dicer-1-PA	scaffold_372	100	19	0	0	4413	4357	30867	30923	0	50.5
Dicer-1-PA	scaffold_372	86.96	23	3	0	2761	2693	46369	46437	0	50
Dicer-1-PA	scaffold_372	93.75	16	1	0	6239	6286	14889	14842	0	49.5
Dicer-1-PA	scaffold_372	96.3	27	1	0	1031	1111	59039	58959	0	49
Dicer-1-PA	scaffold_372	85	20	3	0	2095	2036	51257	51316	0	48.5
Dicer-1-PA	scaffold_372	85.71	21	3	0	2097	2035	51255	51317	0	48
Dicer-1-PA	scaffold_372	87.88	33	4	0	6228	6130	15655	15753	0	47.5
Dicer-1-PA	scaffold_372	93.75	16	1	0	3180	3133	42554	42601	0	47.5
Dicer-1-PA	scaffold_372	85.71	21	3	0	2699	2761	46431	46369	0	47.5
Dicer-1-PA	scaffold_372	91.18	34	3	0	4220	4321	31622	31521	0	47.5
Dicer-1-PA	scaffold_372	81.58	38	7	0	1875	1762	55596	55709	0	47
Dicer-1-PA	scaffold_372	78.95	19	4	0	6045	5989	19583	19639	0	46.5
Dicer-1-PA	scaffold_372	93.75	16	1	0	6037	5990	19591	19638	0	46.5
Dicer-1-PA	scaffold_372	95	20	1	0	1115	1056	58955	59014	0	46
Dicer-1-PA	scaffold_372	80	20	4	0	4409	4468	29917	29858	0	46
Dicer-1-PA	scaffold_372	88.89	18	2	0	4526	4579	29800	29747	0	45.1
Dicer-1-PA	scaffold_372	80	20	4	0	6238	6179	15645	15704	0	44.6
Dicer-1-PA	scaffold_372	93.33	15	1	0	6280	6236	14848	14892	0	43.6
Dicer-1-PA	scaffold_372	100	13	0	0	5762	5800	20907	20869	0	43.6
Dicer-1-PA	scaffold_372	100	16	0	0	2251	2298	50175	50128	0	42.6
Dicer-1-PA	scaffold_372	92.86	14	1	0	959	918	60338	60379	0	42.1
Dicer-1-PA	scaffold_372	93.75	16	1	0	1814	1861	55657	55610	0	42.1
Dicer-1-PA	scaffold_372	100	15	0	0	3365	3409	39698	39654	0	41.6
Dicer-1-PA	scaffold_372	70.83	24	7	0	329	400	61410	61339	0	40.6
Dicer-1-PA	scaffold_372	92.86	14	1	0	4375	4416	30905	30864	0	40.6
Dicer-1-PA	scaffold_372	78.95	19	4	0	2296	2240	50130	50186	0	40.1
Dicer-1-PA	scaffold_372	93.33	15	1	0	113	157	63540	63496	0	40.1
Dicer-1-PA	scaffold_372	88.24	34	4	0	3886	3785	35788	35889	0	39.6
Dicer-1-PA	scaffold_372	88.24	17	2	0	2300	2250	50126	50176	0	39.6
Dicer-1-PA	scaffold_372	82.35	17	3	0	2046	2096	51306	51256	0	39.6
Dicer-1-PA	scaffold_372	81.25	16	3	0	3613	3566	37707	37754	0	38.6
Dicer-1-PA	scaffold_372	81.25	16	3	0	2295	2248	50131	50178	0	37.6
Dicer-1-PA	scaffold_372	82.35	17	3	0	2241	2291	50185	50135	0	37.6
Dicer-1-PA	scaffold_372	80	15	3	0	6195	6239	15688	15644	0	37.1
Dicer-1-PA	scaffold_372	87.5	16	2	0	4896	4849	28972	29019	0	35.2
Dicer-1-PA	scaffold_372	90.91	11	1	0	957	925	60340	60372	0	35.2
Dicer-1-PA	scaffold_372	76.92	13	3	0	6370	6332	14758	14796	0	34.7
Dicer-1-PA	scaffold_372	85.71	14	2	0	2988	3029	44404	44363	0	34.7
Dicer-1-PA	scaffold_372	100	11	0	0	3405	3373	39658	39690	0	33.2
Dicer-1-PA	scaffold_372	86.67	15	2	0	3025	2981	44367	44411	0	33.2
Dicer-1-PA	scaffold_372	92.86	14	1	0	410	451	61329	61288	0	32.2
Dicer-1-PA	scaffold_372	83.33	12	2	0	6035	6070	18233	18198	0	32.2
Dicer-1-PA	scaffold_372	91.67	12	1	0	4145	4110	33638	33673	0	31.7
Dicer-1-PA	scaffold_372	84	25	4	0	3342	3268	40996	41070	0	31.7
Dicer-1-PA	scaffold_372	100	10	0	0	6069	6040	18199	18228	0	31.2
Dicer-1-PA	scaffold_372	71.43	14	4	0	4232	4191	33551	33592	0	31.2
Dicer-1-PA	scaffold_372	81.82	11	2	0	3267	3235	42467	42499	0	30.7
Dicer-1-PA	scaffold_372	84.62	13	2	0	4219	4181	33564	33602	0	30.2
Dicer-1-PA	scaffold_372	90.91	11	1	0	4383	4415	30897	30865	0	30.2
Dicer-1-PA	scaffold_372	100	38	0	0	3625	3738	37284	37171	6e-96	112
Dicer-1-PA	scaffold_372	87.8	41	5	0	3447	3569	39507	39385	6e-96	106
Dicer-1-PA	scaffold_372	70.45	44	13	0	618	749	60712	60581	6e-96	92.1
Dicer-1-PA	scaffold_372	91.18	34	3	0	2356	2457	49172	49071	6e-96	92.1
Dicer-1-PA	scaffold_372	81.82	33	6	0	1610	1708	56689	56591	6e-96	78.2
Dicer-1-PA	scaffold_372	100	38	0	0	3625	3738	37147	37034	5e-74	112
Dicer-1-PA	scaffold_372	89.74	39	4	0	3449	3565	39360	39244	5e-74	96
Dicer-1-PA	scaffold_372	72.5	40	11	0	630	749	60733	60614	5e-74	91.1
Dicer-1-PA	scaffold_372	81.25	32	6	0	2364	2459	49164	49069	5e-74	78.7
Dicer-1-PA	scaffold_372	100	38	0	0	3625	3738	37010	36897	5e-73	112
Dicer-1-PA	scaffold_372	94.44	36	2	0	3460	3567	39639	39532	5e-73	96
Dicer-1-PA	scaffold_372	88.1	42	5	0	617	742	60713	60588	5e-73	89.1
Dicer-1-PA	scaffold_372	81.25	32	6	0	2363	2458	49165	49070	5e-73	77.2
Dicer-1-PA	scaffold_372	100	38	0	0	3738	3625	37171	37284	7e-69	106
Dicer-1-PA	scaffold_372	90.7	43	4	0	3572	3444	39382	39510	7e-69	103
Dicer-1-PA	scaffold_372	90.32	31	3	0	2456	2364	49072	49164	7e-69	78.7
Dicer-1-PA	scaffold_372	77.5	40	9	0	750	631	60580	60699	7e-69	71.8
Dicer-1-PA	scaffold_372	100	38	0	0	3738	3625	37308	37421	1e-65	106
Dicer-1-PA	scaffold_372	90	40	4	0	3565	3446	39389	39508	1e-65	97
Dicer-1-PA	scaffold_372	75.76	33	8	0	2457	2359	49071	49169	1e-65	75.2
Dicer-1-PA	scaffold_372	68.29	41	13	0	750	628	60646	60768	1e-65	71.3
Dicer-1-PA	scaffold_372	100	38	0	0	3738	3625	37445	37558	5e-64	106
Dicer-1-PA	scaffold_372	90	40	4	0	3565	3446	39244	39363	5e-64	94.5
Dicer-1-PA	scaffold_372	81.25	32	6	0	2458	2363	49070	49165	5e-64	72.8
Dicer-1-PA	scaffold_372	75	40	10	0	740	621	60590	60709	5e-64	70.8
Dicer-1-PA	scaffold_372	97.37	38	1	0	3738	3625	36897	37010	4e-59	102
Dicer-1-PA	scaffold_372	94.44	36	2	0	3572	3465	39527	39634	4e-59	91.6
Dicer-1-PA	scaffold_372	78.38	37	8	0	740	630	60623	60733	4e-59	66.8
Dicer-1-PA	scaffold_372	79.31	29	6	0	2450	2364	48750	48836	4e-59	66.3
Dicer-1-PA	scaffold_372	89.74	39	4	0	3449	3565	39505	39389	1e-50	95
Dicer-1-PA	scaffold_372	89.19	37	4	0	632	742	60731	60621	1e-50	81.2
Dicer-1-PA	scaffold_372	86.21	29	4	0	2362	2448	48838	48752	1e-50	75.2
Dicer-1-PA	scaffold_372	100	14	0	0	3698	3739	37485	37444	1e-50	43.6
Dicer-1-PA	scaffold_372	100	10	0	0	3624	3653	37559	37530	1e-50	32.7
Dicer-1-PA	scaffold_372	100	32	0	0	3737	3642	37035	37130	7e-48	96.5
Dicer-1-PA	scaffold_372	87.88	33	4	0	3564	3466	39535	39633	7e-48	75.2
Dicer-1-PA	scaffold_372	83.33	30	5	0	717	628	60547	60636	7e-48	64.3
Dicer-1-PA	scaffold_372	60	30	12	0	2448	2359	48752	48841	7e-48	53.5
Dicer-1-PA	scaffold_372	100	32	0	0	3737	3642	37172	37267	4e-45	96.5
Dicer-1-PA	scaffold_372	82.86	35	6	0	3565	3461	39534	39638	4e-45	71.3
Dicer-1-PA	scaffold_372	86.21	29	4	0	707	621	60557	60643	4e-45	62.4
Dicer-1-PA	scaffold_372	67.86	28	9	0	2446	2363	48754	48837	4e-45	50
Dicer-1-PA	scaffold_372	81.08	37	7	0	3459	3569	39640	39530	1e-43	88.1
Dicer-1-PA	scaffold_372	78.12	32	7	0	621	716	60643	60548	1e-43	79.7
Dicer-1-PA	scaffold_372	67.86	28	9	0	2364	2447	48836	48753	1e-43	59.4
Dicer-1-PA	scaffold_372	100	14	0	0	3698	3739	37348	37307	1e-43	43.6
Dicer-1-PA	scaffold_372	100	10	0	0	3624	3653	37422	37393	1e-43	32.7
Dicer-1-PA	scaffold_372	65	40	14	0	630	749	60766	60647	4e-37	79.7
Dicer-1-PA	scaffold_372	84.85	33	5	0	3467	3565	39632	39534	4e-37	75.7
Dicer-1-PA	scaffold_372	67.86	28	9	0	2363	2446	48837	48754	4e-37	49
Dicer-1-PA	scaffold_372	100	14	0	0	3698	3739	37211	37170	4e-37	43.6
Dicer-1-PA	scaffold_372	100	10	0	0	3624	3653	37285	37256	4e-37	32.7
Dicer-1-PA	scaffold_372	100	32	0	0	3737	3642	37309	37404	1e-26	96.5
Dicer-1-PA	scaffold_372	63.41	41	15	0	761	639	60635	60757	1e-26	61.9
Dicer-1-PA	scaffold_372	100	32	0	0	3737	3642	37446	37541	9e-21	96.5
Dicer-1-PA	scaffold_372	62.96	27	10	0	750	670	60679	60759	9e-21	42.1
Dicer-1-PA	scaffold_372	100	30	0	0	3731	3642	36904	36993	1e-17	91.1
Dicer-1-PA	scaffold_372	77.78	18	4	0	684	631	60547	60600	1e-17	37.1
Dicer-1-PA	scaffold_372	73.68	38	10	0	628	741	60702	60589	2e-16	77.2
Dicer-1-PA	scaffold_372	100	14	0	0	3698	3739	37074	37033	2e-16	43.6
Dicer-1-PA	scaffold_372	100	10	0	0	3624	3653	37148	37119	2e-16	32.7
Dicer-1-PA	scaffold_372	75.68	37	9	0	631	741	60732	60622	9e-16	76.7
Dicer-1-PA	scaffold_372	92.86	14	1	0	3698	3739	36937	36896	9e-16	41.6
Dicer-1-PA	scaffold_372	100	10	0	0	3624	3653	37011	36982	9e-16	32.7
Dicer-1-PA	scaffold_372	90.32	31	3	0	617	709	60647	60555	5e-13	68.8
Dicer-1-PA	scaffold_372	100	14	0	0	3698	3739	37622	37581	5e-13	43.6
Dicer-1-PA	scaffold_372	54.35	46	21	0	637	774	60759	60622	6e-10	64.8
Dicer-1-PA	scaffold_372	100	13	0	0	3699	3737	37621	37583	6e-10	37.1
Dicer-1-PA	scaffold_372	85.19	27	4	0	628	708	60636	60556	4e-09	61.9
Dicer-1-PA	scaffold_372	100	13	0	0	3699	3737	37484	37446	4e-09	37.1
Dicer-1-PA	scaffold_372	72.22	36	10	0	635	742	60761	60654	2e-08	59.4
Dicer-1-PA	scaffold_372	100	13	0	0	3699	3737	37347	37309	2e-08	37.1
Dicer-1-PA	scaffold_372	68.18	22	7	0	618	683	60613	60548	3e-05	48.5
Dicer-1-PA	scaffold_372	100	13	0	0	3699	3737	37210	37172	3e-05	37.1
Dicer-1-PA	scaffold_372	51.72	29	14	0	663	749	60766	60680	0.0002	45.5
Dicer-1-PA	scaffold_372	100	13	0	0	3699	3737	37073	37035	0.0002	37.1
Dicer-1-PA	scaffold_372	85	20	3	0	617	676	60614	60555	0.008	42.1
Dicer-1-PA	scaffold_372	92.31	13	1	0	3699	3737	36936	36898	0.008	35.2
Dicer-1-PA	scaffold_382	86.61	127	17	0	1224	1604	21503	21123	0	283
Dicer-1-PA	scaffold_382	91.3	138	12	0	1228	1641	21499	21086	0	276
Dicer-1-PA	scaffold_382	86.51	126	17	0	1603	1226	21124	21501	0	266
Dicer-1-PA	scaffold_382	96	100	4	0	1526	1227	21201	21500	0	254
Dicer-1-PA	scaffold_382	88.18	110	13	0	630	959	27024	26695	0	253
Dicer-1-PA	scaffold_382	95.41	109	5	0	634	960	27020	26694	0	243
Dicer-1-PA	scaffold_382	90.38	104	10	0	1298	1609	21429	21118	0	205
Dicer-1-PA	scaffold_382	89.87	79	8	0	1533	1297	21194	21430	0	195
Dicer-1-PA	scaffold_382	87.5	80	10	0	873	634	26781	27020	0	188
Dicer-1-PA	scaffold_382	91.67	72	6	0	848	633	26806	27021	0	171
Dicer-1-PA	scaffold_382	89.39	66	7	0	958	761	26696	26893	0	167
Dicer-1-PA	scaffold_382	91.67	60	5	0	2278	2457	16030	15851	0	163
Dicer-1-PA	scaffold_382	87.5	56	7	0	2291	2458	16017	15850	0	146
Dicer-1-PA	scaffold_382	98.15	54	1	0	166	327	29592	29431	0	143
Dicer-1-PA	scaffold_382	89.29	56	6	0	2906	2739	11518	11685	0	143
Dicer-1-PA	scaffold_382	96.08	51	2	0	2752	2904	11672	11520	0	142
Dicer-1-PA	scaffold_382	94.23	52	3	0	958	1113	25402	25247	0	142
Dicer-1-PA	scaffold_382	84.75	59	9	0	2457	2281	15851	16027	0	140
Dicer-1-PA	scaffold_382	89.83	59	6	0	2456	2280	15852	16028	0	139
Dicer-1-PA	scaffold_382	87.5	56	7	0	791	958	26863	26696	0	139
Dicer-1-PA	scaffold_382	88.89	54	6	0	2298	2459	16010	15849	0	138
Dicer-1-PA	scaffold_382	100	48	0	0	3736	3879	493	350	0	138
Dicer-1-PA	scaffold_382	91.84	49	4	0	1714	1860	20269	20123	0	136
Dicer-1-PA	scaffold_382	95.83	48	2	0	2560	2703	13580	13437	0	135
Dicer-1-PA	scaffold_382	88.89	54	6	0	2458	2297	15850	16011	0	133
Dicer-1-PA	scaffold_382	81.36	59	11	0	339	163	29419	29595	0	132
Dicer-1-PA	scaffold_382	86	50	7	0	3127	3276	8135	7986	0	131
Dicer-1-PA	scaffold_382	85.19	54	8	0	325	164	29433	29594	0	126
Dicer-1-PA	scaffold_382	97.78	45	1	0	1859	1725	20124	20258	0	124
Dicer-1-PA	scaffold_382	89.58	48	5	0	2763	2906	11661	11518	0	121
Dicer-1-PA	scaffold_382	82.35	51	9	0	1725	1877	20258	20106	0	120
Dicer-1-PA	scaffold_382	100	41	0	0	1108	1230	22703	22581	0	120
Dicer-1-PA	scaffold_382	95.65	46	2	0	2696	2559	13444	13581	0	118
Dicer-1-PA	scaffold_382	89.13	46	5	0	1861	1724	20122	20259	0	118
Dicer-1-PA	scaffold_382	97.56	41	1	0	3445	3567	5056	4934	0	117
Dicer-1-PA	scaffold_382	97.56	41	1	0	3445	3567	4627	4505	0	117
Dicer-1-PA	scaffold_382	97.56	41	1	0	3445	3567	4482	4360	0	117
Dicer-1-PA	scaffold_382	89.58	48	5	0	322	465	28130	27987	0	116
Dicer-1-PA	scaffold_382	97.67	43	1	0	3572	3444	4929	5057	0	116
Dicer-1-PA	scaffold_382	89.58	48	5	0	2762	2905	11662	11519	0	116
Dicer-1-PA	scaffold_382	97.5	40	1	0	3023	2904	10048	10167	0	114
Dicer-1-PA	scaffold_382	97.56	41	1	0	1229	1107	22582	22704	0	114
Dicer-1-PA	scaffold_382	89.58	48	5	0	2905	2762	11519	11662	0	113
Dicer-1-PA	scaffold_382	100	38	0	0	3625	3738	1292	1179	0	112
Dicer-1-PA	scaffold_382	100	38	0	0	3625	3738	1155	1042	0	112
Dicer-1-PA	scaffold_382	89.8	49	5	0	2907	2761	11517	11663	0	111
Dicer-1-PA	scaffold_382	87.5	48	6	0	3278	3135	7984	8127	0	110
Dicer-1-PA	scaffold_382	100	39	0	0	2908	3024	10163	10047	0	110
Dicer-1-PA	scaffold_382	84.09	44	7	0	2068	2199	17536	17405	0	109
Dicer-1-PA	scaffold_382	94.87	39	2	0	3564	3448	4937	5053	0	108
Dicer-1-PA	scaffold_382	72	50	14	0	3597	3448	4330	4479	0	108
Dicer-1-PA	scaffold_382	97.44	39	1	0	1609	1725	20755	20639	0	107
Dicer-1-PA	scaffold_382	87.18	39	5	0	3024	2908	10047	10163	0	107
Dicer-1-PA	scaffold_382	91.23	57	5	0	10	180	30990	30820	0	106
Dicer-1-PA	scaffold_382	100	37	0	0	2458	2568	14301	14191	0	106
Dicer-1-PA	scaffold_382	100	38	0	0	3738	3625	1042	1155	0	106
Dicer-1-PA	scaffold_382	100	38	0	0	3738	3625	1179	1292	0	106
Dicer-1-PA	scaffold_382	89.74	39	4	0	1849	1965	19484	19368	0	106
Dicer-1-PA	scaffold_382	92.68	41	3	0	3013	3135	9280	9158	0	105
Dicer-1-PA	scaffold_382	94.44	36	2	0	3349	3456	5261	5154	0	104
Dicer-1-PA	scaffold_382	82.93	41	7	0	2903	3025	10168	10046	0	103
Dicer-1-PA	scaffold_382	75.56	45	11	0	1742	1608	20622	20756	0	103
Dicer-1-PA	scaffold_382	86.67	45	6	0	194	328	29564	29430	0	103
Dicer-1-PA	scaffold_382	74.51	51	13	0	957	1109	25403	25251	0	102
Dicer-1-PA	scaffold_382	94.59	37	2	0	2567	2457	14192	14302	0	101
Dicer-1-PA	scaffold_382	91.89	37	3	0	3132	3022	9161	9271	0	100
Dicer-1-PA	scaffold_382	94.74	38	2	0	278	165	29480	29593	0	100
Dicer-1-PA	scaffold_382	82.5	40	7	0	1608	1727	20756	20637	0	100
Dicer-1-PA	scaffold_382	75.51	49	12	0	1108	962	25252	25398	0	98.5
Dicer-1-PA	scaffold_382	88.1	42	5	0	455	330	27997	28122	0	97.5
Dicer-1-PA	scaffold_382	83.64	55	9	0	15	179	30985	30821	0	97.5
Dicer-1-PA	scaffold_382	75	48	12	0	3879	3736	350	493	0	97
Dicer-1-PA	scaffold_382	91.84	49	4	0	162	16	30838	30984	0	97
Dicer-1-PA	scaffold_382	100	32	0	0	3737	3642	1043	1138	0	96.5
Dicer-1-PA	scaffold_382	94.74	38	2	0	3134	3021	9159	9272	0	96.5
Dicer-1-PA	scaffold_382	94.29	35	2	0	1964	1860	19369	19473	0	96.5
Dicer-1-PA	scaffold_382	76.6	47	11	0	3738	3878	491	351	0	96
Dicer-1-PA	scaffold_382	88.57	35	4	0	1963	1859	19370	19474	0	94
Dicer-1-PA	scaffold_382	83.78	37	6	0	1857	1967	19476	19366	0	93.5
Dicer-1-PA	scaffold_382	91.89	37	3	0	3023	3133	9270	9160	0	92.1
Dicer-1-PA	scaffold_382	86.49	37	5	0	2566	2456	14193	14303	0	91.6
Dicer-1-PA	scaffold_382	84.21	38	6	0	1722	1609	20642	20755	0	91.6
Dicer-1-PA	scaffold_382	93.94	33	2	0	3351	3449	5259	5161	0	91.1
Dicer-1-PA	scaffold_382	96.15	52	2	0	164	9	30836	30991	0	90.6
Dicer-1-PA	scaffold_382	77.5	40	9	0	1103	1222	22708	22589	0	90.1
Dicer-1-PA	scaffold_382	86.11	36	5	0	3458	3351	5152	5259	0	89.6
Dicer-1-PA	scaffold_382	94.12	34	2	0	1962	1861	19371	19472	0	89.6
Dicer-1-PA	scaffold_382	93.48	46	3	0	2697	2560	13443	13580	0	88.6
Dicer-1-PA	scaffold_382	90	40	4	0	635	754	27019	26900	0	88.6
Dicer-1-PA	scaffold_382	88.89	36	4	0	453	560	27210	27103	0	88.1
Dicer-1-PA	scaffold_382	80.49	41	8	0	2450	2572	14309	14187	0	87.1
Dicer-1-PA	scaffold_382	86.84	38	5	0	2565	2452	14194	14307	0	86.6
Dicer-1-PA	scaffold_382	81.58	38	7	0	2209	2096	17395	17508	0	86.1
Dicer-1-PA	scaffold_382	84.21	38	6	0	1224	1111	22587	22700	0	86.1
Dicer-1-PA	scaffold_382	78.57	42	9	0	324	449	28128	28003	0	85.1
Dicer-1-PA	scaffold_382	74	50	13	0	3731	3880	498	349	0	85.1
Dicer-1-PA	scaffold_382	93.48	46	3	0	2695	2558	13445	13582	0	84.1
Dicer-1-PA	scaffold_382	79.07	43	9	0	450	322	28002	28130	0	84.1
Dicer-1-PA	scaffold_382	89.19	37	4	0	3133	3023	9160	9270	0	82.7
Dicer-1-PA	scaffold_382	93.48	46	3	0	2561	2698	13579	13442	0	82.7
Dicer-1-PA	scaffold_382	96.43	28	1	0	3268	3351	6592	6509	0	82.7
Dicer-1-PA	scaffold_382	97.87	47	1	0	2096	1956	18337	18477	0	82.2
Dicer-1-PA	scaffold_382	79.41	34	7	0	2097	2198	17507	17406	0	81.7
Dicer-1-PA	scaffold_382	75.56	45	11	0	1726	1592	20638	20772	0	80.2
Dicer-1-PA	scaffold_382	74.42	43	11	0	451	323	28001	28129	0	80.2
Dicer-1-PA	scaffold_382	96.15	26	1	0	3869	3792	360	437	0	79.7
Dicer-1-PA	scaffold_382	93.55	31	2	0	3362	3270	6498	6590	0	77.2
Dicer-1-PA	scaffold_382	82.35	34	6	0	162	263	29596	29495	0	77.2
Dicer-1-PA	scaffold_382	90.62	32	3	0	3021	3116	9272	9177	0	76.2
Dicer-1-PA	scaffold_382	80	35	7	0	2096	2200	17508	17404	0	74.2
Dicer-1-PA	scaffold_382	96.15	26	1	0	451	528	27212	27135	0	73.3
Dicer-1-PA	scaffold_382	95.83	24	1	0	3156	3227	8106	8035	0	72.8
Dicer-1-PA	scaffold_382	85.71	28	4	0	166	83	30834	30917	0	71.8
Dicer-1-PA	scaffold_382	95.65	23	1	0	2695	2763	12683	12615	0	69.3
Dicer-1-PA	scaffold_382	85.19	27	4	0	3270	3350	6590	6510	0	66.8
Dicer-1-PA	scaffold_382	89.66	29	3	0	716	630	27010	27096	0	65.3
Dicer-1-PA	scaffold_382	95.65	23	1	0	2765	2697	12613	12681	0	64.8
Dicer-1-PA	scaffold_382	88	25	3	0	2457	2531	14302	14228	0	64.3
Dicer-1-PA	scaffold_382	80	35	7	0	2199	2095	17405	17509	0	63.4
Dicer-1-PA	scaffold_382	95.65	23	1	0	2032	2100	18401	18333	0	63.4
Dicer-1-PA	scaffold_382	90.48	21	2	0	1174	1112	22637	22699	0	61.9
Dicer-1-PA	scaffold_382	90.91	33	3	0	3448	3350	5162	5260	0	61.4
Dicer-1-PA	scaffold_382	85.19	27	4	0	1041	961	25319	25399	0	61.4
Dicer-1-PA	scaffold_382	91.3	23	2	0	2694	2762	12684	12616	0	61.4
Dicer-1-PA	scaffold_382	87.5	24	3	0	452	523	27211	27140	0	58.9
Dicer-1-PA	scaffold_382	90.48	21	2	0	2760	2698	12618	12680	0	58.4
Dicer-1-PA	scaffold_382	85.19	27	4	0	528	448	27135	27215	0	56.9
Dicer-1-PA	scaffold_382	82.61	23	4	0	3202	3134	8060	8128	0	53.5
Dicer-1-PA	scaffold_382	91.3	23	2	0	2761	2693	12617	12685	0	53.5
Dicer-1-PA	scaffold_382	90	20	2	0	2241	2300	16793	16734	0	53
Dicer-1-PA	scaffold_382	90.48	21	2	0	1019	957	25341	25403	0	52.5
Dicer-1-PA	scaffold_382	95.45	22	1	0	515	450	27148	27213	0	52
Dicer-1-PA	scaffold_382	90.48	21	2	0	2699	2761	12679	12617	0	51
Dicer-1-PA	scaffold_382	94.74	19	1	0	2295	2239	16739	16795	0	49.5
Dicer-1-PA	scaffold_382	94.74	19	1	0	2296	2240	16738	16794	0	48.5
Dicer-1-PA	scaffold_382	80	25	5	0	520	446	27143	27217	0	48
Dicer-1-PA	scaffold_382	76	25	6	0	323	397	28129	28055	0	48
Dicer-1-PA	scaffold_382	80	20	4	0	2095	2036	18338	18397	0	47
Dicer-1-PA	scaffold_382	88.89	18	2	0	2571	2624	13569	13516	0	47
Dicer-1-PA	scaffold_382	80.95	21	4	0	2097	2035	18336	18398	0	45.1
Dicer-1-PA	scaffold_382	74.36	39	10	0	1878	1762	20105	20221	0	45.1
Dicer-1-PA	scaffold_382	100	14	0	0	959	918	26695	26736	0	44.1
Dicer-1-PA	scaffold_382	94.74	19	1	0	2240	2296	16794	16738	0	43.6
Dicer-1-PA	scaffold_382	100	14	0	0	3698	3739	1219	1178	0	43.6
Dicer-1-PA	scaffold_382	100	16	0	0	2251	2298	16783	16736	0	42.6
Dicer-1-PA	scaffold_382	94.12	17	1	0	2300	2250	16734	16784	0	41.6
Dicer-1-PA	scaffold_382	100	15	0	0	1817	1861	20166	20122	0	41.6
Dicer-1-PA	scaffold_382	93.75	16	1	0	1109	1062	25251	25298	0	41.1
Dicer-1-PA	scaffold_382	100	13	0	0	2988	3026	10083	10045	0	38.6
Dicer-1-PA	scaffold_382	93.33	15	1	0	3025	2981	10046	10090	0	38.1
Dicer-1-PA	scaffold_382	76.47	17	4	0	2046	2096	18387	18337	0	38.1
Dicer-1-PA	scaffold_382	81.25	16	3	0	110	157	30890	30843	0	37.6
Dicer-1-PA	scaffold_382	86.67	15	2	0	3365	3409	5245	5201	0	36.1
Dicer-1-PA	scaffold_382	90.91	11	1	0	957	925	26697	26729	0	35.2
Dicer-1-PA	scaffold_382	100	12	0	0	1188	1223	22623	22588	0	34.7
Dicer-1-PA	scaffold_382	81.25	16	3	0	3180	3133	8082	8129	0	34.2
Dicer-1-PA	scaffold_382	92.31	13	1	0	1073	1111	25287	25249	0	34.2
Dicer-1-PA	scaffold_382	71.43	14	4	0	1269	1228	21458	21499	0	33.7
Dicer-1-PA	scaffold_382	100	12	0	0	1222	1187	22589	22624	0	33.7
Dicer-1-PA	scaffold_382	85.71	14	2	0	1113	1072	25247	25288	0	33.2
Dicer-1-PA	scaffold_382	100	10	0	0	3624	3653	1293	1264	0	32.7
Dicer-1-PA	scaffold_382	92.86	14	1	0	410	451	28042	28001	0	32.2
Dicer-1-PA	scaffold_382	84	25	4	0	3342	3268	6518	6592	0	31.7
Dicer-1-PA	scaffold_382	90.48	42	4	0	3444	3569	4628	4503	4e-74	115
Dicer-1-PA	scaffold_382	82.86	35	6	0	2353	2457	15607	15503	4e-74	88.1
Dicer-1-PA	scaffold_382	78.79	33	7	0	618	716	27003	26905	4e-74	82.7
Dicer-1-PA	scaffold_382	78.79	33	7	0	1610	1708	20754	20656	4e-74	72.8
Dicer-1-PA	scaffold_382	100	14	0	0	3698	3739	1082	1041	4e-74	43.6
Dicer-1-PA	scaffold_382	100	10	0	0	3624	3653	1156	1127	4e-74	32.7
Dicer-1-PA	scaffold_382	97.44	39	1	0	3564	3448	4508	4624	1e-66	108
Dicer-1-PA	scaffold_382	100	32	0	0	3737	3642	1180	1275	1e-66	96.5
Dicer-1-PA	scaffold_382	90.32	31	3	0	2456	2364	15140	15232	1e-66	81.2
Dicer-1-PA	scaffold_382	89.29	28	3	0	711	628	27015	27098	1e-66	65.3
Dicer-1-PA	scaffold_382	43.33	30	17	0	2126	2037	17478	17567	1e-66	30.7
Dicer-1-PA	scaffold_382	92.86	42	3	0	3444	3569	5057	4932	2e-55	112
Dicer-1-PA	scaffold_382	88.24	34	4	0	2356	2457	15240	15139	2e-55	87.6
Dicer-1-PA	scaffold_382	68.29	41	13	0	630	752	27096	26974	2e-55	78.2
Dicer-1-PA	scaffold_382	100	13	0	0	3699	3737	1218	1180	2e-55	37.1
Dicer-1-PA	scaffold_382	94.87	39	2	0	3449	3565	5052	4936	4e-47	102
Dicer-1-PA	scaffold_382	81.25	32	6	0	2364	2459	15232	15137	4e-47	74.7
Dicer-1-PA	scaffold_382	58.54	41	17	0	630	752	27129	27007	4e-47	72.3
Dicer-1-PA	scaffold_382	100	13	0	0	3699	3737	1081	1043	4e-47	37.1
Dicer-1-PA	scaffold_382	93.02	43	3	0	3572	3444	4500	4628	8e-45	105
Dicer-1-PA	scaffold_382	72.73	33	9	0	2457	2359	15139	15237	8e-45	74.2
Dicer-1-PA	scaffold_382	64.1	39	14	0	744	628	27015	27131	8e-45	63.9
Dicer-1-PA	scaffold_382	100	13	0	0	3736	3698	1044	1082	8e-45	35.6
Dicer-1-PA	scaffold_382	92.31	39	3	0	3449	3565	4623	4507	5e-43	99
Dicer-1-PA	scaffold_382	78.12	32	7	0	2363	2458	15233	15138	5e-43	74.2
Dicer-1-PA	scaffold_382	89.29	28	3	0	631	714	27095	27012	5e-43	70.8
Dicer-1-PA	scaffold_382	95	40	2	0	3565	3446	4936	5055	2e-42	100
Dicer-1-PA	scaffold_382	81.25	32	6	0	2458	2363	15138	15233	2e-42	72.8
Dicer-1-PA	scaffold_382	82.76	29	5	0	707	621	26914	27000	2e-42	61.9
Dicer-1-PA	scaffold_382	100	13	0	0	3736	3698	1181	1219	2e-42	35.6
Dicer-1-PA	scaffold_382	94.44	36	2	0	3460	3567	5186	5079	9e-40	96
Dicer-1-PA	scaffold_382	75	32	8	0	2363	2458	15597	15502	9e-40	67.8
Dicer-1-PA	scaffold_382	80	25	5	0	668	742	27019	26945	9e-40	51
Dicer-1-PA	scaffold_382	86.36	22	3	0	617	682	27076	27011	9e-40	47
Dicer-1-PA	scaffold_382	92.5	40	3	0	3565	3446	4507	4626	2e-39	99.5
Dicer-1-PA	scaffold_382	80	35	7	0	2456	2352	15504	15608	2e-39	72.3
Dicer-1-PA	scaffold_382	71.43	28	8	0	750	667	26937	27020	2e-39	46
Dicer-1-PA	scaffold_382	88.89	18	2	0	678	625	27015	27068	2e-39	43.1
Dicer-1-PA	scaffold_382	90.7	43	4	0	3572	3444	4355	4483	9e-37	97
Dicer-1-PA	scaffold_382	64.86	37	13	0	2469	2359	15491	15601	9e-37	66.3
Dicer-1-PA	scaffold_382	82.14	28	5	0	711	628	26910	26993	9e-37	59.4
Dicer-1-PA	scaffold_382	78.38	37	8	0	3459	3569	5187	5077	4e-35	87.1
Dicer-1-PA	scaffold_382	57.5	40	17	0	630	749	27057	26938	4e-35	67.3
Dicer-1-PA	scaffold_382	71.88	32	9	0	2364	2459	15596	15501	4e-35	62.9
Dicer-1-PA	scaffold_382	82.5	40	7	0	3565	3446	4362	4481	6e-33	87.6
Dicer-1-PA	scaffold_382	71.88	32	9	0	2458	2363	15502	15597	6e-33	63.4
Dicer-1-PA	scaffold_382	63.41	41	15	0	761	639	26998	27120	6e-33	58.9
Dicer-1-PA	scaffold_382	82.05	39	7	0	3449	3565	4478	4362	2e-24	85.1
Dicer-1-PA	scaffold_382	92.86	28	2	0	632	715	27094	27011	2e-24	65.8
Dicer-1-PA	scaffold_382	88.46	26	3	0	3444	3521	4483	4406	2e-21	71.8
Dicer-1-PA	scaffold_382	51.11	45	22	0	618	752	27075	26941	2e-21	65.3
Dicer-1-PA	scaffold_382	91.67	12	1	0	3534	3569	4393	4358	2e-21	33.2
Dicer-1-PA	scaffold_382	100	22	0	0	3444	3509	4912	4847	3e-21	66.8
Dicer-1-PA	scaffold_382	54.35	46	21	0	637	774	27122	26985	3e-21	65.3
Dicer-1-PA	scaffold_382	81.25	16	3	0	3525	3572	4822	4775	3e-21	37.6
Dicer-1-PA	scaffold_382	91.67	36	3	0	3572	3465	5074	5181	7e-21	84.1
Dicer-1-PA	scaffold_382	66.67	36	12	0	740	633	26947	27054	7e-21	54.9
Dicer-1-PA	scaffold_382	95.45	22	1	0	3445	3510	4911	4846	6e-20	65.8
Dicer-1-PA	scaffold_382	83.87	31	5	0	617	709	27004	26912	6e-20	63.4
Dicer-1-PA	scaffold_382	65	20	7	0	3510	3569	4707	4648	6e-20	36.1
Dicer-1-PA	scaffold_382	81.82	33	6	0	3467	3565	5179	5081	1e-18	71.3
Dicer-1-PA	scaffold_382	72.22	36	10	0	635	742	27124	27017	1e-18	59.9
Dicer-1-PA	scaffold_382	100	20	0	0	3448	3507	4754	4695	2e-17	61.9
Dicer-1-PA	scaffold_382	66.67	36	12	0	634	741	27053	26946	2e-17	59.9
Dicer-1-PA	scaffold_382	100	11	0	0	3533	3565	4684	4652	2e-17	35.2
Dicer-1-PA	scaffold_382	84.85	33	5	0	3564	3466	5082	5180	4e-16	74.7
Dicer-1-PA	scaffold_382	65.62	32	11	0	716	621	26977	27072	4e-16	48
Dicer-1-PA	scaffold_382	86.96	23	3	0	3447	3515	4755	4687	5e-16	59.4
Dicer-1-PA	scaffold_382	81.48	27	5	0	628	708	26993	26913	5e-16	57.4
Dicer-1-PA	scaffold_382	100	12	0	0	3532	3567	4685	4650	5e-16	35.2
Dicer-1-PA	scaffold_382	100	21	0	0	3449	3511	4907	4845	3e-13	55.9
Dicer-1-PA	scaffold_382	100	11	0	0	3533	3565	4814	4782	3e-13	35.2
Dicer-1-PA	scaffold_382	63.64	11	4	0	3424	3456	5041	5009	3e-13	25.8
Dicer-1-PA	scaffold_382	80	35	7	0	3565	3461	5081	5185	9e-13	70.3
Dicer-1-PA	scaffold_382	100	9	0	0	3402	3376	5208	5234	9e-13	27.7
Dicer-1-PA	scaffold_382	100	21	0	0	3510	3448	4846	4908	3e-12	60.4
Dicer-1-PA	scaffold_382	100	11	0	0	3564	3532	4783	4815	3e-12	36.1
Dicer-1-PA	scaffold_382	100	22	0	0	3509	3444	4847	4912	2e-11	59.9
Dicer-1-PA	scaffold_382	81.25	16	3	0	3569	3522	4778	4825	2e-11	33.7
Dicer-1-PA	scaffold_382	90.91	22	2	0	3509	3444	4693	4758	4e-11	56.4
Dicer-1-PA	scaffold_382	82.35	17	3	0	3572	3522	4645	4695	4e-11	36.1
Dicer-1-PA	scaffold_382	81.48	27	5	0	3526	3446	4676	4756	5e-11	55.9
Dicer-1-PA	scaffold_382	100	11	0	0	3564	3532	4653	4685	5e-11	36.1
Dicer-1-PA	scaffold_382	100	21	0	0	3508	3446	4848	4910	2e-09	58.4
Dicer-1-PA	scaffold_382	100	11	0	0	3565	3533	4782	4814	2e-09	28.2
Dicer-1-PA	scaffold_382	90.48	21	2	0	3449	3511	4753	4691	2e-09	51.5
Dicer-1-PA	scaffold_382	68.18	22	7	0	618	683	26970	26905	2e-09	48.5
Dicer-1-PA	scaffold_382	95	20	1	0	3507	3448	4695	4754	6e-08	53.5
Dicer-1-PA	scaffold_382	100	11	0	0	3565	3533	4652	4684	6e-08	28.2
Dicer-1-PA	scaffold_382	48.28	29	15	0	663	749	27129	27043	0.0008	45.5
Dicer-1-PA	scaffold_382	100	12	0	0	3532	3567	4815	4780	0.0008	35.2
Dicer-1-PA	scaffold_382	48.48	33	17	0	618	716	27042	26944	0.02	45.1
Dicer-1-PA	scaffold_382	62.07	29	11	0	628	714	27065	26979	0.04	44.1
Dicer-1-PA	scaffold_382	40	40	24	0	630	749	27090	26971	0.057	43.6
Dicer-1-PA	scaffold_11654	60.56	71	28	0	5827	6039	4062	3850	7e-38	116
Dicer-1-PA	scaffold_11654	38.89	54	33	0	6184	6345	2060	1899	7e-38	52.5
Dicer-1-PA	scaffold_11654	56.25	32	14	0	5497	5592	6667	6572	7e-38	49
Dicer-1-PA	scaffold_11654	53.85	52	24	0	6008	5853	3881	4036	7e-09	57.9
Dicer-1-PA	scaffold_11654	50	28	14	0	5582	5499	6582	6665	7e-09	36.1
Dicer-1-PA	scaffold_42090	77.42	31	7	0	3964	3872	1253	1345	4e-21	69.8
Dicer-1-PA	scaffold_42090	89.29	28	3	0	4071	3988	797	880	4e-21	63.4
Dicer-1-PA	scaffold_42090	100	26	0	0	3997	4074	871	794	3e-13	74.7
Dicer-1-PA	scaffold_42090	81.82	11	2	0	3963	3995	905	873	3e-13	25.3
Dicer-1-PA	scaffold_16516	52.63	57	27	0	5098	5268	3919	3749	1e-12	79.2
Dicer-1-PA	scaffold_43029	53.33	30	14	0	2275	2364	448	537	1e-06	48.5
Dicer-1-PA	scaffold_43029	55	20	9	0	2485	2544	999	1058	1e-06	35.6
Dicer-1-PA	scaffold_22835	60.61	33	13	0	1879	1977	2815	2913	1e-06	59.4
Dicer-1-PA	scaffold_16600	53.49	43	20	0	624	752	5616	5488	0.0001	52.5
Dicer-1-PA	scaffold_16600	54.29	35	16	0	639	743	5636	5532	0.005	47
Dicer-1-PA	scaffold_16600	54.29	35	16	0	639	743	5634	5530	0.007	46.5
Dicer-1-PA	scaffold_16600	63.16	19	7	0	624	680	5618	5562	0.033	33.2
Dicer-1-PA	scaffold_16600	38.89	36	22	0	663	770	5573	5466	0.033	28.7
Dicer-1-PA	scaffold_16600	43.9	41	23	0	630	752	5608	5486	0.04	44.1
Dicer-1-PA	scaffold_1798	50	30	15	0	663	752	21320	21409	0.0008	39.6
Dicer-1-PA	scaffold_1798	66.67	15	5	0	633	677	21152	21196	0.0008	27.7
Dicer-1-PA	scaffold_1798	55.17	29	13	0	630	716	21320	21406	0.057	43.6
Dicer-1-PA	scaffold_20253	76.92	13	3	0	3295	3333	2373	2411	0.002	33.7
Dicer-1-PA	scaffold_20253	34.38	32	21	0	3355	3450	3015	3110	0.002	33.7
Dicer-1-PA	scaffold_20253	26.67	30	22	0	3649	3738	3663	3752	0.002	30.7
Dicer-1-PA	scaffold_60	68.75	16	5	0	696	743	134787	134740	0.002	33.2
Dicer-1-PA	scaffold_60	52.17	23	11	0	624	692	134874	134806	0.002	32.7
Dicer-1-PA	scaffold_60	63.16	19	7	0	624	680	134872	134816	0.094	30.7
Dicer-1-PA	scaffold_60	62.5	16	6	0	663	710	134787	134740	0.094	29.2
Dicer-1-PA	scaffold_23580	41.46	41	24	0	1834	1956	2058	1936	0.01	46
Dicer-1-PA	scaffold_11	44.44	36	20	0	5146	5253	147856	147963	0.01	46
Dicer-1-PA	scaffold_7573	60.87	23	9	0	5928	5996	8121	8053	0.029	44.6
Dicer-1-PA	scaffold_14774	39.02	41	25	0	630	752	4765	4643	0.08	43.1
Dicer-1-PA	scaffold_10285	46.15	26	14	0	2927	3004	8530	8607	0.085	33.7
Dicer-1-PA	scaffold_10285	75	12	3	0	3014	3049	8595	8630	0.085	26.7
Dicer-2-PA	scaffold_20253	95	100	5	0	2164	2463	1125	1424	0	259
Dicer-2-PA	scaffold_20253	98.65	74	1	0	2839	3060	3531	3752	0	205
Dicer-2-PA	scaffold_20253	98.33	60	1	0	2443	2622	1708	1887	0	171
Dicer-2-PA	scaffold_20253	98.04	51	1	0	2701	2853	3012	3164	0	139
Dicer-2-PA	scaffold_20253	97.78	45	1	0	2035	2169	524	658	0	133
Dicer-2-PA	scaffold_20253	90	30	3	0	2620	2709	2343	2432	0	86.6
Dicer-2-PA	scaffold_20253	98.92	93	1	0	2444	2166	1405	1127	0	252
Dicer-2-PA	scaffold_20253	94.87	78	4	0	3060	2827	3752	3519	0	210
Dicer-2-PA	scaffold_20253	96.67	60	2	0	2625	2446	1890	1711	0	176
Dicer-2-PA	scaffold_20253	92.16	51	4	0	2851	2699	3162	3010	0	137
Dicer-2-PA	scaffold_20253	93.33	45	3	0	2169	2035	658	524	0	124
Dicer-2-PA	scaffold_20253	100	28	0	0	2703	2620	2426	2343	0	81.2
Dicer-2-PA	scaffold_20253	98.91	92	1	0	2442	2167	1403	1128	0	222
Dicer-2-PA	scaffold_20253	100	73	0	0	3059	2841	3751	3533	0	197
Dicer-2-PA	scaffold_20253	98.33	60	1	0	2623	2444	1888	1709	0	158
Dicer-2-PA	scaffold_20253	94.12	51	3	0	2852	2700	3163	3011	0	127
Dicer-2-PA	scaffold_20253	93.18	44	3	0	2167	2036	656	525	0	110
Dicer-2-PA	scaffold_20253	96.67	30	1	0	2704	2615	2427	2338	0	80.7
Dicer-2-PA	scaffold_20253	96.77	93	3	0	2169	2447	1130	1408	0	258
Dicer-2-PA	scaffold_20253	100	72	0	0	2844	3059	3536	3751	0	203
Dicer-2-PA	scaffold_20253	96.72	61	2	0	2442	2624	1707	1889	0	164
Dicer-2-PA	scaffold_20253	93.18	44	3	0	2036	2167	525	656	0	109
Dicer-2-PA	scaffold_20253	93.75	32	2	0	2612	2707	2335	2430	0	81.2
Dicer-2-PA	scaffold_20253	100	17	0	0	2700	2750	3011	3061	0	51.5
Dicer-2-PA	scaffold_20253	85	20	3	0	2793	2852	3104	3163	0	41.6
Dicer-2-PA	scaffold_20253	98.65	74	1	0	2840	3061	3532	3753	4e-175	194
Dicer-2-PA	scaffold_20253	98.55	69	1	0	2168	2374	1129	1335	4e-175	188
Dicer-2-PA	scaffold_20253	96.67	60	2	0	2444	2623	1709	1888	4e-175	148
Dicer-2-PA	scaffold_20253	91.11	45	4	0	2034	2168	523	657	4e-175	105
Dicer-2-PA	scaffold_20253	100	28	0	0	2622	2705	2345	2428	4e-175	77.7
Dicer-2-PA	scaffold_20253	81.25	16	3	0	2804	2851	3115	3162	4e-175	32.7
Dicer-2-PA	scaffold_20253	98.25	57	1	0	2338	2168	1299	1129	1e-153	165
Dicer-2-PA	scaffold_20253	98.33	60	1	0	2624	2445	1889	1710	1e-153	153
Dicer-2-PA	scaffold_20253	100	41	0	0	2965	2843	3657	3535	1e-153	117
Dicer-2-PA	scaffold_20253	100	27	0	0	2702	2622	2425	2345	1e-153	70.8
Dicer-2-PA	scaffold_20253	95.83	24	1	0	2443	2372	1404	1333	1e-153	53.5
Dicer-2-PA	scaffold_20253	94.12	17	1	0	2087	2037	576	526	1e-153	47.5
Dicer-2-PA	scaffold_20253	84.21	19	3	0	2850	2794	3161	3105	1e-153	41.1
Dicer-2-PA	scaffold_20253	100	14	0	0	3058	3017	3750	3709	1e-153	40.1
Dicer-2-PA	scaffold_20253	92.31	13	1	0	2733	2695	3044	3006	1e-153	39.1
Dicer-2-PA	scaffold_20253	100	11	0	0	2168	2136	657	625	1e-153	34.2
Dicer-2-PA	scaffold_11654	95.89	73	3	0	4347	4565	4063	3845	0	200
Dicer-2-PA	scaffold_11654	98.41	63	1	0	4711	4899	2060	1872	0	175
Dicer-2-PA	scaffold_11654	100	53	0	0	4189	4347	5522	5364	0	148
Dicer-2-PA	scaffold_11654	94.34	53	3	0	4557	4715	3535	3377	0	146
Dicer-2-PA	scaffold_11654	94.34	53	3	0	4899	5057	918	760	0	138
Dicer-2-PA	scaffold_11654	97.22	36	1	0	4084	4191	6667	6560	0	99
Dicer-2-PA	scaffold_11654	41.67	24	14	0	1257	1328	7206	7135	0	30.2
Dicer-2-PA	scaffold_11654	98.63	73	1	0	4559	4341	3851	4069	0	190
Dicer-2-PA	scaffold_11654	95.16	62	3	0	4898	4713	1873	2058	0	168
Dicer-2-PA	scaffold_11654	86.89	61	8	0	5056	4874	761	943	0	158
Dicer-2-PA	scaffold_11654	85	60	9	0	4354	4175	5357	5536	0	140
Dicer-2-PA	scaffold_11654	94.34	53	3	0	4714	4556	3378	3536	0	137
Dicer-2-PA	scaffold_11654	97.22	36	1	0	4193	4086	6558	6665	0	99
Dicer-2-PA	scaffold_11654	100	71	0	0	4348	4560	4062	3850	0	194
Dicer-2-PA	scaffold_11654	89.06	64	7	0	4713	4904	2058	1867	0	163
Dicer-2-PA	scaffold_11654	91.07	56	5	0	4175	4342	5536	5369	0	135
Dicer-2-PA	scaffold_11654	98.11	53	1	0	4900	5058	917	759	0	134
Dicer-2-PA	scaffold_11654	96.3	54	2	0	4555	4716	3537	3376	0	105
Dicer-2-PA	scaffold_11654	100	28	0	0	4110	4193	6641	6558	0	86.6
Dicer-2-PA	scaffold_11654	95.77	71	3	0	4558	4346	3852	4064	0	188
Dicer-2-PA	scaffold_11654	89.06	64	7	0	4899	4708	1872	2063	0	152
Dicer-2-PA	scaffold_11654	85.48	62	9	0	5058	4873	759	944	0	139
Dicer-2-PA	scaffold_11654	91.07	56	5	0	4341	4174	5370	5537	0	133
Dicer-2-PA	scaffold_11654	97.22	36	1	0	4191	4084	6560	6667	0	99
Dicer-2-PA	scaffold_11654	92.59	54	4	0	4716	4555	3376	3537	0	95.5
Dicer-2-PA	scaffold_11654	95.77	71	3	0	4557	4345	3853	4065	2e-165	179
Dicer-2-PA	scaffold_11654	89.06	64	7	0	4903	4712	1868	2059	2e-165	150
Dicer-2-PA	scaffold_11654	100	52	0	0	4346	4191	5365	5520	2e-165	131
Dicer-2-PA	scaffold_11654	84.09	44	7	0	4216	4085	6535	6666	2e-165	99
Dicer-2-PA	scaffold_11654	96.77	31	1	0	4991	4899	826	918	2e-165	86.6
Dicer-2-PA	scaffold_11654	92.59	27	2	0	4637	4557	3455	3535	2e-165	72.8
Dicer-2-PA	scaffold_11654	94.44	72	4	0	4343	4558	4067	3852	3e-133	177
Dicer-2-PA	scaffold_11654	89.06	64	7	0	4712	4903	2059	1868	3e-133	157
Dicer-2-PA	scaffold_11654	87.93	58	7	0	4176	4349	5535	5362	3e-133	135
Dicer-2-PA	scaffold_11654	100	31	0	0	4622	4714	3470	3378	3e-133	87.6
Dicer-2-PA	scaffold_11654	90.91	11	1	0	4556	4588	3536	3504	3e-133	29.7
Dicer-2-PA	scaffold_11654	83.61	61	10	0	4874	5056	943	761	3e-48	131
Dicer-2-PA	scaffold_11654	83.33	48	8	0	4085	4228	6666	6523	3e-48	94.5
Dicer-2-PA	scaffold_22835	98.77	81	1	0	1161	1403	1955	2197	0	225
Dicer-2-PA	scaffold_22835	91.67	60	5	0	846	1025	997	1176	0	147
Dicer-2-PA	scaffold_22835	95.65	46	2	0	1024	1161	1704	1841	0	121
Dicer-2-PA	scaffold_22835	100	40	0	0	1405	1524	2809	2928	0	115
Dicer-2-PA	scaffold_22835	97.44	39	1	0	1522	1638	3240	3356	0	107
Dicer-2-PA	scaffold_22835	85.19	27	4	0	781	861	3	83	0	75.2
Dicer-2-PA	scaffold_22835	98.77	81	1	0	1403	1161	2197	1955	0	219
Dicer-2-PA	scaffold_22835	96.67	60	2	0	1025	846	1176	997	0	147
Dicer-2-PA	scaffold_22835	97.78	45	1	0	1160	1026	1840	1706	0	121
Dicer-2-PA	scaffold_22835	92.86	42	3	0	1526	1401	2930	2805	0	111
Dicer-2-PA	scaffold_22835	93.02	43	3	0	1650	1522	3368	3240	0	106
Dicer-2-PA	scaffold_22835	88.46	26	3	0	858	781	80	3	0	65.8
Dicer-2-PA	scaffold_22835	98.75	80	1	0	1162	1401	1956	2195	1e-169	215
Dicer-2-PA	scaffold_22835	93.48	46	3	0	1025	1162	1705	1842	1e-169	120
Dicer-2-PA	scaffold_22835	92.86	56	4	0	857	1024	1008	1175	1e-169	120
Dicer-2-PA	scaffold_22835	92.68	41	3	0	1401	1523	2805	2927	1e-169	105
Dicer-2-PA	scaffold_22835	97.37	38	1	0	1521	1634	3239	3352	1e-169	99.5
Dicer-2-PA	scaffold_22835	100	22	0	0	780	845	2	67	1e-169	61.9
Dicer-2-PA	scaffold_22835	71.43	14	4	0	1613	1654	3331	3372	1e-169	27.7
Dicer-2-PA	scaffold_22835	96.34	82	3	0	1407	1162	2201	1956	2e-153	198
Dicer-2-PA	scaffold_22835	91.3	46	4	0	1162	1025	1842	1705	2e-153	114
Dicer-2-PA	scaffold_22835	86.36	44	6	0	1651	1520	3369	3238	2e-153	97.5
Dicer-2-PA	scaffold_22835	84.09	44	7	0	1530	1399	2934	2803	2e-153	97.5
Dicer-2-PA	scaffold_22835	93.94	33	2	0	942	844	1093	995	2e-153	90.6
Dicer-2-PA	scaffold_22835	88.46	26	3	0	857	780	79	2	2e-153	64.8
Dicer-2-PA	scaffold_22835	90.91	11	1	0	1023	991	1174	1142	2e-153	32.7
Dicer-2-PA	scaffold_22835	97.53	81	2	0	1160	1402	1954	2196	1e-128	194
Dicer-2-PA	scaffold_22835	98.36	61	1	0	844	1026	995	1177	1e-128	115
Dicer-2-PA	scaffold_22835	89.13	46	5	0	1023	1160	1703	1840	1e-128	114
Dicer-2-PA	scaffold_22835	92.68	41	3	0	1400	1522	2804	2926	1e-128	95.5
Dicer-2-PA	scaffold_22835	100	13	0	0	779	817	1	39	1e-128	37.1
Dicer-2-PA	scaffold_22835	100	13	0	0	1523	1561	3241	3279	1e-128	33.7
Dicer-2-PA	scaffold_22835	97.4	77	2	0	1387	1157	2181	1951	1e-99	196
Dicer-2-PA	scaffold_22835	90.48	42	4	0	1024	899	1175	1050	1e-99	97.5
Dicer-2-PA	scaffold_22835	95.83	24	1	0	1522	1451	2926	2855	1e-99	61.4
Dicer-2-PA	scaffold_22835	95.24	21	1	0	1089	1027	1769	1707	1e-99	59.4
Dicer-2-PA	scaffold_22835	100	14	0	0	1562	1521	3280	3239	1e-99	38.1
Dicer-2-PA	scaffold_22835	100	10	0	0	1634	1605	3352	3323	1e-99	31.7
Dicer-2-PA	scaffold_22835	100	13	0	0	817	779	39	1	1e-99	29.7
Dicer-2-PA	scaffold_16516	98.73	79	1	0	3526	3762	3982	3746	2e-144	211
Dicer-2-PA	scaffold_16516	89.09	55	6	0	3352	3516	4593	4429	2e-144	136
Dicer-2-PA	scaffold_16516	94	50	3	0	3760	3909	3449	3300	2e-144	136
Dicer-2-PA	scaffold_16516	100	38	0	0	3238	3351	5047	4934	2e-144	113
Dicer-2-PA	scaffold_16516	88.89	9	1	0	3501	3527	4447	4421	2e-144	25.3
Dicer-2-PA	scaffold_16516	93.75	80	5	0	3764	3525	3744	3983	9e-134	201
Dicer-2-PA	scaffold_16516	100	46	0	0	3896	3759	3313	3450	9e-134	127
Dicer-2-PA	scaffold_16516	88	50	6	0	3498	3349	4447	4596	9e-134	120
Dicer-2-PA	scaffold_16516	97.5	40	1	0	3356	3237	4929	5048	9e-134	104
Dicer-2-PA	scaffold_16516	81.82	11	2	0	3528	3496	4420	4452	9e-134	33.7
Dicer-2-PA	scaffold_16516	87.8	82	10	0	3516	3761	3992	3747	1e-123	184
Dicer-2-PA	scaffold_16516	90	50	5	0	3759	3908	3450	3301	1e-123	125
Dicer-2-PA	scaffold_16516	87.76	49	6	0	3353	3499	4592	4446	1e-123	117
Dicer-2-PA	scaffold_16516	97.37	38	1	0	3239	3352	5046	4933	1e-123	97
Dicer-2-PA	scaffold_16516	100	9	0	0	3497	3523	4451	4425	1e-123	28.7
Dicer-2-PA	scaffold_16516	89.74	78	8	0	3759	3526	3749	3982	9e-120	175
Dicer-2-PA	scaffold_16516	91.67	48	4	0	3903	3760	3306	3449	9e-120	118
Dicer-2-PA	scaffold_16516	87.5	48	6	0	3496	3353	4449	4592	9e-120	114
Dicer-2-PA	scaffold_16516	97.44	39	1	0	3351	3235	4934	5050	9e-120	104
Dicer-2-PA	scaffold_16516	100	9	0	0	3527	3501	4421	4447	9e-120	27.2
Dicer-2-PA	scaffold_16516	87.5	80	10	0	3521	3760	3987	3748	4e-101	163
Dicer-2-PA	scaffold_16516	87.5	48	6	0	3354	3497	4591	4448	4e-101	115
Dicer-2-PA	scaffold_16516	94.87	39	2	0	3240	3356	5045	4929	4e-101	96.5
Dicer-2-PA	scaffold_16516	87.88	33	4	0	3755	3853	3454	3356	4e-101	76.2
Dicer-2-PA	scaffold_16516	88.89	9	1	0	3499	3525	4449	4423	4e-101	26.2
Dicer-2-PA	scaffold_16516	83.05	59	10	0	3497	3321	4448	4624	9e-71	122
Dicer-2-PA	scaffold_16516	87.23	47	6	0	3760	3620	3748	3888	9e-71	108
Dicer-2-PA	scaffold_16516	93.55	31	2	0	3853	3761	3356	3448	9e-71	71.8
Dicer-2-PA	scaffold_16516	94.74	19	1	0	3580	3524	3928	3984	9e-71	49
Dicer-2-PA	scaffold_16516	88.64	44	5	0	3352	3221	4933	5064	4e-20	103
Dicer-2-PA	scaffold_29735	100	61	0	0	349	531	720	902	2e-95	179
Dicer-2-PA	scaffold_29735	93.02	43	3	0	528	656	1507	1635	2e-95	116
Dicer-2-PA	scaffold_29735	100	38	0	0	241	354	314	427	2e-95	111
Dicer-2-PA	scaffold_29735	98.36	61	1	0	530	348	901	719	1e-88	163
Dicer-2-PA	scaffold_29735	85.11	47	7	0	657	517	1636	1496	1e-88	111
Dicer-2-PA	scaffold_29735	92.31	39	3	0	355	239	428	312	1e-88	109
Dicer-2-PA	scaffold_29735	95.24	42	2	0	653	528	1632	1507	1e-75	109
Dicer-2-PA	scaffold_29735	90.24	41	4	0	360	238	433	311	1e-75	104
Dicer-2-PA	scaffold_29735	87.1	31	4	0	424	332	795	703	1e-75	79.2
Dicer-2-PA	scaffold_29735	92.59	27	2	0	531	451	902	822	1e-75	71.3
Dicer-2-PA	scaffold_29735	97.62	42	1	0	529	654	1508	1633	7e-67	107
Dicer-2-PA	scaffold_29735	93.94	33	2	0	336	434	707	805	7e-67	87.6
Dicer-2-PA	scaffold_29735	94.74	38	2	0	239	352	312	425	7e-67	87.1
Dicer-2-PA	scaffold_29735	91.67	24	2	0	461	532	832	903	7e-67	52.5
Dicer-2-PA	scaffold_29735	95.12	41	2	0	530	652	1509	1631	5e-46	98.5
Dicer-2-PA	scaffold_29735	92	25	2	0	341	415	712	786	5e-46	55.9
Dicer-2-PA	scaffold_29735	100	14	0	0	240	281	313	354	5e-46	51.5
Dicer-2-PA	scaffold_29735	100	16	0	0	483	530	854	901	5e-46	50
Dicer-2-PA	scaffold_29735	83.33	12	2	0	318	353	391	426	5e-46	29.7
Dicer-2-PA	scaffold_29735	100	24	0	0	652	581	1631	1560	3e-26	71.8
Dicer-2-PA	scaffold_29735	100	17	0	0	399	349	770	720	3e-26	48.5
Dicer-2-PA	scaffold_29735	100	15	0	0	526	482	897	853	3e-26	42.6
Dicer-2-PA	scaffold_29735	100	11	0	0	272	240	345	313	3e-26	33.2
Dicer-2-PA	scaffold_372	61.36	44	17	0	4297	4428	20893	20762	5e-75	73.3
Dicer-2-PA	scaffold_372	50.94	53	26	0	3589	3747	28237	28079	5e-75	70.3
Dicer-2-PA	scaffold_372	54.35	46	21	0	4423	4560	19726	19589	5e-75	68.3
Dicer-2-PA	scaffold_372	50	42	21	0	4054	4179	22666	22541	5e-75	57.4
Dicer-2-PA	scaffold_372	50	34	17	0	1390	1491	55058	54957	5e-75	51.5
Dicer-2-PA	scaffold_372	61.54	26	10	0	4690	4767	15720	15643	5e-75	45.1
Dicer-2-PA	scaffold_372	52.17	23	11	0	1780	1848	49625	49557	5e-75	37.1
Dicer-2-PA	scaffold_372	41.94	31	18	0	1918	2010	47783	47691	5e-75	36.6
Dicer-2-PA	scaffold_372	37.5	32	20	0	2704	2799	39708	39613	5e-75	36.1
Dicer-2-PA	scaffold_372	76.92	13	3	0	2650	2688	41043	41005	5e-75	33.7
Dicer-2-PA	scaffold_372	50	22	11	0	2818	2883	39597	39532	5e-75	33.2
Dicer-2-PA	scaffold_372	26.67	30	22	0	2971	3060	37671	37582	5e-75	30.7
Dicer-2-PA	scaffold_372	36.36	33	21	0	3751	3849	27418	27320	5e-75	29.7
Dicer-2-PA	scaffold_372	58.82	17	7	0	1486	1536	51398	51348	5e-75	29.2
Dicer-2-PA	scaffold_372	36.11	36	23	0	4765	4872	14890	14783	5e-75	29.2
Dicer-2-PA	scaffold_372	62.5	24	9	0	4151	4080	22569	22640	0.003	39.1
Dicer-2-PA	scaffold_372	50	32	16	0	4529	4434	19620	19715	0.003	34.2
Dicer-2-PA	scaffold_372	48.57	35	18	0	4424	4320	20766	20870	0.003	32.2
Dicer-2-PA	scaffold_43029	100	61	0	0	1741	1923	430	612	8e-66	172
Dicer-2-PA	scaffold_43029	97.44	39	1	0	1922	2038	970	1086	8e-66	109
Dicer-2-PA	scaffold_43029	92.54	67	5	0	1728	1928	417	617	3e-64	168
Dicer-2-PA	scaffold_43029	93.02	43	3	0	1918	2046	966	1094	3e-64	108
Dicer-2-PA	scaffold_43029	98.36	61	1	0	1923	1741	612	430	9e-61	167
Dicer-2-PA	scaffold_43029	97.44	39	1	0	2037	1921	1085	969	9e-61	98
Dicer-2-PA	scaffold_43029	98.36	61	1	0	1922	1740	611	429	1e-50	156
Dicer-2-PA	scaffold_43029	97.56	41	1	0	2045	1923	1093	971	1e-50	74.7
Dicer-2-PA	scaffold_43029	86.27	51	7	0	1721	1873	410	562	6e-48	117
Dicer-2-PA	scaffold_43029	97.44	39	1	0	1923	2039	971	1087	6e-48	104
Dicer-2-PA	scaffold_43029	100	37	0	0	1879	1769	568	458	1e-25	89.6
Dicer-2-PA	scaffold_43029	95.65	23	1	0	1990	1922	1038	970	1e-25	57.9
Dicer-2-PA	scaffold_11153	91.67	48	4	0	109	252	7119	7262	1e-50	124
Dicer-2-PA	scaffold_11153	100	38	0	0	1	114	6588	6701	1e-50	109
Dicer-2-PA	scaffold_11153	95.35	43	2	0	239	111	7249	7121	8e-48	121
Dicer-2-PA	scaffold_11153	92.31	39	3	0	117	1	6704	6588	8e-48	102
Dicer-2-PA	scaffold_11153	93.18	44	3	0	110	241	7120	7251	3e-44	110
Dicer-2-PA	scaffold_11153	94.74	38	2	0	3	116	6590	6703	3e-44	102
Dicer-2-PA	scaffold_11153	90.91	44	4	0	243	112	7253	7122	6e-43	115
Dicer-2-PA	scaffold_11153	94.74	38	2	0	115	2	6702	6589	6e-43	92.6
Dicer-2-PA	scaffold_11153	86.67	45	6	0	111	245	7121	7255	9e-42	103
Dicer-2-PA	scaffold_11153	94.74	38	2	0	2	115	6589	6702	9e-42	100
Dicer-2-PA	scaffold_11153	88.37	43	5	0	238	110	7248	7120	2e-18	97
Dicer-2-PA	scaffold_11153	90.91	11	1	0	116	84	6703	6671	2e-18	28.7
Dicer-2-PA	scaffold_4700	52.83	53	25	0	4297	4455	13232	13390	4e-43	75.2
Dicer-2-PA	scaffold_4700	52.83	53	25	0	3589	3747	6039	6197	4e-43	73.7
Dicer-2-PA	scaffold_4700	58.97	39	16	0	4063	4179	9049	9165	4e-43	59.4
Dicer-2-PA	scaffold_4700	61.54	26	10	0	4690	4767	16153	16230	4e-43	45.1
Dicer-2-PA	scaffold_4700	36.36	33	21	0	3751	3849	6820	6918	4e-43	29.7
Dicer-2-PA	scaffold_4700	36.11	36	23	0	4765	4872	16908	17015	4e-43	29.2
Dicer-2-PA	scaffold_4700	54.35	46	21	0	4423	4560	13841	13978	2e-09	68.3
Dicer-2-PA	scaffold_4700	60	30	12	0	4151	4062	9137	9048	1e-05	45.1
Dicer-2-PA	scaffold_4700	43.18	44	25	0	4451	4320	13386	13255	1e-05	36.6
Dicer-2-PA	scaffold_4700	55.56	18	8	0	4529	4476	13947	13894	1e-05	27.2
Dicer-2-PA	scaffold_47823	100	32	0	0	3145	3240	809	904	9e-36	92.1
Dicer-2-PA	scaffold_47823	93.33	30	2	0	3056	3145	260	349	9e-36	89.1
Dicer-2-PA	scaffold_47823	100	33	0	0	3240	3142	904	806	2e-35	92.1
Dicer-2-PA	scaffold_47823	93.33	30	2	0	3145	3056	349	260	2e-35	88.1
Dicer-2-PA	scaffold_47823	91.18	34	3	0	3244	3143	908	807	3e-32	86.1
Dicer-2-PA	scaffold_47823	96.67	30	1	0	3146	3057	350	261	3e-32	83.2
Dicer-2-PA	scaffold_47823	93.33	30	2	0	3144	3055	348	259	9e-31	83.2
Dicer-2-PA	scaffold_47823	100	32	0	0	3239	3144	903	808	9e-31	81.2
Dicer-2-PA	scaffold_47823	93.55	31	2	0	3055	3147	259	351	8e-21	82.2
Dicer-2-PA	scaffold_47823	100	15	0	0	3144	3188	808	852	8e-21	43.6
Dicer-2-PA	scaffold_47823	90	10	1	0	3212	3241	876	905	8e-21	27.2
Dicer-2-PA	scaffold_47823	96.43	28	1	0	3057	3140	261	344	1e-12	74.7
Dicer-2-PA	scaffold_47823	100	11	0	0	3143	3175	807	839	1e-12	28.7
Dicer-2-PA	scaffold_382	50	34	17	0	1390	1491	19475	19374	8e-19	51.5
Dicer-2-PA	scaffold_382	48.28	29	15	0	1762	1848	16030	15944	8e-19	42.1
Dicer-2-PA	scaffold_382	41.94	31	18	0	1918	2010	14307	14215	8e-19	36.6
Dicer-2-PA	scaffold_382	37.5	32	20	0	2704	2799	5255	5160	8e-19	36.1
Dicer-2-PA	scaffold_382	76.92	13	3	0	2650	2688	6565	6527	8e-19	33.7
Dicer-2-PA	scaffold_382	50	22	11	0	2818	2883	5144	5079	8e-19	33.2
Dicer-2-PA	scaffold_382	27.27	33	24	0	2971	3069	1131	1033	8e-19	33.2
Dicer-2-PA	scaffold_4137	38.64	44	27	0	1384	1515	20888	20757	0.011	45.5
Dicer-2-PA	scaffold_728	38.64	44	27	0	1384	1515	42720	42589	0.011	45.5
Dicer-2-PA	scaffold_11	41.03	39	23	0	3637	3753	147856	147972	0.016	45.1
Dicer-2-PA	scaffold_11	38.46	39	24	0	4396	4512	147856	147972	0.016	45.1
Dicer-2-PA	scaffold_9913	45.95	37	20	0	1417	1527	1080	970	0.031	44.1
Dicer-2-PA	scaffold_2921	43.9	41	23	0	4396	4518	29584	29462	0.031	44.1
Dicer-2-PA	scaffold_160	43.9	41	23	0	4396	4518	175998	176120	0.031	44.1
Pasha-PA	scaffold_7331	96.67	120	4	0	523	882	7747	8106	0	329
Pasha-PA	scaffold_7331	100	94	0	0	1801	2082	10279	10560	0	258
Pasha-PA	scaffold_7331	92.39	92	7	0	522	797	7746	8021	0	235
Pasha-PA	scaffold_7331	98.86	88	1	0	264	1	6432	6169	0	234
Pasha-PA	scaffold_7331	98.86	88	1	0	2	265	6170	6433	0	233
Pasha-PA	scaffold_7331	98.59	71	1	0	880	1092	8107	8319	0	200
Pasha-PA	scaffold_7331	97.22	72	2	0	1	216	6169	6384	0	193
Pasha-PA	scaffold_7331	86.17	94	13	0	1799	2080	10277	10558	0	187
Pasha-PA	scaffold_7331	96.92	65	2	0	196	2	6364	6170	0	182
Pasha-PA	scaffold_7331	94.44	72	4	0	876	1091	8103	8318	0	173
Pasha-PA	scaffold_7331	95.83	72	3	0	1090	875	8317	8102	0	168
Pasha-PA	scaffold_7331	85.94	64	9	0	1534	1343	9228	9037	0	159
Pasha-PA	scaffold_7331	93.33	60	4	0	879	700	8103	7924	0	153
Pasha-PA	scaffold_7331	85.07	67	10	0	1542	1342	9236	9036	0	150
Pasha-PA	scaffold_7331	90.2	51	5	0	529	377	7652	7500	0	144
Pasha-PA	scaffold_7331	85.96	57	8	0	1343	1513	9037	9207	0	143
Pasha-PA	scaffold_7331	100	48	0	0	379	522	7502	7645	0	141
Pasha-PA	scaffold_7331	85.48	62	9	0	1344	1529	9038	9223	0	141
Pasha-PA	scaffold_7331	91.84	49	4	0	377	523	7500	7646	0	140
Pasha-PA	scaffold_7331	89.09	55	6	0	1104	940	8331	8167	0	140
Pasha-PA	scaffold_7331	97.87	47	1	0	1543	1683	9637	9777	0	139
Pasha-PA	scaffold_7331	100	48	0	0	521	378	7644	7501	0	132
Pasha-PA	scaffold_7331	100	44	0	0	1676	1545	9770	9639	0	126
Pasha-PA	scaffold_7331	97.67	43	1	0	1090	1218	8426	8554	0	123
Pasha-PA	scaffold_7331	97.73	44	1	0	1217	1086	8553	8422	0	121
Pasha-PA	scaffold_7331	100	42	0	0	1216	1341	8662	8787	0	121
Pasha-PA	scaffold_7331	97.56	41	1	0	1557	1679	9651	9773	0	118
Pasha-PA	scaffold_7331	81.48	54	10	0	2080	1919	10558	10397	0	116
Pasha-PA	scaffold_7331	93.02	43	3	0	646	518	7870	7742	0	116
Pasha-PA	scaffold_7331	98	50	1	0	1949	1800	10427	10278	0	110
Pasha-PA	scaffold_7331	86.05	43	6	0	1089	1217	8425	8553	0	108
Pasha-PA	scaffold_7331	97.56	41	1	0	1678	1800	10040	10162	0	107
Pasha-PA	scaffold_7331	90.48	42	4	0	1340	1215	8786	8661	0	105
Pasha-PA	scaffold_7331	83.72	43	7	0	1219	1091	8555	8427	0	101
Pasha-PA	scaffold_7331	89.47	38	4	0	1680	1793	10042	10155	0	100
Pasha-PA	scaffold_7331	83.33	48	8	0	384	241	7150	7007	0	98
Pasha-PA	scaffold_7331	95.24	42	2	0	648	523	7872	7747	0	95
Pasha-PA	scaffold_7331	73.17	41	11	0	1218	1340	8664	8786	0	89.6
Pasha-PA	scaffold_7331	96.97	33	1	0	779	877	8003	8101	0	89.1
Pasha-PA	scaffold_7331	89.29	28	3	0	766	683	7990	7907	0	75.2
Pasha-PA	scaffold_7331	92.86	28	2	0	2081	1998	10559	10476	0	72.8
Pasha-PA	scaffold_7331	96.15	26	1	0	1799	1722	10161	10084	0	72.3
Pasha-PA	scaffold_7331	92.31	26	2	0	303	380	7069	7146	0	68.3
Pasha-PA	scaffold_7331	100	23	0	0	689	621	7913	7845	0	66.3
Pasha-PA	scaffold_7331	85.71	28	4	0	1752	1669	10114	10031	0	64.8
Pasha-PA	scaffold_7331	86.21	29	4	0	388	302	7154	7068	0	64.8
Pasha-PA	scaffold_7331	95.83	24	1	0	313	384	7079	7150	0	63.1
Pasha-PA	scaffold_7331	95	20	1	0	1678	1619	9772	9713	0	57.9
Pasha-PA	scaffold_7331	95	20	1	0	938	879	8165	8106	0	54.9
Pasha-PA	scaffold_7331	85.71	21	3	0	1863	1801	10341	10279	0	50
Pasha-PA	scaffold_7331	100	15	0	0	263	307	7029	7073	0	49
Pasha-PA	scaffold_7331	92.86	14	1	0	1789	1748	10151	10110	0	41.6
Pasha-PA	scaffold_7331	68.18	22	7	0	1341	1276	8787	8722	0	41.6
Pasha-PA	scaffold_7331	92.31	13	1	0	880	842	8104	8066	0	34.7
Pasha-PA	scaffold_7331	90.91	11	1	0	1711	1679	10073	10041	0	28.2
Pasha-PA	scaffold_7331	96.77	62	2	0	3	188	6171	6356	0	159
Pasha-PA	scaffold_7331	88.46	52	6	0	378	533	7501	7656	0	139
Pasha-PA	scaffold_7331	86.05	43	6	0	1091	1219	8427	8555	0	95.5
Pasha-PA	scaffold_7331	100	49	0	0	1342	1488	9036	9182	0	95.1
Pasha-PA	scaffold_7331	96.67	30	1	0	1821	1910	10299	10388	0	82.2
Pasha-PA	scaffold_7331	70.45	44	13	0	1211	1342	8657	8788	0	75.2
Pasha-PA	scaffold_7331	75.61	41	10	0	1959	2081	10437	10559	0	73.3
Pasha-PA	scaffold_7331	85.19	27	4	0	1724	1804	10086	10166	0	70.3
Pasha-PA	scaffold_7331	95.45	22	1	0	1619	1684	9713	9778	0	58.9
Pasha-PA	scaffold_7331	95.24	21	1	0	992	1054	8219	8281	0	56.4
Pasha-PA	scaffold_7331	100	20	0	0	881	940	8108	8167	0	49.5
Pasha-PA	scaffold_7331	100	16	0	0	617	664	7841	7888	0	46
Pasha-PA	scaffold_7331	93.75	16	1	0	524	571	7748	7795	0	43.1
Pasha-PA	scaffold_7331	93.33	15	1	0	837	881	8061	8105	0	39.1
Pasha-PA	scaffold_7331	85.71	14	2	0	701	742	7925	7966	0	30.2
Pasha-PA	scaffold_7331	93.75	48	3	0	522	379	7645	7502	3e-141	131
Pasha-PA	scaffold_7331	97.14	35	1	0	1091	987	8318	8214	3e-141	93.5
Pasha-PA	scaffold_7331	85.71	42	6	0	1218	1093	8554	8429	3e-141	89.1
Pasha-PA	scaffold_7331	81.97	61	11	0	2082	1900	10560	10378	3e-141	87.1
Pasha-PA	scaffold_7331	91.3	46	4	0	1478	1341	9172	9035	3e-141	86.1
Pasha-PA	scaffold_7331	100	21	0	0	377	315	7143	7081	3e-141	60.4
Pasha-PA	scaffold_7331	90.48	21	2	0	1683	1621	9777	9715	3e-141	53
Pasha-PA	scaffold_7331	93.75	16	1	0	1867	1820	10345	10298	3e-141	42.1
Pasha-PA	scaffold_7331	100	15	0	0	566	522	7790	7746	3e-141	39.1
Pasha-PA	scaffold_7331	62.5	24	9	0	1342	1271	8788	8717	3e-141	34.2
Pasha-PA	scaffold_7331	100	9	0	0	29	3	6197	6171	3e-141	27.7
Pasha-PA	scaffold_1019	40	40	24	0	1688	1807	15156	15037	0.098	41.1
Pasha-PB	scaffold_7331	93.85	130	8	0	1	390	7717	8106	0	339
Pasha-PB	scaffold_7331	100	94	0	0	1309	1590	10279	10560	0	259
Pasha-PB	scaffold_7331	91.75	97	8	0	15	305	7731	8021	0	244
Pasha-PB	scaffold_7331	98.59	71	1	0	388	600	8107	8319	0	200
Pasha-PB	scaffold_7331	86.17	94	13	0	1307	1588	10277	10558	0	187
Pasha-PB	scaffold_7331	94.44	72	4	0	384	599	8103	8318	0	173
Pasha-PB	scaffold_7331	85.94	64	9	0	1042	851	9228	9037	0	159
Pasha-PB	scaffold_7331	93.33	60	4	0	387	208	8103	7924	0	153
Pasha-PB	scaffold_7331	85.96	57	8	0	851	1021	9037	9207	0	143
Pasha-PB	scaffold_7331	85.48	62	9	0	852	1037	9038	9223	0	141
Pasha-PB	scaffold_7331	89.09	55	6	0	612	448	8331	8167	0	140
Pasha-PB	scaffold_7331	97.87	47	1	0	1051	1191	9637	9777	0	139
Pasha-PB	scaffold_7331	93.62	47	3	0	154	14	7870	7730	0	128
Pasha-PB	scaffold_7331	100	44	0	0	1184	1053	9770	9639	0	126
Pasha-PB	scaffold_7331	97.67	43	1	0	598	726	8426	8554	0	123
Pasha-PB	scaffold_7331	97.73	44	1	0	725	594	8553	8422	0	121
Pasha-PB	scaffold_7331	100	42	0	0	724	849	8662	8787	0	121
Pasha-PB	scaffold_7331	97.56	41	1	0	1065	1187	9651	9773	0	118
Pasha-PB	scaffold_7331	98	50	1	0	1457	1308	10427	10278	0	110
Pasha-PB	scaffold_7331	86.05	43	6	0	597	725	8425	8553	0	108
Pasha-PB	scaffold_7331	97.56	41	1	0	1186	1308	10040	10162	0	108
Pasha-PB	scaffold_7331	90.48	42	4	0	848	723	8786	8661	0	105
Pasha-PB	scaffold_7331	89.47	38	4	0	1188	1301	10042	10155	0	100
Pasha-PB	scaffold_7331	73.17	41	11	0	726	848	8664	8786	0	89.6
Pasha-PB	scaffold_7331	96.97	33	1	0	287	385	8003	8101	0	89.1
Pasha-PB	scaffold_7331	92.86	28	2	0	1589	1506	10559	10476	0	72.8
Pasha-PB	scaffold_7331	100	23	0	0	197	129	7913	7845	0	66.3
Pasha-PB	scaffold_7331	85.71	28	4	0	1260	1177	10114	10031	0	64.8
Pasha-PB	scaffold_7331	95	20	1	0	446	387	8165	8106	0	54.9
Pasha-PB	scaffold_7331	92.86	14	1	0	1297	1256	10151	10110	0	41.6
Pasha-PB	scaffold_7331	95.83	72	3	0	598	383	8317	8102	0	168
Pasha-PB	scaffold_7331	85.07	67	10	0	1050	850	9236	9036	0	150
Pasha-PB	scaffold_7331	81.48	54	10	0	1588	1427	10558	10397	0	116
Pasha-PB	scaffold_7331	92.31	52	4	0	156	1	7872	7717	0	114
Pasha-PB	scaffold_7331	83.72	43	7	0	727	599	8555	8427	0	101
Pasha-PB	scaffold_7331	89.29	28	3	0	274	191	7990	7907	0	75.2
Pasha-PB	scaffold_7331	96.15	26	1	0	1307	1230	10161	10084	0	72.3
Pasha-PB	scaffold_7331	95	20	1	0	1186	1127	9772	9713	0	57.9
Pasha-PB	scaffold_7331	85.71	21	3	0	1371	1309	10341	10279	0	50
Pasha-PB	scaffold_7331	68.18	22	7	0	849	784	8787	8722	0	41.6
Pasha-PB	scaffold_7331	92.31	13	1	0	388	350	8104	8066	0	34.7
Pasha-PB	scaffold_7331	90.91	11	1	0	1219	1187	10073	10041	0	28.2
Pasha-PB	scaffold_7331	86.05	43	6	0	599	727	8427	8555	3e-158	95.5
Pasha-PB	scaffold_7331	100	49	0	0	850	996	9036	9182	3e-158	95.3
Pasha-PB	scaffold_7331	96.67	30	1	0	1329	1418	10299	10388	3e-158	82.2
Pasha-PB	scaffold_7331	70.45	44	13	0	719	850	8657	8788	3e-158	75.2
Pasha-PB	scaffold_7331	75.61	41	10	0	1467	1589	10437	10559	3e-158	73.3
Pasha-PB	scaffold_7331	85.19	27	4	0	1232	1312	10086	10166	3e-158	70.3
Pasha-PB	scaffold_7331	92.31	26	2	0	2	79	7718	7795	3e-158	64.8
Pasha-PB	scaffold_7331	95.45	22	1	0	1127	1192	9713	9778	3e-158	58.9
Pasha-PB	scaffold_7331	95.24	21	1	0	500	562	8219	8281	3e-158	56.4
Pasha-PB	scaffold_7331	100	20	0	0	389	448	8108	8167	3e-158	49.5
Pasha-PB	scaffold_7331	100	16	0	0	125	172	7841	7888	3e-158	46
Pasha-PB	scaffold_7331	93.33	15	1	0	345	389	8061	8105	3e-158	39.1
Pasha-PB	scaffold_7331	85.71	14	2	0	209	250	7925	7966	3e-158	30.2
Pasha-PB	scaffold_7331	97.14	35	1	0	599	495	8318	8214	7e-101	93.5
Pasha-PB	scaffold_7331	85.71	42	6	0	726	601	8554	8429	7e-101	89.1
Pasha-PB	scaffold_7331	81.97	61	11	0	1590	1408	10560	10378	7e-101	87.1
Pasha-PB	scaffold_7331	91.3	46	4	0	986	849	9172	9035	7e-101	86.1
Pasha-PB	scaffold_7331	91.67	24	2	0	74	3	7790	7719	7e-101	54
Pasha-PB	scaffold_7331	90.48	21	2	0	1191	1129	9777	9715	7e-101	53
Pasha-PB	scaffold_7331	93.75	16	1	0	1375	1328	10345	10298	7e-101	42.1
Pasha-PB	scaffold_7331	62.5	24	9	0	850	779	8788	8717	7e-101	34.2
Pasha-PB	scaffold_1019	40	40	24	0	1196	1315	15156	15037	0.073	41.1
Loquacious-PBa	scaffold_10062	100	84	0	0	1154	903	2104	1853	0	239
Loquacious-PBa	scaffold_10062	100	54	0	0	772	611	1176	1015	0	154
Loquacious-PBa	scaffold_10062	96.3	54	2	0	352	191	433	272	0	154
Loquacious-PBa	scaffold_10062	97.87	47	1	0	910	770	1694	1554	0	139
Loquacious-PBa	scaffold_10062	97.78	45	1	0	611	477	928	794	0	126
Loquacious-PBa	scaffold_10062	97.44	39	1	0	479	363	618	502	0	100
Loquacious-PBa	scaffold_10062	98.82	85	1	0	900	1154	1850	2104	0	236
Loquacious-PBa	scaffold_10062	100	53	0	0	613	771	1017	1175	0	152
Loquacious-PBa	scaffold_10062	98.08	52	1	0	192	347	273	428	0	147
Loquacious-PBa	scaffold_10062	97.78	45	1	0	478	612	795	929	0	133
Loquacious-PBa	scaffold_10062	100	46	0	0	771	908	1555	1692	0	130
Loquacious-PBa	scaffold_10062	88.37	43	5	0	351	479	490	618	0	92.6
Loquacious-PBa	scaffold_10062	97.65	85	2	0	1153	899	2103	1849	0	230
Loquacious-PBa	scaffold_10062	100	54	0	0	771	610	1175	1014	0	146
Loquacious-PBa	scaffold_10062	98.04	51	1	0	348	196	429	277	0	145
Loquacious-PBa	scaffold_10062	100	47	0	0	909	769	1693	1553	0	128
Loquacious-PBa	scaffold_10062	95.45	44	2	0	610	479	927	796	0	121
Loquacious-PBa	scaffold_10062	88.37	43	5	0	478	350	617	489	0	92.6
Loquacious-PBa	scaffold_10062	100	84	0	0	904	1155	1854	2105	0	225
Loquacious-PBa	scaffold_10062	100	54	0	0	611	772	1015	1176	0	153
Loquacious-PBa	scaffold_10062	98.08	52	1	0	193	348	274	429	0	138
Loquacious-PBa	scaffold_10062	100	46	0	0	772	909	1556	1693	0	124
Loquacious-PBa	scaffold_10062	97.73	44	1	0	480	611	797	928	0	108
Loquacious-PBa	scaffold_10062	86.84	38	5	0	365	478	504	617	0	88.1
Loquacious-PBa	scaffold_10062	98.81	84	1	0	1155	904	2105	1854	0	223
Loquacious-PBa	scaffold_10062	89.66	58	6	0	761	588	1165	992	0	145
Loquacious-PBa	scaffold_10062	100	42	0	0	320	195	401	276	0	112
Loquacious-PBa	scaffold_10062	97.44	39	1	0	612	496	929	813	0	107
Loquacious-PBa	scaffold_10062	100	37	0	0	908	798	1692	1582	0	100
Loquacious-PBa	scaffold_10062	92.86	28	2	0	432	349	571	488	0	72.3
Loquacious-PBa	scaffold_10062	100	54	0	0	612	773	1016	1177	8e-162	151
Loquacious-PBa	scaffold_10062	92.31	52	4	0	182	337	263	418	8e-162	135
Loquacious-PBa	scaffold_10062	100	43	0	0	770	898	1554	1682	8e-162	119
Loquacious-PBa	scaffold_10062	100	37	0	0	1043	1153	1993	2103	8e-162	108
Loquacious-PBa	scaffold_10062	93.55	31	2	0	479	571	796	888	8e-162	90.1
Loquacious-PBa	scaffold_10062	95.65	46	2	0	343	480	482	619	8e-162	82.2
Loquacious-PBa	scaffold_10062	95.65	23	1	0	944	1012	1894	1962	8e-162	30.7
Loquacious-PBa	scaffold_23794	96.92	65	2	0	196	2	830	1024	2e-48	194
Loquacious-PBa	scaffold_23794	96.92	65	2	0	3	197	1023	829	3e-46	188
Loquacious-PBa	scaffold_23794	96.92	65	2	0	2	196	1024	830	4e-46	187
Loquacious-PBa	scaffold_23794	96.92	65	2	0	195	1	831	1025	9e-45	183
Loquacious-PBa	scaffold_23794	90	40	4	0	91	210	935	816	1e-22	109
Loquacious-PBb	scaffold_10062	100	84	0	0	1142	891	2104	1853	0	239
Loquacious-PBb	scaffold_10062	100	54	0	0	760	599	1176	1015	0	154
Loquacious-PBb	scaffold_10062	98.08	52	1	0	351	196	432	277	0	148
Loquacious-PBb	scaffold_10062	97.87	47	1	0	898	758	1694	1554	0	139
Loquacious-PBb	scaffold_10062	97.78	45	1	0	599	465	928	794	0	126
Loquacious-PBb	scaffold_10062	85.11	47	7	0	467	327	618	478	0	106
Loquacious-PBb	scaffold_10062	98.82	85	1	0	888	1142	1850	2104	0	236
Loquacious-PBb	scaffold_10062	100	53	0	0	601	759	1017	1175	0	152
Loquacious-PBb	scaffold_10062	100	52	0	0	192	347	273	428	0	148
Loquacious-PBb	scaffold_10062	97.78	45	1	0	466	600	795	929	0	133
Loquacious-PBb	scaffold_10062	100	46	0	0	759	896	1555	1692	0	130
Loquacious-PBb	scaffold_10062	85.37	41	6	0	344	466	495	617	0	90.6
Loquacious-PBb	scaffold_10062	97.65	85	2	0	1141	887	2103	1849	0	230
Loquacious-PBb	scaffold_10062	98.18	55	1	0	355	191	436	272	0	157
Loquacious-PBb	scaffold_10062	100	54	0	0	759	598	1175	1014	0	146
Loquacious-PBb	scaffold_10062	100	47	0	0	897	757	1693	1553	0	128
Loquacious-PBb	scaffold_10062	97.73	44	1	0	598	467	927	796	0	123
Loquacious-PBb	scaffold_10062	87.18	39	5	0	466	350	617	501	0	84.1
Loquacious-PBb	scaffold_10062	100	84	0	0	892	1143	1854	2105	0	225
Loquacious-PBb	scaffold_10062	100	54	0	0	599	760	1015	1176	0	153
Loquacious-PBb	scaffold_10062	92.98	57	4	0	182	352	263	433	0	147
Loquacious-PBb	scaffold_10062	100	46	0	0	760	897	1556	1693	0	124
Loquacious-PBb	scaffold_10062	100	44	0	0	468	599	797	928	0	113
Loquacious-PBb	scaffold_10062	95.24	42	2	0	343	468	494	619	0	72.4
Loquacious-PBb	scaffold_10062	98.81	84	1	0	1143	892	2105	1854	1e-176	223
Loquacious-PBb	scaffold_10062	89.66	58	6	0	749	576	1165	992	1e-176	145
Loquacious-PBb	scaffold_10062	83.08	65	11	0	389	195	470	276	1e-176	141
Loquacious-PBb	scaffold_10062	100	39	0	0	600	484	929	813	1e-176	111
Loquacious-PBb	scaffold_10062	100	37	0	0	896	786	1692	1582	1e-176	100
Loquacious-PBb	scaffold_10062	100	54	0	0	600	761	1016	1177	5e-147	151
Loquacious-PBb	scaffold_10062	94.55	55	3	0	193	357	274	438	5e-147	140
Loquacious-PBb	scaffold_10062	100	43	0	0	758	886	1554	1682	5e-147	119
Loquacious-PBb	scaffold_10062	100	37	0	0	1031	1141	1993	2103	5e-147	108
Loquacious-PBb	scaffold_10062	96.77	31	1	0	467	559	796	888	5e-147	95.5
Loquacious-PBb	scaffold_10062	95.65	23	1	0	932	1000	1894	1962	5e-147	30.7
Loquacious-PBb	scaffold_10062	77.08	48	11	0	324	467	475	618	2e-15	85.6
Loquacious-PBb	scaffold_10062	91.67	24	2	0	420	349	571	500	2e-07	58.9
Loquacious-PBb	scaffold_23794	98.46	65	1	0	196	2	830	1024	6e-50	200
Loquacious-PBb	scaffold_23794	98.46	65	1	0	2	196	1024	830	8e-47	190
Loquacious-PBb	scaffold_23794	98.46	65	1	0	195	1	831	1025	2e-46	189
Loquacious-PBb	scaffold_23794	98.46	65	1	0	3	197	1023	829	3e-46	188
Loquacious-PBb	scaffold_23794	90	40	4	0	91	210	935	816	1e-22	109
Loquacious-PA	scaffold_10062	100	83	0	0	1007	759	2104	1856	0	234
Loquacious-PA	scaffold_10062	90.32	62	6	0	761	576	1177	992	0	155
Loquacious-PA	scaffold_10062	98.08	52	1	0	351	196	432	277	0	148
Loquacious-PA	scaffold_10062	97.78	45	1	0	599	465	928	794	0	126
Loquacious-PA	scaffold_10062	85.11	47	7	0	467	327	618	478	0	106
Loquacious-PA	scaffold_10062	100	83	0	0	759	1007	1856	2104	0	234
Loquacious-PA	scaffold_10062	100	54	0	0	601	762	1017	1178	0	154
Loquacious-PA	scaffold_10062	100	52	0	0	192	347	273	428	0	148
Loquacious-PA	scaffold_10062	97.78	45	1	0	466	600	795	929	0	133
Loquacious-PA	scaffold_10062	85.37	41	6	0	344	466	495	617	0	90.6
Loquacious-PA	scaffold_10062	97.62	84	2	0	1006	755	2103	1852	0	228
Loquacious-PA	scaffold_10062	98.18	55	1	0	355	191	436	272	0	157
Loquacious-PA	scaffold_10062	98.18	55	1	0	763	599	1179	1015	0	155
Loquacious-PA	scaffold_10062	97.73	44	1	0	598	467	927	796	0	123
Loquacious-PA	scaffold_10062	87.18	39	5	0	466	350	617	501	0	84.1
Loquacious-PA	scaffold_10062	98.81	84	1	0	757	1008	1854	2105	3e-172	223
Loquacious-PA	scaffold_10062	100	54	0	0	600	761	1016	1177	3e-172	151
Loquacious-PA	scaffold_10062	92.98	57	4	0	182	352	263	433	3e-172	147
Loquacious-PA	scaffold_10062	100	44	0	0	468	599	797	928	3e-172	113
Loquacious-PA	scaffold_10062	95.24	42	2	0	343	468	494	619	3e-172	72.3
Loquacious-PA	scaffold_10062	98.81	84	1	0	1008	757	2105	1854	5e-155	223
Loquacious-PA	scaffold_10062	100	55	0	0	762	598	1178	1014	5e-155	150
Loquacious-PA	scaffold_10062	83.08	65	11	0	389	195	470	276	5e-155	141
Loquacious-PA	scaffold_10062	100	39	0	0	600	484	929	813	5e-155	111
Loquacious-PA	scaffold_10062	100	51	0	0	599	751	1015	1167	6e-118	145
Loquacious-PA	scaffold_10062	94.55	55	3	0	193	357	274	438	6e-118	140
Loquacious-PA	scaffold_10062	100	37	0	0	896	1006	1993	2103	6e-118	108
Loquacious-PA	scaffold_10062	96.77	31	1	0	467	559	796	888	6e-118	95.5
Loquacious-PA	scaffold_10062	95.83	24	1	0	794	865	1891	1962	6e-118	35.2
Loquacious-PA	scaffold_10062	77.08	48	11	0	324	467	475	618	2e-15	85.6
Loquacious-PA	scaffold_10062	91.67	24	2	0	420	349	571	500	2e-07	58.9
Loquacious-PA	scaffold_23794	98.46	65	1	0	196	2	830	1024	5e-50	200
Loquacious-PA	scaffold_23794	98.46	65	1	0	2	196	1024	830	7e-47	190
Loquacious-PA	scaffold_23794	98.46	65	1	0	195	1	831	1025	1e-46	189
Loquacious-PA	scaffold_23794	98.46	65	1	0	3	197	1023	829	3e-46	188
Loquacious-PA	scaffold_23794	90	40	4	0	91	210	935	816	1e-22	109
Loquacious-PD	scaffold_10062	100	63	0	0	787	599	1203	1015	1e-136	182
Loquacious-PD	scaffold_10062	98.08	52	1	0	351	196	432	277	1e-136	148
Loquacious-PD	scaffold_10062	97.78	45	1	0	599	465	928	794	1e-136	126
Loquacious-PD	scaffold_10062	85.11	47	7	0	467	327	618	478	1e-136	106
Loquacious-PD	scaffold_10062	100	63	0	0	601	789	1017	1205	6e-133	178
Loquacious-PD	scaffold_10062	100	52	0	0	192	347	273	428	6e-133	148
Loquacious-PD	scaffold_10062	97.78	45	1	0	466	600	795	929	6e-133	132
Loquacious-PD	scaffold_10062	85.37	41	6	0	344	466	495	617	6e-133	90.6
Loquacious-PD	scaffold_10062	91.55	71	6	0	788	576	1204	992	2e-131	180
Loquacious-PD	scaffold_10062	98.18	55	1	0	355	191	436	272	2e-131	157
Loquacious-PD	scaffold_10062	97.73	44	1	0	598	467	927	796	2e-131	123
Loquacious-PD	scaffold_10062	87.18	39	5	0	466	350	617	501	2e-131	84.1
Loquacious-PD	scaffold_10062	100	63	0	0	599	787	1015	1203	2e-120	176
Loquacious-PD	scaffold_10062	92.98	57	4	0	182	352	263	433	2e-120	147
Loquacious-PD	scaffold_10062	100	44	0	0	468	599	797	928	2e-120	113
Loquacious-PD	scaffold_10062	95.24	42	2	0	343	468	494	619	2e-120	72
Loquacious-PD	scaffold_10062	100	64	0	0	789	598	1205	1014	7e-103	174
Loquacious-PD	scaffold_10062	83.08	65	11	0	389	195	470	276	7e-103	141
Loquacious-PD	scaffold_10062	100	39	0	0	600	484	929	813	7e-103	111
Loquacious-PD	scaffold_10062	100	63	0	0	600	788	1016	1204	3e-97	173
Loquacious-PD	scaffold_10062	94.55	55	3	0	193	357	274	438	3e-97	140
Loquacious-PD	scaffold_10062	96.77	31	1	0	467	559	796	888	3e-97	95.5
Loquacious-PD	scaffold_10062	77.08	48	11	0	324	467	475	618	1e-15	85.6
Loquacious-PD	scaffold_10062	91.67	24	2	0	420	349	571	500	1e-07	58.9
Loquacious-PD	scaffold_23794	98.46	65	1	0	196	2	830	1024	4e-50	200
Loquacious-PD	scaffold_23794	98.46	65	1	0	2	196	1024	830	5e-47	190
Loquacious-PD	scaffold_23794	98.46	65	1	0	195	1	831	1025	1e-46	189
Loquacious-PD	scaffold_23794	98.46	65	1	0	3	197	1023	829	2e-46	188
Loquacious-PD	scaffold_23794	90	40	4	0	91	210	935	816	1e-22	108
R2D2-PAa	scaffold_10062	55.56	18	8	0	145	198	494	547	0.018	26.7
R2D2-PAa	scaffold_10062	56.25	16	7	0	13	60	295	342	0.018	25.8
R2D2-PAa	scaffold_10062	36.67	30	19	0	70	159	349	438	0.018	23.3
R2D2-PAb	scaffold_10062	55.56	18	8	0	145	198	494	547	0.018	26.7
R2D2-PAb	scaffold_10062	56.25	16	7	0	13	60	295	342	0.018	25.8
R2D2-PAb	scaffold_10062	36.67	30	19	0	70	159	349	438	0.018	23.3
R2D2-PAc	scaffold_10062	55.56	18	8	0	145	198	494	547	0.018	26.7
R2D2-PAc	scaffold_10062	56.25	16	7	0	13	60	295	342	0.018	25.8
R2D2-PAc	scaffold_10062	36.67	30	19	0	70	159	349	438	0.018	23.3
Argonaute 1-PCa	scaffold_21014	100	114	0	0	18	359	923	1264	0	359
Argonaute 1-PCa	scaffold_21014	100	114	0	0	358	17	1263	922	0	336
Argonaute 1-PCa	scaffold_21014	94.19	86	5	0	799	542	2340	2083	0	240
Argonaute 1-PCa	scaffold_21014	100	82	0	0	1024	1269	3330	3575	0	237
Argonaute 1-PCa	scaffold_21014	98.77	81	1	0	797	555	2338	2096	0	236
Argonaute 1-PCa	scaffold_21014	98.77	81	1	0	555	797	2096	2338	0	236
Argonaute 1-PCa	scaffold_21014	100	81	0	0	556	798	2097	2339	0	236
Argonaute 1-PCa	scaffold_21014	98.78	82	1	0	1269	1024	3575	3330	0	226
Argonaute 1-PCa	scaffold_21014	100	80	0	0	1262	1023	3568	3329	0	222
Argonaute 1-PCa	scaffold_21014	100	75	0	0	799	1023	2664	2888	0	212
Argonaute 1-PCa	scaffold_21014	98.78	82	1	0	1025	1270	3331	3576	0	208
Argonaute 1-PCa	scaffold_21014	97.33	75	2	0	1023	799	2888	2664	0	205
Argonaute 1-PCa	scaffold_21014	100	68	0	0	556	353	1668	1465	0	202
Argonaute 1-PCa	scaffold_21014	96.1	77	3	0	794	1024	2659	2889	0	199
Argonaute 1-PCa	scaffold_21014	100	69	0	0	355	561	1467	1673	0	194
Argonaute 1-PCa	scaffold_21014	100	63	0	0	169	357	1074	1262	0	189
Argonaute 1-PCa	scaffold_21014	100	68	0	0	353	556	1465	1668	0	188
Argonaute 1-PCa	scaffold_21014	98.55	69	1	0	558	352	1670	1464	0	187
Argonaute 1-PCa	scaffold_21014	100	64	0	0	357	166	1262	1071	0	186
Argonaute 1-PCa	scaffold_21014	94.92	59	3	0	1269	1445	3668	3844	0	159
Argonaute 1-PCa	scaffold_21014	98.25	57	1	0	1434	1264	3833	3663	0	158
Argonaute 1-PCa	scaffold_21014	98.25	57	1	0	1264	1434	3663	3833	0	157
Argonaute 1-PCa	scaffold_21014	100	48	0	0	1411	1268	3810	3667	0	141
Argonaute 1-PCa	scaffold_21014	100	46	0	0	1022	885	2887	2750	0	127
Argonaute 1-PCa	scaffold_21014	100	17	0	0	69	19	974	924	0	59.4
Argonaute 1-PCa	scaffold_21014	100	20	0	0	907	848	2772	2713	0	58.4
Argonaute 1-PCa	scaffold_21014	95	20	1	0	854	795	2719	2660	0	52.5
Argonaute 1-PCa	scaffold_21014	85.71	21	3	0	11	73	916	978	0	46
Argonaute 1-PCa	scaffold_21014	97.56	82	2	0	554	799	2095	2340	0	206
Argonaute 1-PCa	scaffold_21014	94.94	79	4	0	801	1037	2666	2902	0	197
Argonaute 1-PCa	scaffold_21014	100	68	0	0	354	557	1466	1669	0	185
Argonaute 1-PCa	scaffold_21014	98.39	62	1	0	176	361	1081	1266	0	173
Argonaute 1-PCa	scaffold_21014	100	55	0	0	1268	1432	3667	3831	0	157
Argonaute 1-PCa	scaffold_21014	100	39	0	0	1152	1268	3458	3574	0	111
Argonaute 1-PCa	scaffold_21014	96.43	28	1	0	1023	1106	3329	3412	0	75.2
Argonaute 1-PCa	scaffold_21014	97.56	82	2	0	798	553	2339	2094	0	217
Argonaute 1-PCa	scaffold_21014	98.78	82	1	0	1267	1022	3573	3328	0	214
Argonaute 1-PCa	scaffold_21014	100	68	0	0	557	354	1669	1466	0	180
Argonaute 1-PCa	scaffold_21014	100	63	0	0	356	168	1261	1073	0	172
Argonaute 1-PCa	scaffold_21014	100	45	0	0	1433	1299	3832	3698	0	133
Argonaute 1-PCa	scaffold_21014	93.94	33	2	0	1024	926	2889	2791	0	83.2
Argonaute 1-PCa	scaffold_2889	99.05	105	1	0	2425	2739	35181	34867	5e-172	304
Argonaute 1-PCa	scaffold_2889	98.46	65	1	0	2236	2430	35550	35356	5e-172	186
Argonaute 1-PCa	scaffold_2889	92.65	68	5	0	2044	2247	35848	35645	5e-172	177
Argonaute 1-PCa	scaffold_2889	100	103	0	0	2738	2430	34868	35176	1e-159	304
Argonaute 1-PCa	scaffold_2889	94.12	68	4	0	2441	2238	35345	35548	1e-159	176
Argonaute 1-PCa	scaffold_2889	94.34	53	3	0	2246	2088	35646	35804	1e-159	146
Argonaute 1-PCa	scaffold_2889	98.44	64	1	0	2238	2429	35548	35357	3e-118	181
Argonaute 1-PCa	scaffold_2889	96.49	57	2	0	2067	2237	35825	35655	3e-118	167
Argonaute 1-PCa	scaffold_2889	100	42	0	0	2535	2660	35071	34946	3e-118	123
Argonaute 1-PCa	scaffold_2889	93.75	16	1	0	2433	2480	35173	35126	3e-118	43.1
Argonaute 1-PCa	scaffold_2889	95.59	68	3	0	2430	2227	35356	35559	4e-86	169
Argonaute 1-PCa	scaffold_2889	96.55	58	2	0	2233	2060	35659	35832	4e-86	145
Argonaute 1-PCa	scaffold_2889	100	15	0	0	2479	2435	35127	35171	4e-86	45.5
Argonaute 1-PCa	scaffold_2889	100	13	0	0	2572	2534	35034	35072	4e-86	42.6
Argonaute 1-PCa	scaffold_2889	100	11	0	0	2523	2491	35083	35115	4e-86	29.2
Argonaute 1-PCa	scaffold_2889	96.55	58	2	0	2060	2233	35832	35659	2e-58	159
Argonaute 1-PCa	scaffold_2889	98.15	54	1	0	2270	2431	35516	35355	2e-58	100
Argonaute 1-PCa	scaffold_2889	97.87	47	1	0	2431	2291	35355	35495	1e-50	133
Argonaute 1-PCa	scaffold_2889	97.37	38	1	0	2238	2125	35654	35767	1e-50	100
Argonaute 1-PCa	scaffold_36002	98.39	62	1	0	1557	1742	122	307	4e-117	176
Argonaute 1-PCa	scaffold_36002	100	57	0	0	1744	1914	535	705	4e-117	152
Argonaute 1-PCa	scaffold_36002	96.3	54	2	0	1900	2061	1278	1439	4e-117	146
Argonaute 1-PCa	scaffold_36002	98.39	62	1	0	1746	1561	311	126	1e-112	177
Argonaute 1-PCa	scaffold_36002	98.25	57	1	0	1913	1743	704	534	1e-112	155
Argonaute 1-PCa	scaffold_36002	100	45	0	0	2045	1911	1423	1289	1e-112	128
Argonaute 1-PCa	scaffold_36002	98.21	56	1	0	1745	1912	536	703	1e-85	151
Argonaute 1-PCa	scaffold_36002	98.39	62	1	0	1558	1743	123	308	1e-85	148
Argonaute 1-PCa	scaffold_36002	100	38	0	0	1911	2024	1289	1402	1e-85	70.8
Argonaute 1-PCa	scaffold_36002	94.74	57	3	0	1914	1744	705	535	5e-74	152
Argonaute 1-PCa	scaffold_36002	88.41	69	8	0	1742	1536	307	101	5e-74	144
Argonaute 1-PCa	scaffold_36002	100	25	0	0	1984	1910	1362	1288	5e-74	34.2
Argonaute 1-PCa	scaffold_36002	94.64	56	3	0	1912	1745	703	536	9e-70	143
Argonaute 1-PCa	scaffold_36002	100	51	0	0	1744	1592	309	157	9e-70	142
Argonaute 1-PCa	scaffold_36002	100	10	0	0	1938	1909	1316	1287	9e-70	31.7
Argonaute 1-PCa	scaffold_36002	92.98	57	4	0	1746	1916	537	707	2e-61	148
Argonaute 1-PCa	scaffold_36002	98.08	52	1	0	1592	1747	157	312	2e-61	115
Argonaute 1-PCa	scaffold_36002	88.89	9	1	0	1907	1933	1285	1311	2e-61	24.8
Argonaute 1-PCa	scaffold_452	57.14	63	27	0	2413	2601	79269	79457	2e-35	105
Argonaute 1-PCa	scaffold_452	33.33	48	32	0	2056	2199	77854	77997	2e-35	43.1
Argonaute 1-PCa	scaffold_452	40	35	21	0	1090	1194	72763	72867	2e-35	42.1
Argonaute 1-PCa	scaffold_452	68.75	16	5	0	2254	2301	78452	78499	2e-35	35.6
Argonaute 1-PCa	scaffold_452	27.5	40	29	0	1741	1860	75927	76046	2e-35	33.7
Argonaute 1-PCa	scaffold_452	48.15	27	14	0	1327	1407	74109	74189	2e-35	33.2
Argonaute 1-PCa	scaffold_406	57.14	63	27	0	2413	2601	65802	65614	5e-35	105
Argonaute 1-PCa	scaffold_406	33.33	48	32	0	2056	2199	67386	67243	5e-35	43.1
Argonaute 1-PCa	scaffold_406	43.75	32	18	0	1099	1194	72210	72115	5e-35	41.1
Argonaute 1-PCa	scaffold_406	68.75	16	5	0	2254	2301	66593	66546	5e-35	35.6
Argonaute 1-PCa	scaffold_406	27.5	40	29	0	1741	1860	68974	68855	5e-35	33.7
Argonaute 1-PCa	scaffold_406	48.15	27	14	0	1327	1407	70972	70892	5e-35	33.2
Argonaute 1-PCa	scaffold_2650	44.62	65	36	0	2395	2589	19122	18928	9e-16	73.3
Argonaute 1-PCa	scaffold_2650	36	50	32	0	2158	2307	19926	19777	9e-16	44.1
Argonaute 1-PCa	scaffold_6476	34.78	69	45	0	2101	2307	13251	13457	4e-15	58.4
Argonaute 1-PCa	scaffold_6476	40.43	47	28	0	2491	2631	13891	14031	4e-15	47
Argonaute 1-PCa	scaffold_6476	50	20	10	0	1330	1389	11789	11848	4e-15	33.2
Argonaute 1-PCa	scaffold_213	44.62	65	36	0	2395	2589	151519	151325	4e-15	73.3
Argonaute 1-PCa	scaffold_213	36	50	32	0	2158	2307	152307	152158	4e-15	44.1
Argonaute 1-PCa	scaffold_6502	42.55	47	27	0	2491	2631	11144	11004	2e-09	51
Argonaute 1-PCa	scaffold_6502	50	28	14	0	2131	2214	12112	12029	2e-09	43.6
Argonaute 1-PCa	scaffold_11823	44.44	45	25	0	2491	2625	6437	6303	1e-07	49
Argonaute 1-PCa	scaffold_11823	48	25	13	0	2140	2214	7602	7528	1e-07	38.6
Argonaute 1-PCa	scaffold_2791	44.44	45	25	0	2491	2625	30984	31118	4e-07	49
Argonaute 1-PCa	scaffold_2791	48	25	13	0	2140	2214	29658	29732	4e-07	38.6
Argonaute 1-PCa	scaffold_2796	51.61	31	15	0	2547	2639	38016	38108	0.029	36.1
Argonaute 1-PCa	scaffold_2796	47.37	19	10	0	144	200	37304	37360	0.029	34.7
Argonaute 1-PCa	scaffold_1913	51.61	31	15	0	2547	2639	46194	46102	0.04	36.1
Argonaute 1-PCa	scaffold_1913	47.37	19	10	0	144	200	46906	46850	0.04	34.7
Argonaute 1-PCa	scaffold_5719	58.33	24	10	0	2556	2627	6380	6451	0.047	42.6
Argonaute 1-PCa	scaffold_6478	50	32	16	0	2556	2651	6780	6875	0.068	35.6
Argonaute 1-PCa	scaffold_6478	46.67	15	8	0	144	188	4092	4136	0.068	29.2
Argonaute 1-PCa	scaffold_6478	33.33	27	18	0	1607	1687	4934	5014	0.068	26.7
Argonaute 1-PCb	scaffold_21014	100	114	0	0	18	359	923	1264	0	359
Argonaute 1-PCb	scaffold_21014	100	114	0	0	358	17	1263	922	0	336
Argonaute 1-PCb	scaffold_21014	94.19	86	5	0	799	542	2340	2083	0	240
Argonaute 1-PCb	scaffold_21014	100	82	0	0	1024	1269	3330	3575	0	237
Argonaute 1-PCb	scaffold_21014	98.77	81	1	0	797	555	2338	2096	0	236
Argonaute 1-PCb	scaffold_21014	98.77	81	1	0	555	797	2096	2338	0	236
Argonaute 1-PCb	scaffold_21014	100	81	0	0	556	798	2097	2339	0	236
Argonaute 1-PCb	scaffold_21014	98.78	82	1	0	1269	1024	3575	3330	0	226
Argonaute 1-PCb	scaffold_21014	100	80	0	0	1262	1023	3568	3329	0	222
Argonaute 1-PCb	scaffold_21014	100	75	0	0	799	1023	2664	2888	0	212
Argonaute 1-PCb	scaffold_21014	98.78	82	1	0	1025	1270	3331	3576	0	208
Argonaute 1-PCb	scaffold_21014	97.33	75	2	0	1023	799	2888	2664	0	205
Argonaute 1-PCb	scaffold_21014	100	68	0	0	556	353	1668	1465	0	202
Argonaute 1-PCb	scaffold_21014	96.1	77	3	0	794	1024	2659	2889	0	199
Argonaute 1-PCb	scaffold_21014	100	69	0	0	355	561	1467	1673	0	194
Argonaute 1-PCb	scaffold_21014	100	63	0	0	169	357	1074	1262	0	189
Argonaute 1-PCb	scaffold_21014	100	68	0	0	353	556	1465	1668	0	188
Argonaute 1-PCb	scaffold_21014	98.55	69	1	0	558	352	1670	1464	0	187
Argonaute 1-PCb	scaffold_21014	100	64	0	0	357	166	1262	1071	0	186
Argonaute 1-PCb	scaffold_21014	94.92	59	3	0	1269	1445	3668	3844	0	159
Argonaute 1-PCb	scaffold_21014	98.25	57	1	0	1434	1264	3833	3663	0	158
Argonaute 1-PCb	scaffold_21014	98.25	57	1	0	1264	1434	3663	3833	0	157
Argonaute 1-PCb	scaffold_21014	100	48	0	0	1411	1268	3810	3667	0	141
Argonaute 1-PCb	scaffold_21014	100	46	0	0	1022	885	2887	2750	0	127
Argonaute 1-PCb	scaffold_21014	100	17	0	0	69	19	974	924	0	59.4
Argonaute 1-PCb	scaffold_21014	100	20	0	0	907	848	2772	2713	0	58.4
Argonaute 1-PCb	scaffold_21014	95	20	1	0	854	795	2719	2660	0	52.5
Argonaute 1-PCb	scaffold_21014	85.71	21	3	0	11	73	916	978	0	46
Argonaute 1-PCb	scaffold_21014	97.56	82	2	0	554	799	2095	2340	0	206
Argonaute 1-PCb	scaffold_21014	94.94	79	4	0	801	1037	2666	2902	0	197
Argonaute 1-PCb	scaffold_21014	100	68	0	0	354	557	1466	1669	0	185
Argonaute 1-PCb	scaffold_21014	98.39	62	1	0	176	361	1081	1266	0	173
Argonaute 1-PCb	scaffold_21014	100	55	0	0	1268	1432	3667	3831	0	157
Argonaute 1-PCb	scaffold_21014	100	39	0	0	1152	1268	3458	3574	0	111
Argonaute 1-PCb	scaffold_21014	96.43	28	1	0	1023	1106	3329	3412	0	75.2
Argonaute 1-PCb	scaffold_21014	97.56	82	2	0	798	553	2339	2094	0	217
Argonaute 1-PCb	scaffold_21014	98.78	82	1	0	1267	1022	3573	3328	0	214
Argonaute 1-PCb	scaffold_21014	100	68	0	0	557	354	1669	1466	0	180
Argonaute 1-PCb	scaffold_21014	100	63	0	0	356	168	1261	1073	0	172
Argonaute 1-PCb	scaffold_21014	100	45	0	0	1433	1299	3832	3698	0	133
Argonaute 1-PCb	scaffold_21014	93.94	33	2	0	1024	926	2889	2791	0	83.2
Argonaute 1-PCb	scaffold_2889	99.05	105	1	0	2473	2787	35181	34867	3e-178	304
Argonaute 1-PCb	scaffold_2889	98.46	65	1	0	2284	2478	35550	35356	3e-178	186
Argonaute 1-PCb	scaffold_2889	96.61	59	2	0	2109	2285	35831	35655	3e-178	172
Argonaute 1-PCb	scaffold_2889	100	17	0	0	2059	2109	36629	36579	3e-178	53
Argonaute 1-PCb	scaffold_2889	100	103	0	0	2786	2478	34868	35176	1e-173	304
Argonaute 1-PCb	scaffold_2889	94.12	68	4	0	2489	2286	35345	35548	1e-173	176
Argonaute 1-PCb	scaffold_2889	95.24	63	3	0	2294	2106	35646	35834	1e-173	173
Argonaute 1-PCb	scaffold_2889	100	17	0	0	2108	2058	36580	36630	1e-173	47
Argonaute 1-PCb	scaffold_2889	98.44	64	1	0	2286	2477	35548	35357	2e-125	181
Argonaute 1-PCb	scaffold_2889	95.24	63	3	0	2107	2295	35833	35645	2e-125	171
Argonaute 1-PCb	scaffold_2889	100	42	0	0	2583	2708	35071	34946	2e-125	123
Argonaute 1-PCb	scaffold_2889	81.82	22	4	0	2043	2108	36645	36580	2e-125	46.5
Argonaute 1-PCb	scaffold_2889	93.75	16	1	0	2481	2528	35173	35126	2e-125	43.1
Argonaute 1-PCb	scaffold_2889	95.59	68	3	0	2478	2275	35356	35559	8e-87	169
Argonaute 1-PCb	scaffold_2889	87.69	65	8	0	2281	2087	35659	35853	8e-87	148
Argonaute 1-PCb	scaffold_2889	100	15	0	0	2527	2483	35127	35171	8e-87	45.5
Argonaute 1-PCb	scaffold_2889	100	13	0	0	2620	2582	35034	35072	8e-87	42.6
Argonaute 1-PCb	scaffold_2889	100	11	0	0	2571	2539	35083	35115	8e-87	29.2
Argonaute 1-PCb	scaffold_2889	94.83	58	3	0	2108	2281	35832	35659	3e-63	156
Argonaute 1-PCb	scaffold_2889	98.15	54	1	0	2318	2479	35516	35355	3e-63	100
Argonaute 1-PCb	scaffold_2889	94.44	18	1	0	2060	2113	36628	36575	3e-63	46.5
Argonaute 1-PCb	scaffold_2889	97.87	47	1	0	2479	2339	35355	35495	9e-55	133
Argonaute 1-PCb	scaffold_2889	97.37	38	1	0	2286	2173	35654	35767	9e-55	100
Argonaute 1-PCb	scaffold_2889	93.33	15	1	0	2113	2069	36575	36619	9e-55	41.1
Argonaute 1-PCb	scaffold_36002	98.39	62	1	0	1746	1561	311	126	5e-118	177
Argonaute 1-PCb	scaffold_36002	98.25	57	1	0	1913	1743	704	534	5e-118	155
Argonaute 1-PCb	scaffold_36002	100	50	0	0	2060	1911	1438	1289	5e-118	146
Argonaute 1-PCb	scaffold_36002	98.39	62	1	0	1557	1742	122	307	3e-116	176
Argonaute 1-PCb	scaffold_36002	100	57	0	0	1744	1914	535	705	3e-116	152
Argonaute 1-PCb	scaffold_36002	96.23	53	2	0	1900	2058	1278	1436	3e-116	143
Argonaute 1-PCb	scaffold_36002	98.21	56	1	0	1745	1912	536	703	1e-95	151
Argonaute 1-PCb	scaffold_36002	98.39	62	1	0	1558	1743	123	308	1e-95	148
Argonaute 1-PCb	scaffold_36002	100	50	0	0	1911	2060	1289	1438	1e-95	103
Argonaute 1-PCb	scaffold_36002	94.74	57	3	0	1914	1744	705	535	5e-74	152
Argonaute 1-PCb	scaffold_36002	88.41	69	8	0	1742	1536	307	101	5e-74	144
Argonaute 1-PCb	scaffold_36002	100	25	0	0	1984	1910	1362	1288	5e-74	34.2
Argonaute 1-PCb	scaffold_36002	94.64	56	3	0	1912	1745	703	536	1e-69	143
Argonaute 1-PCb	scaffold_36002	100	51	0	0	1744	1592	309	157	1e-69	142
Argonaute 1-PCb	scaffold_36002	100	10	0	0	1938	1909	1316	1287	1e-69	31.7
Argonaute 1-PCb	scaffold_36002	92.98	57	4	0	1746	1916	537	707	2e-61	148
Argonaute 1-PCb	scaffold_36002	98.08	52	1	0	1592	1747	157	312	2e-61	115
Argonaute 1-PCb	scaffold_36002	88.89	9	1	0	1907	1933	1285	1311	2e-61	24.8
Argonaute 1-PCb	scaffold_452	57.14	63	27	0	2461	2649	79269	79457	2e-35	105
Argonaute 1-PCb	scaffold_452	32.65	49	33	0	2101	2247	77851	77997	2e-35	43.1
Argonaute 1-PCb	scaffold_452	40	35	21	0	1090	1194	72763	72867	2e-35	42.1
Argonaute 1-PCb	scaffold_452	68.75	16	5	0	2302	2349	78452	78499	2e-35	35.6
Argonaute 1-PCb	scaffold_452	27.5	40	29	0	1741	1860	75927	76046	2e-35	33.7
Argonaute 1-PCb	scaffold_452	48.15	27	14	0	1327	1407	74109	74189	2e-35	33.2
Argonaute 1-PCb	scaffold_406	57.14	63	27	0	2461	2649	65802	65614	5e-35	105
Argonaute 1-PCb	scaffold_406	32.65	49	33	0	2101	2247	67389	67243	5e-35	43.1
Argonaute 1-PCb	scaffold_406	43.75	32	18	0	1099	1194	72210	72115	5e-35	41.1
Argonaute 1-PCb	scaffold_406	68.75	16	5	0	2302	2349	66593	66546	5e-35	35.6
Argonaute 1-PCb	scaffold_406	27.5	40	29	0	1741	1860	68974	68855	5e-35	33.7
Argonaute 1-PCb	scaffold_406	48.15	27	14	0	1327	1407	70972	70892	5e-35	33.2
Argonaute 1-PCb	scaffold_2650	44.62	65	36	0	2443	2637	19122	18928	9e-16	73.3
Argonaute 1-PCb	scaffold_2650	36	50	32	0	2206	2355	19926	19777	9e-16	44.1
Argonaute 1-PCb	scaffold_6476	34.78	69	45	0	2149	2355	13251	13457	4e-15	58.4
Argonaute 1-PCb	scaffold_6476	40.43	47	28	0	2539	2679	13891	14031	4e-15	47
Argonaute 1-PCb	scaffold_6476	50	20	10	0	1330	1389	11789	11848	4e-15	33.2
Argonaute 1-PCb	scaffold_213	44.62	65	36	0	2443	2637	151519	151325	4e-15	73.3
Argonaute 1-PCb	scaffold_213	36	50	32	0	2206	2355	152307	152158	4e-15	44.1
Argonaute 1-PCb	scaffold_6502	42.55	47	27	0	2539	2679	11144	11004	2e-09	51
Argonaute 1-PCb	scaffold_6502	50	28	14	0	2179	2262	12112	12029	2e-09	43.6
Argonaute 1-PCb	scaffold_11823	44.44	45	25	0	2539	2673	6437	6303	1e-07	49
Argonaute 1-PCb	scaffold_11823	48	25	13	0	2188	2262	7602	7528	1e-07	38.6
Argonaute 1-PCb	scaffold_2791	44.44	45	25	0	2539	2673	30984	31118	4e-07	49
Argonaute 1-PCb	scaffold_2791	48	25	13	0	2188	2262	29658	29732	4e-07	38.6
Argonaute 1-PCb	scaffold_2796	51.61	31	15	0	2595	2687	38016	38108	0.03	36.1
Argonaute 1-PCb	scaffold_2796	47.37	19	10	0	144	200	37304	37360	0.03	34.7
Argonaute 1-PCb	scaffold_1913	51.61	31	15	0	2595	2687	46194	46102	0.041	36.1
Argonaute 1-PCb	scaffold_1913	47.37	19	10	0	144	200	46906	46850	0.041	34.7
Argonaute 1-PCb	scaffold_5719	58.33	24	10	0	2604	2675	6380	6451	0.047	42.6
Argonaute 1-PCb	scaffold_6478	50	32	16	0	2604	2699	6780	6875	0.072	35.6
Argonaute 1-PCb	scaffold_6478	46.67	15	8	0	144	188	4092	4136	0.072	29.2
Argonaute 1-PCb	scaffold_6478	33.33	27	18	0	1607	1687	4934	5014	0.072	26.7
Argonaute 1-PCb	scaffold_1091	41.18	34	20	0	2142	2243	75928	75827	0.086	32.7
Argonaute 1-PCb	scaffold_1091	55.56	18	8	0	1995	2048	75991	75938	0.086	26.2
Argonaute 2-PEa	scaffold_406	98.53	136	2	0	935	528	76113	76520	0	376
Argonaute 2-PEa	scaffold_406	91.6	119	10	0	153	509	76895	76539	0	277
Argonaute 2-PEa	scaffold_406	97.65	85	2	0	682	936	76366	76112	0	246
Argonaute 2-PEa	scaffold_406	96.47	85	3	0	709	455	76339	76593	0	203
Argonaute 2-PEa	scaffold_406	98.53	68	1	0	2986	3189	65805	65602	0	198
Argonaute 2-PEa	scaffold_406	98.51	67	1	0	187	387	76861	76661	0	185
Argonaute 2-PEa	scaffold_406	92.86	70	5	0	3195	2986	65596	65805	0	180
Argonaute 2-PEa	scaffold_406	96.61	59	2	0	729	553	76319	76495	0	180
Argonaute 2-PEa	scaffold_406	95.52	67	3	0	3187	2987	65604	65804	0	177
Argonaute 2-PEa	scaffold_406	95.52	67	3	0	2987	3187	65804	65604	0	175
Argonaute 2-PEa	scaffold_406	95.52	67	3	0	2988	3188	65803	65603	0	173
Argonaute 2-PEa	scaffold_406	95.24	63	3	0	937	1125	75940	75752	0	168
Argonaute 2-PEa	scaffold_406	100	58	0	0	1555	1728	72971	72798	0	163
Argonaute 2-PEa	scaffold_406	94.83	58	3	0	2340	2167	69527	69700	0	152
Argonaute 2-PEa	scaffold_406	96.97	66	2	0	527	724	76521	76324	0	152
Argonaute 2-PEa	scaffold_406	100	56	0	0	2167	2334	69700	69533	0	152
Argonaute 2-PEa	scaffold_406	96.49	57	2	0	1727	1557	72799	72969	0	148
Argonaute 2-PEa	scaffold_406	90.57	53	5	0	936	778	76112	76270	0	146
Argonaute 2-PEa	scaffold_406	96.43	56	2	0	2332	2165	69535	69702	0	145
Argonaute 2-PEa	scaffold_406	98.21	56	1	0	2333	2166	69534	69701	0	143
Argonaute 2-PEa	scaffold_406	98.25	57	1	0	2168	2338	69699	69529	0	143
Argonaute 2-PEa	scaffold_406	94.92	59	3	0	1115	939	75762	75938	0	142
Argonaute 2-PEa	scaffold_406	96.3	54	2	0	2166	2327	69701	69540	0	140
Argonaute 2-PEa	scaffold_406	91.53	59	5	0	1113	937	75764	75940	0	137
Argonaute 2-PEa	scaffold_406	85.45	55	8	0	1396	1560	73486	73322	0	135
Argonaute 2-PEa	scaffold_406	84.48	58	9	0	1728	1555	72798	72971	0	135
Argonaute 2-PEa	scaffold_406	85.25	61	9	0	936	1118	75941	75759	0	134
Argonaute 2-PEa	scaffold_406	78.33	60	13	0	1554	1733	72972	72793	0	134
Argonaute 2-PEa	scaffold_406	90.38	52	5	0	780	935	76268	76113	0	133
Argonaute 2-PEa	scaffold_406	92	50	4	0	785	934	76263	76114	0	133
Argonaute 2-PEa	scaffold_406	95.74	47	2	0	2644	2784	67383	67243	0	127
Argonaute 2-PEa	scaffold_406	86.27	51	7	0	2782	2630	67245	67397	0	127
Argonaute 2-PEa	scaffold_406	95.12	41	2	0	600	722	76448	76326	0	126
Argonaute 2-PEa	scaffold_406	91.67	48	4	0	2640	2783	67387	67244	0	124
Argonaute 2-PEa	scaffold_406	89.58	48	5	0	1557	1414	73325	73468	0	123
Argonaute 2-PEa	scaffold_406	88.14	59	7	0	938	1114	75939	75763	0	123
Argonaute 2-PEa	scaffold_406	88.68	53	6	0	937	779	76111	76269	0	122
Argonaute 2-PEa	scaffold_406	100	43	0	0	1927	2055	70999	70871	0	120
Argonaute 2-PEa	scaffold_406	79.66	59	12	0	1732	1556	72794	72970	0	120
Argonaute 2-PEa	scaffold_406	93.48	46	3	0	2781	2644	67246	67383	0	119
Argonaute 2-PEa	scaffold_406	92.68	41	3	0	2554	2432	68299	68421	0	119
Argonaute 2-PEa	scaffold_406	100	40	0	0	1303	1422	73893	73774	0	117
Argonaute 2-PEa	scaffold_406	95.45	44	2	0	2057	1926	70869	71000	0	117
Argonaute 2-PEa	scaffold_406	89.36	47	5	0	1558	1418	73324	73464	0	116
Argonaute 2-PEa	scaffold_406	91.11	45	4	0	1425	1559	73457	73323	0	112
Argonaute 2-PEa	scaffold_406	95.12	41	2	0	2434	2556	68419	68297	0	112
Argonaute 2-PEa	scaffold_406	97.44	39	1	0	2053	2169	70337	70221	0	111
Argonaute 2-PEa	scaffold_406	95.12	41	2	0	2556	2434	68297	68419	0	111
Argonaute 2-PEa	scaffold_406	89.13	46	5	0	1415	1552	73467	73330	0	111
Argonaute 2-PEa	scaffold_406	90.91	44	4	0	2055	1924	70871	71002	0	110
Argonaute 2-PEa	scaffold_406	92.86	42	3	0	1929	2054	70997	70872	0	110
Argonaute 2-PEa	scaffold_406	89.58	48	5	0	2639	2782	67388	67245	0	110
Argonaute 2-PEa	scaffold_406	97.5	40	1	0	2555	2436	68298	68417	0	108
Argonaute 2-PEa	scaffold_406	95	40	2	0	2436	2555	68417	68298	0	108
Argonaute 2-PEa	scaffold_406	97.37	38	1	0	2166	2053	70224	70337	0	107
Argonaute 2-PEa	scaffold_406	100	37	0	0	2888	2778	66547	66657	0	106
Argonaute 2-PEa	scaffold_406	97.22	36	1	0	2437	2330	68860	68967	0	105
Argonaute 2-PEa	scaffold_406	100	36	0	0	2438	2331	68859	68966	0	105
Argonaute 2-PEa	scaffold_406	100	37	0	0	2779	2889	66656	66546	0	104
Argonaute 2-PEa	scaffold_406	92.5	40	3	0	1421	1302	73775	73894	0	103
Argonaute 2-PEa	scaffold_406	89.74	39	4	0	2887	2771	66548	66664	0	102
Argonaute 2-PEa	scaffold_406	86.36	44	6	0	1598	1729	72928	72797	0	102
Argonaute 2-PEa	scaffold_406	97.3	37	1	0	2055	2165	70335	70225	0	102
Argonaute 2-PEa	scaffold_406	92.68	41	3	0	2174	2052	70216	70338	0	101
Argonaute 2-PEa	scaffold_406	77.27	44	10	0	1723	1854	72213	72082	0	101
Argonaute 2-PEa	scaffold_406	92.5	40	3	0	2323	2442	68974	68855	0	101
Argonaute 2-PEa	scaffold_406	80	45	9	0	1434	1300	73762	73896	0	100
Argonaute 2-PEa	scaffold_406	97.14	35	1	0	1301	1197	74330	74434	0	99
Argonaute 2-PEa	scaffold_406	97.3	37	1	0	1819	1929	71726	71616	0	99.2
Argonaute 2-PEa	scaffold_406	89.74	39	4	0	2771	2887	66664	66548	0	99.5
Argonaute 2-PEa	scaffold_406	100	32	0	0	2783	2688	67244	67339	0	99
Argonaute 2-PEa	scaffold_406	85	40	6	0	1302	1421	73894	73775	0	99
Argonaute 2-PEa	scaffold_406	97.3	37	1	0	2164	2054	70226	70336	0	98.5
Argonaute 2-PEa	scaffold_406	97.3	37	1	0	2054	2164	70336	70226	0	98.5
Argonaute 2-PEa	scaffold_406	100	35	0	0	2887	2991	66255	66151	0	98.2
Argonaute 2-PEa	scaffold_406	97.5	40	1	0	2435	2554	68418	68299	0	98
Argonaute 2-PEa	scaffold_406	91.67	36	3	0	1195	1302	74436	74329	0	97.2
Argonaute 2-PEa	scaffold_406	92.11	38	3	0	2442	2329	68855	68968	0	97
Argonaute 2-PEa	scaffold_406	91.89	37	3	0	2886	2776	66549	66659	0	96.5
Argonaute 2-PEa	scaffold_406	89.19	37	4	0	1929	1819	71616	71726	0	95
Argonaute 2-PEa	scaffold_406	100	34	0	0	2987	2886	66155	66256	0	94.5
Argonaute 2-PEa	scaffold_406	97.14	35	1	0	1925	1821	71620	71724	0	94.5
Argonaute 2-PEa	scaffold_406	96.88	32	1	0	3188	3283	65061	64966	0	94.5
Argonaute 2-PEa	scaffold_406	100	32	0	0	3285	3190	64964	65059	0	94
Argonaute 2-PEa	scaffold_406	85.37	41	6	0	1301	1423	73895	73773	0	93
Argonaute 2-PEa	scaffold_406	89.47	38	4	0	2778	2891	66657	66544	0	93
Argonaute 2-PEa	scaffold_406	100	32	0	0	3283	3188	64966	65061	0	92.6
Argonaute 2-PEa	scaffold_406	100	31	0	0	2646	2554	67876	67968	0	92.1
Argonaute 2-PEa	scaffold_406	91.43	35	3	0	3180	3284	65069	64965	0	90.6
Argonaute 2-PEa	scaffold_406	94.29	35	2	0	224	328	76824	76720	0	90.1
Argonaute 2-PEa	scaffold_406	90	40	4	0	2056	1937	70870	70989	0	89.6
Argonaute 2-PEa	scaffold_406	100	31	0	0	2554	2646	67968	67876	0	89.3
Argonaute 2-PEa	scaffold_406	100	31	0	0	2553	2645	67969	67877	0	89.1
Argonaute 2-PEa	scaffold_406	100	32	0	0	3190	3285	65059	64964	0	88.4
Argonaute 2-PEa	scaffold_406	85.37	41	6	0	1423	1301	73773	73895	0	87.6
Argonaute 2-PEa	scaffold_406	96.97	33	1	0	3188	3090	65603	65701	0	86.6
Argonaute 2-PEa	scaffold_406	96.77	31	1	0	2644	2552	67878	67970	0	86.6
Argonaute 2-PEa	scaffold_406	94.12	34	2	0	327	226	76721	76822	0	84.1
Argonaute 2-PEa	scaffold_406	96.77	31	1	0	1817	1725	72119	72211	0	83.6
Argonaute 2-PEa	scaffold_406	88.89	36	4	0	1045	938	75832	75939	0	83.6
Argonaute 2-PEa	scaffold_406	100	31	0	0	2645	2553	67877	67969	0	82.2
Argonaute 2-PEa	scaffold_406	100	31	0	0	2555	2647	67967	67875	0	81.7
Argonaute 2-PEa	scaffold_406	100	27	0	0	556	636	76492	76412	0	80
Argonaute 2-PEa	scaffold_406	89.8	49	5	0	1559	1413	73323	73469	0	79.2
Argonaute 2-PEa	scaffold_406	85.29	34	5	0	1303	1202	74328	74429	0	77.7
Argonaute 2-PEa	scaffold_406	80.56	36	7	0	1302	1195	74329	74436	0	77.7
Argonaute 2-PEa	scaffold_406	75.76	33	8	0	1825	1727	72111	72209	0	77.2
Argonaute 2-PEa	scaffold_406	100	29	0	0	1114	1200	75116	75030	0	76.5
Argonaute 2-PEa	scaffold_406	83.33	36	6	0	1197	1304	74434	74327	0	76.7
Argonaute 2-PEa	scaffold_406	88.57	35	4	0	1821	1925	71724	71620	0	74.7
Argonaute 2-PEa	scaffold_406	70.27	37	11	0	2997	2887	66145	66255	0	74.2
Argonaute 2-PEa	scaffold_406	96.67	30	1	0	1202	1113	75028	75117	0	74.2
Argonaute 2-PEa	scaffold_406	96.15	26	1	0	2361	2438	68936	68859	0	74.2
Argonaute 2-PEa	scaffold_406	78.12	32	7	0	1209	1114	75021	75116	0	71.3
Argonaute 2-PEa	scaffold_406	100	25	0	0	3059	2985	65732	65806	0	70.3
Argonaute 2-PEa	scaffold_406	81.25	32	6	0	1821	1726	72115	72210	0	69.8
Argonaute 2-PEa	scaffold_406	96	25	1	0	223	149	76825	76899	0	69.8
Argonaute 2-PEa	scaffold_406	81.25	32	6	0	1727	1822	72209	72114	0	69.8
Argonaute 2-PEa	scaffold_406	86.21	29	4	0	1201	1115	75029	75115	0	67.3
Argonaute 2-PEa	scaffold_406	71.43	35	10	0	2882	2986	66260	66156	0	66.3
Argonaute 2-PEa	scaffold_406	72.73	33	9	0	2986	2888	66156	66254	0	65.3
Argonaute 2-PEa	scaffold_406	86.21	29	4	0	1115	1201	75115	75029	0	63.9
Argonaute 2-PEa	scaffold_406	83.33	30	5	0	1116	1205	75114	75025	0	63.9
Argonaute 2-PEa	scaffold_406	88	25	3	0	1894	1820	71651	71725	0	62.4
Argonaute 2-PEa	scaffold_406	89.47	19	2	0	147	91	76901	76957	0	62.4
Argonaute 2-PEa	scaffold_406	78.12	32	7	0	1728	1823	72208	72113	0	62.4
Argonaute 2-PEa	scaffold_406	93.02	43	3	0	1928	2056	70998	70870	0	59.9
Argonaute 2-PEa	scaffold_406	100	21	0	0	382	320	76666	76728	0	58.9
Argonaute 2-PEa	scaffold_406	68.57	35	11	0	2883	2987	66259	66155	0	58.9
Argonaute 2-PEa	scaffold_406	82.61	23	4	0	407	475	76641	76573	0	52.5
Argonaute 2-PEa	scaffold_406	100	17	0	0	2330	2380	68967	68917	0	50
Argonaute 2-PEa	scaffold_406	96.88	32	1	0	281	186	76767	76862	0	49
Argonaute 2-PEa	scaffold_406	94.12	17	1	0	106	56	76942	76992	0	46
Argonaute 2-PEa	scaffold_406	80.56	36	7	0	1196	1303	74435	74328	0	43.6
Argonaute 2-PEa	scaffold_406	100	13	0	0	386	348	76662	76700	0	38.1
Argonaute 2-PEa	scaffold_406	91.67	12	1	0	60	95	76988	76953	0	33.2
Argonaute 2-PEa	scaffold_406	58.82	17	7	0	730	780	76336	76286	0	33.1
Argonaute 2-PEa	scaffold_406	52.94	17	8	0	712	762	76318	76268	0	32.6
Argonaute 2-PEa	scaffold_406	100	9	0	0	470	444	76578	76604	0	32.2
Argonaute 2-PEa	scaffold_406	100	11	0	0	3284	3252	64965	64997	0	31.2
Argonaute 2-PEa	scaffold_406	55.56	18	8	0	782	729	76284	76337	0	30.7
Argonaute 2-PEa	scaffold_406	70	50	15	0	1820	1969	71725	71576	2e-16	83.6
Argonaute 2-PEa	scaffold_406	40	35	21	0	259	363	76807	76703	2e-16	38
Argonaute 2-PEa	scaffold_452	93.28	119	8	0	153	509	66868	67224	0	289
Argonaute 2-PEa	scaffold_452	98.04	102	2	0	935	630	67647	67342	0	275
Argonaute 2-PEa	scaffold_452	96.47	85	3	0	682	936	67394	67648	0	244
Argonaute 2-PEa	scaffold_452	98.53	68	1	0	2986	3189	79266	79469	0	198
Argonaute 2-PEa	scaffold_452	97.01	67	2	0	187	387	66902	67102	0	182
Argonaute 2-PEa	scaffold_452	95.52	67	3	0	2987	3187	79267	79467	0	176
Argonaute 2-PEa	scaffold_452	86.49	74	10	0	3207	2986	79487	79266	0	171
Argonaute 2-PEa	scaffold_452	92.54	67	5	0	3187	2987	79467	79267	0	170
Argonaute 2-PEa	scaffold_452	95.24	63	3	0	937	1125	67828	68016	0	168
Argonaute 2-PEa	scaffold_452	92.54	67	5	0	2988	3188	79268	79468	0	165
Argonaute 2-PEa	scaffold_452	100	58	0	0	1555	1728	72063	72236	0	163
Argonaute 2-PEa	scaffold_452	96.23	53	2	0	936	778	67648	67490	0	159
Argonaute 2-PEa	scaffold_452	100	56	0	0	2167	2334	75416	75583	0	152
Argonaute 2-PEa	scaffold_452	93.1	58	4	0	2340	2167	75589	75416	0	150
Argonaute 2-PEa	scaffold_452	81.67	60	11	0	1554	1733	72062	72241	0	150
Argonaute 2-PEa	scaffold_452	98.31	59	1	0	1115	939	68006	67830	0	149
Argonaute 2-PEa	scaffold_452	96.43	56	2	0	2332	2165	75581	75414	0	147
Argonaute 2-PEa	scaffold_452	98.08	52	1	0	780	935	67492	67647	0	146
Argonaute 2-PEa	scaffold_452	98	50	1	0	785	934	67497	67646	0	145
Argonaute 2-PEa	scaffold_452	98.21	56	1	0	2333	2166	75582	75415	0	143
Argonaute 2-PEa	scaffold_452	92.98	57	4	0	1727	1557	72235	72065	0	143
Argonaute 2-PEa	scaffold_452	96.3	54	2	0	2166	2327	75415	75576	0	142
Argonaute 2-PEa	scaffold_452	91.53	59	5	0	1113	937	68004	67828	0	141
Argonaute 2-PEa	scaffold_452	94.34	53	3	0	937	779	67649	67491	0	140
Argonaute 2-PEa	scaffold_452	87.93	58	7	0	1728	1555	72236	72063	0	139
Argonaute 2-PEa	scaffold_452	94.74	57	3	0	2168	2338	75417	75587	0	137
Argonaute 2-PEa	scaffold_452	88.52	61	7	0	936	1118	67827	68009	0	136
Argonaute 2-PEa	scaffold_452	78.69	61	13	0	1378	1560	71539	71721	0	136
Argonaute 2-PEa	scaffold_452	91.53	59	5	0	938	1114	67829	68005	0	132
Argonaute 2-PEa	scaffold_452	83.05	59	10	0	1732	1556	72240	72064	0	130
Argonaute 2-PEa	scaffold_452	92	50	4	0	2644	2793	77857	78006	0	129
Argonaute 2-PEa	scaffold_452	89.8	49	5	0	1560	1414	71721	71575	0	126
Argonaute 2-PEa	scaffold_452	89.58	48	5	0	2640	2783	77853	77996	0	124
Argonaute 2-PEa	scaffold_452	84.31	51	8	0	2782	2630	77995	77843	0	123
Argonaute 2-PEa	scaffold_452	91.8	61	5	0	637	455	67352	67170	0	123
Argonaute 2-PEa	scaffold_452	97.56	41	1	0	2554	2432	76485	76363	0	122
Argonaute 2-PEa	scaffold_452	100	41	0	0	2556	2434	76487	76365	0	120
Argonaute 2-PEa	scaffold_452	100	43	0	0	1927	2055	74082	74210	0	120
Argonaute 2-PEa	scaffold_452	97.73	44	1	0	2057	1926	74212	74081	0	120
Argonaute 2-PEa	scaffold_452	91.49	47	4	0	1558	1418	71719	71579	0	119
Argonaute 2-PEa	scaffold_452	91.49	47	4	0	1425	1565	71586	71726	0	118
Argonaute 2-PEa	scaffold_452	100	40	0	0	2436	2555	76367	76486	0	118
Argonaute 2-PEa	scaffold_452	100	40	0	0	1303	1422	71184	71303	0	117
Argonaute 2-PEa	scaffold_452	89.8	49	5	0	2790	2644	78003	77857	0	114
Argonaute 2-PEa	scaffold_452	97.56	41	1	0	2434	2556	76365	76487	0	114
Argonaute 2-PEa	scaffold_452	91.3	46	4	0	1415	1552	71576	71713	0	113
Argonaute 2-PEa	scaffold_452	95	40	2	0	2053	2172	74732	74851	0	113
Argonaute 2-PEa	scaffold_452	100	40	0	0	2555	2436	76486	76367	0	112
Argonaute 2-PEa	scaffold_452	100	38	0	0	2888	2775	78498	78385	0	111
Argonaute 2-PEa	scaffold_452	97.5	40	1	0	1421	1302	71302	71183	0	109
Argonaute 2-PEa	scaffold_452	100	37	0	0	2441	2331	76045	75935	0	108
Argonaute 2-PEa	scaffold_452	90.48	42	4	0	1929	2054	74084	74209	0	107
Argonaute 2-PEa	scaffold_452	87.5	48	6	0	2639	2782	77852	77995	0	107
Argonaute 2-PEa	scaffold_452	100	38	0	0	2776	2889	78386	78499	0	107
Argonaute 2-PEa	scaffold_452	90.91	44	4	0	2055	1924	74210	74079	0	106
Argonaute 2-PEa	scaffold_452	88.64	44	5	0	1598	1729	72106	72237	0	106
Argonaute 2-PEa	scaffold_452	94.59	37	2	0	2887	2777	78497	78387	0	105
Argonaute 2-PEa	scaffold_452	97.22	36	1	0	2437	2330	76041	75934	0	104
Argonaute 2-PEa	scaffold_452	100	35	0	0	632	528	67347	67243	0	104
Argonaute 2-PEa	scaffold_452	89.47	38	4	0	2166	2053	74845	74732	0	103
Argonaute 2-PEa	scaffold_452	100	40	0	0	2435	2554	76366	76485	0	102
Argonaute 2-PEa	scaffold_452	94.59	37	2	0	2886	2776	78496	78386	0	101
Argonaute 2-PEa	scaffold_452	92.5	40	3	0	2323	2442	75927	76046	0	101
Argonaute 2-PEa	scaffold_452	97.06	34	1	0	2789	2688	78002	77901	0	100
Argonaute 2-PEa	scaffold_452	94.59	37	2	0	2777	2887	78387	78497	0	100
Argonaute 2-PEa	scaffold_452	97.14	35	1	0	1301	1197	70832	70728	0	99
Argonaute 2-PEa	scaffold_452	87.5	40	5	0	1302	1421	71183	71302	0	99.5
Argonaute 2-PEa	scaffold_452	96.97	33	1	0	1723	1821	72769	72867	0	99.2
[truncated: 411 more rows]

## Sheet: Transcriptome - corn OGS2.2
tBLASTx against sfru_Corn_variant_OGS2.2_transcripts, BLOSUM80 scoring matrix, otherwise default settings
http://bipaa.genouest.org/blast/sfru/
Query	Sequence hits	Positives (%)	No. Identities	No. Differences	Gaps	Query start	Query End	Subject Start	Subject End	E-value	Score (Bits)
Drosha-PA	GSSPFG00029988001.2-RA	99.53	215	1	0	3562	4206	1	645	4e-172	603
Drosha-PA	GSSPFG00029988001.2-RA	89.77	215	22	0	4206	3562	645	1	7e-143	506
Drosha-PA	GSSPFG00029988001.2-RA	89.05	210	23	0	3564	4193	3	632	1e-138	492
Drosha-PA	GSSPFG00029988001.2-RA	89.1	211	23	0	3572	4204	11	643	7e-136	483
Drosha-PA	GSSPFG00029988001.2-RA	98.46	65	1	0	3758	3564	197	3	2e-99	186
Drosha-PA	GSSPFG00029988001.2-RA	100	30	0	0	4205	4116	644	555	2e-99	83.2
Drosha-PA	GSSPFG00029988001.2-RA	92.59	27	2	0	4120	4040	559	479	2e-99	76.7
Drosha-PA	GSSPFG00029988001.2-RA	89.47	38	4	0	3970	3857	409	296	2e-99	65.3
Drosha-PA	GSSPFG00029988001.2-RA	100	7	0	0	3830	3810	269	249	2e-99	28.7
Drosha-PA	GSSPFG00029988001.2-RA	95.31	64	3	0	3754	3563	193	2	5e-77	175
Drosha-PA	GSSPFG00029988001.2-RA	96.3	27	1	0	4070	3990	509	429	5e-77	72.3
Drosha-PA	GSSPFG00029988001.2-RA	100	19	0	0	3947	3891	386	330	5e-77	55.4
Drosha-PA	GSSPFG00029988001.2-RA	85	20	3	0	4204	4145	643	584	5e-77	54
Drosha-PA	GSSPFG00029987001-RA	94.32	88	5	0	3	266	2199	2462	1e-61	237
Drosha-PA	GSSPFG00029987001-RA	91.8	61	5	0	283	101	2479	2297	6e-45	149
Drosha-PA	GSSPFG00029987001-RA	100	16	0	0	48	1	2244	2197	6e-45	52
Drosha-PA	GSSPFG00029987001-RA	100	32	0	0	282	187	2478	2383	2e-26	101
Drosha-PA	GSSPFG00029987001-RA	100	16	0	0	49	2	2245	2198	2e-26	44.6
Drosha-PA	GSSPFG00029987001-RA	100	22	0	0	211	276	2407	2472	1e-24	69.8
Drosha-PA	GSSPFG00029987001-RA	100	16	0	0	2	49	2198	2245	1e-24	49
Drosha-PA	GSSPFG00029987001-RA	76.92	13	3	0	134	172	2330	2368	1e-24	32.2
Drosha-PA	GSSPFG00029987001-RA	100	20	0	0	224	283	2420	2479	1e-09	61.9
Drosha-PA	GSSPFG00029987001-RA	100	9	0	0	1	27	2197	2223	1e-09	27.7
Drosha-PA	GSSPFG00030950001.2-RA	35.09	57	37	0	2701	2871	344	514	6e-05	45.5
Drosha-PA	GSSPFG00030950001.2-RA	61.54	13	5	0	3457	3495	671	709	6e-05	26.7
Drosha-PA	GSSPFG00026578001-RA	51.85	27	13	0	3430	3350	1663	1583	0.007	41.6
Drosha-PA	GSSPFG00034307001-RA	51.22	41	20	0	3238	3360	595	717	0.014	36.1
Drosha-PA	GSSPFG00034307001-RA	50	18	9	0	2920	2973	133	186	0.014	27.7
Drosha-PA	GSSPFG00031307001.2-RA	51.22	41	20	0	3238	3360	1375	1497	0.022	36.1
Drosha-PA	GSSPFG00031307001.2-RA	50	18	9	0	2920	2973	943	996	0.022	27.7
Drosha-PA	GSSPFG00023747001-RA	45.83	24	13	0	3700	3629	1096	1025	0.051	33.2
Drosha-PA	GSSPFG00023747001-RA	64.29	14	5	0	3272	3231	901	860	0.051	29.2
Drosha-PA	GSSPFG00013617001-RA	54.55	22	10	0	3026	3091	1628	1693	0.054	33.2
Drosha-PA	GSSPFG00013617001-RA	43.48	23	13	0	2970	3038	1454	1522	0.054	22.8
Drosha-PA	GSSPFG00003806001.1-RA	47.83	23	12	0	2762	2694	2740	2672	0.056	38.6
Drosha-PA	GSSPFG00034309001.2-RA	51.22	41	20	0	3238	3360	6865	6987	0.071	36.1
Drosha-PA	GSSPFG00034309001.2-RA	50	18	9	0	2920	2973	6490	6543	0.071	27.7
Drosha-PA	GSSPFG00018580001.2-RA	45	20	11	0	2245	2186	452	393	0.078	30.2
Drosha-PA	GSSPFG00018580001.2-RA	75	12	3	0	2265	2230	516	481	0.078	25.3
Drosha-PA	GSSPFG00021599001-RA	41.18	34	20	0	3537	3638	483	584	0.079	38.1
Dicer-1-PA	GSSPFG00034309001.2-RA	99.07	642	6	0	4603	6528	5593	7518	0	1745
Dicer-1-PA	GSSPFG00034309001.2-RA	94.96	337	17	0	631	1641	619	1629	0	779
Dicer-1-PA	GSSPFG00034309001.2-RA	89.12	285	31	0	4946	5800	5936	6790	0	644
Dicer-1-PA	GSSPFG00034309001.2-RA	85.16	283	42	0	1609	761	1597	749	0	641
Dicer-1-PA	GSSPFG00034309001.2-RA	96.31	244	9	0	6122	5391	7112	6381	0	622
Dicer-1-PA	GSSPFG00034309001.2-RA	86.35	249	34	0	5022	5768	6012	6758	0	513
Dicer-1-PA	GSSPFG00034309001.2-RA	97.09	172	5	0	2761	3276	3793	4308	0	478
Dicer-1-PA	GSSPFG00034309001.2-RA	95.95	173	7	0	3278	2760	4310	3792	0	459
Dicer-1-PA	GSSPFG00034309001.2-RA	99.35	155	1	0	2299	2763	3229	3693	0	452
Dicer-1-PA	GSSPFG00034309001.2-RA	97.66	171	4	0	16	528	1	513	0	420
Dicer-1-PA	GSSPFG00034309001.2-RA	96.15	156	6	0	2765	2298	3695	3228	0	414
Dicer-1-PA	GSSPFG00034309001.2-RA	95.38	173	8	0	2126	1608	2465	1947	0	411
Dicer-1-PA	GSSPFG00034309001.2-RA	97.45	157	4	0	1526	1056	1514	1044	0	404
Dicer-1-PA	GSSPFG00034309001.2-RA	86.31	168	23	0	618	1121	606	1109	0	395
Dicer-1-PA	GSSPFG00034309001.2-RA	98.58	141	2	0	3460	3882	4522	4944	0	391
Dicer-1-PA	GSSPFG00034309001.2-RA	87.13	171	22	0	5826	5314	6816	6304	0	382
Dicer-1-PA	GSSPFG00034309001.2-RA	88.2	161	19	0	5491	5009	6481	5999	0	381
Dicer-1-PA	GSSPFG00034309001.2-RA	90.85	142	13	0	3180	2755	4212	3787	0	358
Dicer-1-PA	GSSPFG00034309001.2-RA	99.19	123	1	0	1609	1977	1948	2316	0	353
Dicer-1-PA	GSSPFG00034309001.2-RA	90.26	154	15	0	2300	2761	3230	3691	0	349
Dicer-1-PA	GSSPFG00034309001.2-RA	84.21	171	27	0	528	16	513	1	0	348
Dicer-1-PA	GSSPFG00034309001.2-RA	90.26	154	15	0	2760	2299	3690	3229	0	343
Dicer-1-PA	GSSPFG00034309001.2-RA	90.32	155	15	0	2761	2297	3691	3227	0	342
Dicer-1-PA	GSSPFG00034309001.2-RA	87.22	133	17	0	4579	4181	5587	5189	0	330
Dicer-1-PA	GSSPFG00034309001.2-RA	89.47	133	14	0	2756	3154	3788	4186	0	326
Dicer-1-PA	GSSPFG00034309001.2-RA	88.57	140	16	0	3885	3466	4947	4528	0	321
Dicer-1-PA	GSSPFG00034309001.2-RA	83.22	149	25	0	1155	1601	1143	1589	0	317
Dicer-1-PA	GSSPFG00034309001.2-RA	85.25	122	18	0	1608	1973	1947	2312	0	298
Dicer-1-PA	GSSPFG00034309001.2-RA	80.14	146	29	0	520	83	505	68	0	294
Dicer-1-PA	GSSPFG00034309001.2-RA	90.76	119	11	0	4608	4964	5598	5954	0	293
Dicer-1-PA	GSSPFG00034309001.2-RA	96.26	107	4	0	5268	4948	6258	5938	0	285
Dicer-1-PA	GSSPFG00034309001.2-RA	83.06	124	21	0	1963	1592	2302	1931	0	283
Dicer-1-PA	GSSPFG00034309001.2-RA	97.14	105	3	0	5264	4950	6254	5940	0	282
Dicer-1-PA	GSSPFG00034309001.2-RA	92.93	99	7	0	5850	6146	6840	7136	0	270
Dicer-1-PA	GSSPFG00034309001.2-RA	96.55	116	4	0	6527	6180	7517	7170	0	251
Dicer-1-PA	GSSPFG00034309001.2-RA	83.78	111	18	0	6195	6527	7185	7517	0	248
Dicer-1-PA	GSSPFG00034309001.2-RA	87.83	115	14	0	1269	925	1257	913	0	240
Dicer-1-PA	GSSPFG00034309001.2-RA	98.91	92	1	0	4009	4284	5017	5292	0	229
Dicer-1-PA	GSSPFG00034309001.2-RA	87.9	124	15	0	1980	1609	2319	1948	0	228
Dicer-1-PA	GSSPFG00034309001.2-RA	98.92	93	1	0	3743	3465	4805	4527	0	218
Dicer-1-PA	GSSPFG00034309001.2-RA	100	69	0	0	4375	4581	5383	5589	0	199
Dicer-1-PA	GSSPFG00034309001.2-RA	89.87	79	8	0	1533	1297	1521	1285	0	196
Dicer-1-PA	GSSPFG00034309001.2-RA	85.9	78	11	0	2298	2531	3228	3461	0	193
Dicer-1-PA	GSSPFG00034309001.2-RA	84.71	85	13	0	306	560	291	545	0	188
Dicer-1-PA	GSSPFG00034309001.2-RA	88.89	81	9	0	1298	1540	1286	1528	0	187
Dicer-1-PA	GSSPFG00034309001.2-RA	86.67	75	10	0	4581	4357	5589	5365	0	186
Dicer-1-PA	GSSPFG00034309001.2-RA	93.24	74	5	0	3202	2981	4234	4013	0	182
Dicer-1-PA	GSSPFG00034309001.2-RA	95.24	63	3	0	3268	3456	4366	4554	0	182
Dicer-1-PA	GSSPFG00034309001.2-RA	95.4	87	4	0	278	18	263	3	0	182
Dicer-1-PA	GSSPFG00034309001.2-RA	87.65	81	10	0	873	631	861	619	0	179
Dicer-1-PA	GSSPFG00034309001.2-RA	88.89	81	9	0	4649	4891	5639	5881	0	173
Dicer-1-PA	GSSPFG00034309001.2-RA	89.33	75	8	0	848	624	836	612	0	169
Dicer-1-PA	GSSPFG00034309001.2-RA	92.65	68	5	0	4809	4606	5799	5596	0	167
Dicer-1-PA	GSSPFG00034309001.2-RA	82.05	78	14	0	5767	5534	6757	6524	0	167
Dicer-1-PA	GSSPFG00034309001.2-RA	100	56	0	0	2032	2199	2371	2538	0	164
Dicer-1-PA	GSSPFG00034309001.2-RA	87.34	79	10	0	1031	1267	1019	1255	0	163
Dicer-1-PA	GSSPFG00034309001.2-RA	93.65	63	4	0	3458	3270	4556	4368	0	162
Dicer-1-PA	GSSPFG00034309001.2-RA	84.62	65	10	0	3459	3653	4521	4715	0	160
Dicer-1-PA	GSSPFG00034309001.2-RA	87.88	66	8	0	791	988	779	976	0	159
Dicer-1-PA	GSSPFG00034309001.2-RA	88.33	60	7	0	6107	6286	7097	7276	0	159
Dicer-1-PA	GSSPFG00034309001.2-RA	78.12	96	21	0	113	400	98	385	0	158
Dicer-1-PA	GSSPFG00034309001.2-RA	91.67	60	5	0	3270	3449	4368	4547	0	157
Dicer-1-PA	GSSPFG00034309001.2-RA	85.94	64	9	0	4104	4295	5112	5303	0	157
Dicer-1-PA	GSSPFG00034309001.2-RA	85.37	82	12	0	18	263	3	248	0	151
Dicer-1-PA	GSSPFG00034309001.2-RA	89.06	64	7	0	3698	3889	4760	4951	0	150
Dicer-1-PA	GSSPFG00034309001.2-RA	81.54	65	12	0	6526	6332	7516	7322	0	146
Dicer-1-PA	GSSPFG00034309001.2-RA	83.54	79	13	0	4245	4009	5253	5017	0	144
Dicer-1-PA	GSSPFG00034309001.2-RA	86.89	61	8	0	3699	3881	4761	4943	0	142
Dicer-1-PA	GSSPFG00034309001.2-RA	90.32	62	6	0	515	330	500	315	0	138
Dicer-1-PA	GSSPFG00034309001.2-RA	82.76	58	10	0	2209	2036	2548	2375	0	135
Dicer-1-PA	GSSPFG00034309001.2-RA	100	47	0	0	4742	4602	5732	5592	0	134
Dicer-1-PA	GSSPFG00034309001.2-RA	84.48	58	9	0	3467	3640	4529	4702	0	132
Dicer-1-PA	GSSPFG00034309001.2-RA	81.03	58	11	0	6528	6355	7518	7345	0	131
Dicer-1-PA	GSSPFG00034309001.2-RA	89.09	55	6	0	2763	2927	3795	3959	0	130
Dicer-1-PA	GSSPFG00034309001.2-RA	89.39	66	7	0	6306	6109	7296	7099	0	127
Dicer-1-PA	GSSPFG00034309001.2-RA	100	43	0	0	4319	4191	5327	5199	0	123
Dicer-1-PA	GSSPFG00034309001.2-RA	90.38	52	5	0	2917	2762	3949	3794	0	119
Dicer-1-PA	GSSPFG00034309001.2-RA	95.35	43	2	0	2988	3116	4020	4148	0	116
Dicer-1-PA	GSSPFG00034309001.2-RA	81.82	55	10	0	6362	6526	7352	7516	0	116
Dicer-1-PA	GSSPFG00034309001.2-RA	80.39	51	10	0	2046	2198	2385	2537	0	113
Dicer-1-PA	GSSPFG00034309001.2-RA	89.58	48	5	0	4792	4649	5782	5639	0	113
Dicer-1-PA	GSSPFG00034309001.2-RA	81.82	55	10	0	2199	2035	2538	2374	0	112
Dicer-1-PA	GSSPFG00034309001.2-RA	82.35	51	9	0	3613	3461	4675	4523	0	107
Dicer-1-PA	GSSPFG00034309001.2-RA	83.33	48	8	0	4383	4526	5391	5534	0	105
Dicer-1-PA	GSSPFG00034309001.2-RA	93.48	46	3	0	617	754	605	742	0	103
Dicer-1-PA	GSSPFG00034309001.2-RA	92.86	42	3	0	4957	4832	5947	5822	0	100
Dicer-1-PA	GSSPFG00034309001.2-RA	94.74	38	2	0	410	523	395	508	0	96
Dicer-1-PA	GSSPFG00034309001.2-RA	91.89	37	3	0	4358	4468	5366	5476	0	96
Dicer-1-PA	GSSPFG00034309001.2-RA	97.14	35	1	0	4508	4404	5516	5412	0	94.5
Dicer-1-PA	GSSPFG00034309001.2-RA	85	60	9	0	3964	3785	5026	4847	0	94.5
Dicer-1-PA	GSSPFG00034309001.2-RA	91.18	34	3	0	1019	918	1007	906	0	90.1
Dicer-1-PA	GSSPFG00034309001.2-RA	93.94	33	2	0	2664	2762	3594	3692	0	85.6
Dicer-1-PA	GSSPFG00034309001.2-RA	85.29	34	5	0	6280	6179	7270	7169	0	83.6
Dicer-1-PA	GSSPFG00034309001.2-RA	97.37	38	1	0	3448	3335	4546	4433	0	83.2
Dicer-1-PA	GSSPFG00034309001.2-RA	96.15	26	1	0	3869	3792	4931	4854	0	79.7
Dicer-1-PA	GSSPFG00034309001.2-RA	96.3	27	1	0	6069	5989	7059	6979	0	77.2
Dicer-1-PA	GSSPFG00034309001.2-RA	100	29	0	0	717	631	639	553	0	75.7
Dicer-1-PA	GSSPFG00034309001.2-RA	96.43	28	1	0	4889	4806	5879	5796	0	70.8
Dicer-1-PA	GSSPFG00034309001.2-RA	91.67	24	2	0	3156	3227	4188	4259	0	68.3
Dicer-1-PA	GSSPFG00034309001.2-RA	95.65	23	1	0	6058	5990	7048	6980	0	66.8
Dicer-1-PA	GSSPFG00034309001.2-RA	94.44	18	1	0	2571	2624	3501	3554	0	51.5
Dicer-1-PA	GSSPFG00034309001.2-RA	91.43	35	3	0	4220	4324	5228	5332	0	50
Dicer-1-PA	GSSPFG00034309001.2-RA	88.89	18	2	0	4526	4579	5534	5587	0	45.1
Dicer-1-PA	GSSPFG00034309001.2-RA	93.75	16	1	0	6023	6070	7013	7060	0	43.1
Dicer-1-PA	GSSPFG00034309001.2-RA	100	15	0	0	3365	3409	4463	4507	0	41.6
Dicer-1-PA	GSSPFG00034309001.2-RA	78.95	19	4	0	2296	2240	3058	3002	0	40.1
Dicer-1-PA	GSSPFG00034309001.2-RA	100	15	0	0	2251	2295	3013	3057	0	39.6
Dicer-1-PA	GSSPFG00034309001.2-RA	76.47	17	4	0	2298	2248	3060	3010	0	38.1
Dicer-1-PA	GSSPFG00034309001.2-RA	82.35	17	3	0	2241	2291	3003	3053	0	37.6
Dicer-1-PA	GSSPFG00034309001.2-RA	87.5	16	2	0	2297	2250	3059	3012	0	36.1
Dicer-1-PA	GSSPFG00034309001.2-RA	100	13	0	0	3736	3698	4798	4760	0	35.6
Dicer-1-PA	GSSPFG00034309001.2-RA	87.5	16	2	0	4896	4849	5886	5839	0	35.2
Dicer-1-PA	GSSPFG00034309001.2-RA	100	11	0	0	3405	3373	4503	4471	0	33.2
Dicer-1-PA	GSSPFG00034309001.2-RA	91.67	12	1	0	4145	4110	5153	5118	0	31.7
Dicer-1-PA	GSSPFG00034309001.2-RA	84	25	4	0	3342	3268	4440	4366	0	31.7
Dicer-1-PA	GSSPFG00034309001.2-RA	81.82	11	2	0	3267	3235	4299	4267	0	30.7
Dicer-1-PA	GSSPFG00034309001.2-RA	100	10	0	0	2198	2169	2537	2508	0	28.7
Dicer-1-PA	GSSPFG00034309001.2-RA	84.62	13	2	0	5920	5882	6910	6872	0	27.7
Dicer-1-PA	GSSPFG00034309001.2-RA	88.89	9	1	0	4580	4554	5588	5562	0	26.7
Dicer-1-PA	GSSPFG00034309001.2-RA	88.89	9	1	0	6142	6116	7132	7106	0	25.3
Dicer-1-PA	GSSPFG00034309001.2-RA	100	7	0	0	3245	3265	4277	4297	0	23.8
Dicer-1-PA	GSSPFG00034309001.2-RA	76	25	6	0	4049	4123	5057	5131	0	23.8
Dicer-1-PA	GSSPFG00034309001.2-RA	70.45	44	13	0	618	749	573	704	1e-64	92.1
Dicer-1-PA	GSSPFG00034309001.2-RA	79.49	39	8	0	2084	2200	2423	2539	1e-64	80.7
Dicer-1-PA	GSSPFG00034309001.2-RA	81.82	33	6	0	1610	1708	1949	2047	1e-64	78.2
Dicer-1-PA	GSSPFG00034309001.2-RA	95.45	22	1	0	1814	1879	2153	2218	1e-64	58.9
Dicer-1-PA	GSSPFG00034309001.2-RA	88.24	17	2	0	1928	1978	2267	2317	1e-64	39.1
Dicer-1-PA	GSSPFG00034309001.2-RA	81.25	16	3	0	2249	2296	3011	3058	1e-64	27.7
Dicer-1-PA	GSSPFG00034309001.2-RA	72.5	40	11	0	630	749	552	671	1e-17	91.1
Dicer-1-PA	GSSPFG00034309001.2-RA	88.1	42	5	0	617	742	572	697	6e-17	89.1
Dicer-1-PA	GSSPFG00034309001.2-RA	89.19	37	4	0	632	742	554	664	1e-14	81.2
Dicer-1-PA	GSSPFG00034309001.2-RA	65	40	14	0	630	749	519	638	4e-14	79.7
Dicer-1-PA	GSSPFG00034309001.2-RA	78.12	32	7	0	621	716	642	737	4e-14	79.7
Dicer-1-PA	GSSPFG00034309001.2-RA	73.68	38	10	0	628	741	583	696	2e-13	77.2
Dicer-1-PA	GSSPFG00034309001.2-RA	75.68	37	9	0	631	741	553	663	3e-13	76.7
Dicer-1-PA	GSSPFG00034309001.2-RA	77.5	40	9	0	750	631	705	586	9e-12	71.8
Dicer-1-PA	GSSPFG00034309001.2-RA	68.29	41	13	0	750	628	639	517	1e-11	71.3
Dicer-1-PA	GSSPFG00034309001.2-RA	75	40	10	0	740	621	695	576	2e-11	70.8
Dicer-1-PA	GSSPFG00034309001.2-RA	90.32	31	3	0	617	709	638	730	6e-11	68.8
Dicer-1-PA	GSSPFG00034309001.2-RA	47.62	21	11	0	6276	6338	2296	2358	6e-11	27.7
Dicer-1-PA	GSSPFG00034309001.2-RA	78.38	37	8	0	740	630	662	552	3e-10	66.8
Dicer-1-PA	GSSPFG00034309001.2-RA	54.35	46	21	0	637	774	526	663	1e-09	64.8
Dicer-1-PA	GSSPFG00034309001.2-RA	83.33	30	5	0	717	628	738	649	2e-09	64.3
Dicer-1-PA	GSSPFG00034309001.2-RA	86.21	29	4	0	707	621	728	642	6e-09	62.4
Dicer-1-PA	GSSPFG00034309001.2-RA	85.19	27	4	0	628	708	649	729	9e-09	61.9
Dicer-1-PA	GSSPFG00034309001.2-RA	63.41	41	15	0	761	639	650	528	9e-09	61.9
Dicer-1-PA	GSSPFG00034309001.2-RA	72.22	36	10	0	635	742	524	631	5e-08	59.4
Dicer-1-PA	GSSPFG00034309001.2-RA	68.18	22	7	0	618	683	672	737	9e-05	48.5
Dicer-1-PA	GSSPFG00034309001.2-RA	51.72	29	14	0	663	749	519	605	0.0007	45.5
Dicer-1-PA	GSSPFG00034309001.2-RA	85	20	3	0	617	676	671	730	0.008	42.1
Dicer-1-PA	GSSPFG00034309001.2-RA	62.96	27	10	0	750	670	606	526	0.008	42.1
Dicer-1-PA	GSSPFG00034309001.2-RA	55.56	27	12	0	670	750	526	606	0.044	39.6
Dicer-1-PA	GSSPFG00034309001.2-RA	44.74	38	21	0	634	747	595	708	0.062	39.1
Dicer-1-PA	GSSPFG00031307001.2-RA	100	284	0	0	5677	6528	1177	2028	0	792
Dicer-1-PA	GSSPFG00031307001.2-RA	98.57	280	4	0	4420	5259	1	840	0	776
Dicer-1-PA	GSSPFG00031307001.2-RA	96.64	149	5	0	6122	5676	1622	1176	0	361
Dicer-1-PA	GSSPFG00031307001.2-RA	89.23	130	14	0	4809	4420	390	1	0	318
Dicer-1-PA	GSSPFG00031307001.2-RA	89.47	133	14	0	4566	4964	147	545	0	317
Dicer-1-PA	GSSPFG00031307001.2-RA	96.12	103	4	0	5258	4950	839	531	0	267
Dicer-1-PA	GSSPFG00031307001.2-RA	93.27	104	7	0	5259	4948	840	529	0	266
Dicer-1-PA	GSSPFG00031307001.2-RA	95.7	93	4	0	5398	5676	841	1119	0	262
Dicer-1-PA	GSSPFG00031307001.2-RA	99.14	116	1	0	6527	6180	2027	1680	0	260
Dicer-1-PA	GSSPFG00031307001.2-RA	90.91	99	9	0	5850	6146	1350	1646	0	260
Dicer-1-PA	GSSPFG00031307001.2-RA	86.49	111	15	0	6195	6527	1695	2027	0	257
Dicer-1-PA	GSSPFG00031307001.2-RA	89.81	108	11	0	4946	5269	527	850	0	251
Dicer-1-PA	GSSPFG00031307001.2-RA	94.62	93	5	0	5675	5397	1118	840	0	247
Dicer-1-PA	GSSPFG00031307001.2-RA	88.75	80	9	0	5400	5639	843	1082	0	198
Dicer-1-PA	GSSPFG00031307001.2-RA	84.52	84	13	0	5646	5395	1089	838	0	193
Dicer-1-PA	GSSPFG00031307001.2-RA	86.36	66	9	0	6526	6329	2026	1829	0	157
Dicer-1-PA	GSSPFG00031307001.2-RA	86.21	58	8	0	4594	4421	175	2	0	142
Dicer-1-PA	GSSPFG00031307001.2-RA	93.88	49	3	0	5826	5680	1326	1180	0	127
Dicer-1-PA	GSSPFG00031307001.2-RA	86.36	66	9	0	6306	6109	1806	1609	0	123
Dicer-1-PA	GSSPFG00031307001.2-RA	89.58	48	5	0	4792	4649	373	230	0	113
Dicer-1-PA	GSSPFG00031307001.2-RA	90.24	41	4	0	5678	5800	1178	1300	0	105
Dicer-1-PA	GSSPFG00031307001.2-RA	88.1	42	5	0	4957	4832	538	413	0	89.1
Dicer-1-PA	GSSPFG00031307001.2-RA	82.86	35	6	0	4422	4526	3	107	0	74.7
Dicer-1-PA	GSSPFG00031307001.2-RA	88.89	27	3	0	6069	5989	1569	1489	0	69.8
Dicer-1-PA	GSSPFG00031307001.2-RA	92.86	28	2	0	4889	4806	470	387	0	65.3
Dicer-1-PA	GSSPFG00031307001.2-RA	92.31	13	1	0	5920	5882	1420	1382	0	30.2
Dicer-1-PA	GSSPFG00031307001.2-RA	91.25	80	7	0	5022	5261	603	842	0	201
Dicer-1-PA	GSSPFG00031307001.2-RA	85.87	92	13	0	5399	5674	842	1117	0	179
Dicer-1-PA	GSSPFG00031307001.2-RA	87.65	81	10	0	4649	4891	230	472	0	173
Dicer-1-PA	GSSPFG00031307001.2-RA	83.33	60	10	0	6107	6286	1607	1786	0	143
Dicer-1-PA	GSSPFG00031307001.2-RA	85.96	57	8	0	6356	6526	1856	2026	0	136
Dicer-1-PA	GSSPFG00031307001.2-RA	83.87	31	5	0	5676	5768	1176	1268	0	69.8
Dicer-1-PA	GSSPFG00031307001.2-RA	96	25	1	0	4529	4603	110	184	0	64.8
Dicer-1-PA	GSSPFG00031307001.2-RA	78.95	19	4	0	4421	4477	2	58	0	38.6
Dicer-1-PA	GSSPFG00031307001.2-RA	81.25	16	3	0	6023	6070	1523	1570	0	34.2
Dicer-1-PA	GSSPFG00031307001.2-RA	90.48	84	8	0	5260	5009	841	590	0	214
Dicer-1-PA	GSSPFG00031307001.2-RA	100	63	0	0	4742	4554	323	135	0	181
Dicer-1-PA	GSSPFG00031307001.2-RA	86.21	58	8	0	6528	6355	2028	1855	0	138
Dicer-1-PA	GSSPFG00031307001.2-RA	85.11	47	7	0	5674	5534	1117	977	0	107
Dicer-1-PA	GSSPFG00031307001.2-RA	80	55	11	0	6280	6116	1780	1616	0	91.1
Dicer-1-PA	GSSPFG00031307001.2-RA	90.32	31	3	0	5491	5399	934	842	0	77.2
Dicer-1-PA	GSSPFG00031307001.2-RA	93.1	29	2	0	4508	4422	89	3	0	72.3
Dicer-1-PA	GSSPFG00031307001.2-RA	89.66	29	3	0	5767	5681	1267	1181	0	69.3
Dicer-1-PA	GSSPFG00031307001.2-RA	86.96	23	3	0	6058	5990	1558	1490	0	58.9
Dicer-1-PA	GSSPFG00031307001.2-RA	93.75	16	1	0	4896	4849	477	430	0	41.1
Dicer-1-PA	GSSPFG00010058001.2-RA	94.7	264	14	0	850	1641	646	1437	0	585
Dicer-1-PA	GSSPFG00010058001.2-RA	98.83	171	2	0	2251	2763	2980	3492	0	488
Dicer-1-PA	GSSPFG00010058001.2-RA	97.67	172	4	0	2761	3276	3592	4107	0	480
Dicer-1-PA	GSSPFG00010058001.2-RA	94.8	173	9	0	3278	2760	4109	3591	0	454
Dicer-1-PA	GSSPFG00010058001.2-RA	94.19	172	10	0	2765	2250	3494	2979	0	434
Dicer-1-PA	GSSPFG00010058001.2-RA	94.8	173	9	0	2126	1608	2285	1767	0	419
Dicer-1-PA	GSSPFG00010058001.2-RA	90.8	174	16	0	2760	2239	3489	2968	0	399
Dicer-1-PA	GSSPFG00010058001.2-RA	96.13	155	6	0	1526	1062	1322	858	0	399
Dicer-1-PA	GSSPFG00010058001.2-RA	90.8	174	16	0	2240	2761	2969	3490	0	394
Dicer-1-PA	GSSPFG00010058001.2-RA	90.23	174	17	0	2761	2240	3490	2969	0	389
Dicer-1-PA	GSSPFG00010058001.2-RA	99.19	123	1	0	1609	1977	1768	2136	0	354
Dicer-1-PA	GSSPFG00010058001.2-RA	89.44	142	15	0	3180	2755	4011	3586	0	349
Dicer-1-PA	GSSPFG00010058001.2-RA	87.88	132	16	0	2756	3151	3587	3982	0	316
Dicer-1-PA	GSSPFG00010058001.2-RA	87.05	139	18	0	1188	1604	984	1400	0	310
Dicer-1-PA	GSSPFG00010058001.2-RA	86.89	122	16	0	1608	1973	1767	2132	0	309
Dicer-1-PA	GSSPFG00010058001.2-RA	86.33	139	19	0	1603	1187	1399	983	0	293
Dicer-1-PA	GSSPFG00010058001.2-RA	83.87	124	20	0	1963	1592	2122	1751	0	281
Dicer-1-PA	GSSPFG00010058001.2-RA	81.48	108	20	0	1174	851	970	647	0	248
Dicer-1-PA	GSSPFG00010058001.2-RA	89.69	97	10	0	2241	2531	2970	3260	0	246
Dicer-1-PA	GSSPFG00010058001.2-RA	97.14	105	3	0	16	330	1	315	0	244
Dicer-1-PA	GSSPFG00010058001.2-RA	90.24	123	12	0	1977	1609	2136	1768	0	226
Dicer-1-PA	GSSPFG00010058001.2-RA	89.32	103	11	0	324	16	309	1	0	224
Dicer-1-PA	GSSPFG00010058001.2-RA	90.38	104	10	0	1298	1609	1094	1405	0	205
Dicer-1-PA	GSSPFG00010058001.2-RA	89.87	79	8	0	1533	1297	1329	1093	0	195
Dicer-1-PA	GSSPFG00010058001.2-RA	86.25	80	11	0	322	83	307	68	0	191
Dicer-1-PA	GSSPFG00010058001.2-RA	80.65	93	18	0	852	1130	648	926	0	191
Dicer-1-PA	GSSPFG00010058001.2-RA	96.55	87	3	0	278	18	263	3	0	184
Dicer-1-PA	GSSPFG00010058001.2-RA	89.02	82	9	0	18	263	3	248	0	169
Dicer-1-PA	GSSPFG00010058001.2-RA	87.84	74	9	0	3202	2981	4033	3812	0	166
Dicer-1-PA	GSSPFG00010058001.2-RA	100	56	0	0	2032	2199	2191	2358	0	164
Dicer-1-PA	GSSPFG00010058001.2-RA	90.91	55	5	0	2763	2927	3594	3758	0	143
Dicer-1-PA	GSSPFG00010058001.2-RA	80.3	66	13	0	1269	1072	1065	868	0	139
Dicer-1-PA	GSSPFG00010058001.2-RA	80	65	13	0	1073	1267	869	1063	0	136
Dicer-1-PA	GSSPFG00010058001.2-RA	86.11	72	10	0	110	325	95	310	0	132
Dicer-1-PA	GSSPFG00010058001.2-RA	81.03	58	11	0	2209	2036	2368	2195	0	130
Dicer-1-PA	GSSPFG00010058001.2-RA	90.38	52	5	0	2917	2762	3748	3593	0	124
Dicer-1-PA	GSSPFG00010058001.2-RA	87.76	49	6	0	630	776	498	644	0	123
Dicer-1-PA	GSSPFG00010058001.2-RA	91.67	48	4	0	634	777	502	645	0	118
Dicer-1-PA	GSSPFG00010058001.2-RA	78.43	51	11	0	2046	2198	2205	2357	0	117
Dicer-1-PA	GSSPFG00010058001.2-RA	84.78	46	7	0	851	988	647	784	0	114
Dicer-1-PA	GSSPFG00010058001.2-RA	89.58	48	5	0	776	633	644	501	0	113
Dicer-1-PA	GSSPFG00010058001.2-RA	87.5	48	6	0	777	634	645	502	0	110
Dicer-1-PA	GSSPFG00010058001.2-RA	93.02	43	3	0	2988	3116	3819	3947	0	107
Dicer-1-PA	GSSPFG00010058001.2-RA	80	55	11	0	2199	2035	2358	2194	0	103
Dicer-1-PA	GSSPFG00010058001.2-RA	84.62	39	6	0	1041	925	837	721	0	93.5
Dicer-1-PA	GSSPFG00010058001.2-RA	94.12	34	2	0	1019	918	815	714	0	92.1
Dicer-1-PA	GSSPFG00010058001.2-RA	90	40	4	0	635	754	503	622	0	88.6
Dicer-1-PA	GSSPFG00010058001.2-RA	88.89	36	4	0	453	560	312	419	0	88.1
Dicer-1-PA	GSSPFG00010058001.2-RA	93.94	33	2	0	2664	2762	3393	3491	0	85.6
Dicer-1-PA	GSSPFG00010058001.2-RA	76.92	39	9	0	2084	2200	2243	2359	0	77.7
Dicer-1-PA	GSSPFG00010058001.2-RA	92.86	28	2	0	445	528	304	387	0	74.2
Dicer-1-PA	GSSPFG00010058001.2-RA	95.83	24	1	0	3156	3227	3987	4058	0	72.8
Dicer-1-PA	GSSPFG00010058001.2-RA	89.66	29	3	0	716	630	512	426	0	65.3
Dicer-1-PA	GSSPFG00010058001.2-RA	85.71	28	4	0	528	445	387	304	0	59.9
Dicer-1-PA	GSSPFG00010058001.2-RA	87.5	24	3	0	452	523	311	382	0	58.9
Dicer-1-PA	GSSPFG00010058001.2-RA	95.45	22	1	0	1817	1882	1976	2041	0	57.9
Dicer-1-PA	GSSPFG00010058001.2-RA	85.71	28	4	0	515	432	374	291	0	56.9
Dicer-1-PA	GSSPFG00010058001.2-RA	86.96	23	3	0	520	452	379	311	0	47.5
Dicer-1-PA	GSSPFG00010058001.2-RA	88.89	18	2	0	2571	2624	3300	3353	0	47
Dicer-1-PA	GSSPFG00010058001.2-RA	88.24	17	2	0	1928	1978	2087	2137	0	39.1
Dicer-1-PA	GSSPFG00010058001.2-RA	83.33	12	2	0	3270	3235	4101	4066	0	27.7
Dicer-1-PA	GSSPFG00010058001.2-RA	100	7	0	0	1155	1175	951	971	0	26.7
Dicer-1-PA	GSSPFG00010058001.2-RA	100	9	0	0	2198	2172	2357	2331	0	25.8
Dicer-1-PA	GSSPFG00010058001.2-RA	78.79	33	7	0	618	716	519	617	2e-29	82.7
Dicer-1-PA	GSSPFG00010058001.2-RA	78.79	33	7	0	1610	1708	1769	1867	2e-29	72.8
Dicer-1-PA	GSSPFG00010058001.2-RA	47.62	21	11	0	6276	6338	2116	2178	2e-29	27.7
Dicer-1-PA	GSSPFG00010058001.2-RA	80	25	5	0	668	742	503	577	5e-14	51
Dicer-1-PA	GSSPFG00010058001.2-RA	86.36	22	3	0	617	682	446	511	5e-14	47
Dicer-1-PA	GSSPFG00010058001.2-RA	89.29	28	3	0	631	714	427	510	7e-14	70.8
Dicer-1-PA	GSSPFG00010058001.2-RA	64.71	17	6	0	701	751	503	553	7e-14	26.7
Dicer-1-PA	GSSPFG00010058001.2-RA	68.29	41	13	0	630	752	426	548	1e-13	78.2
Dicer-1-PA	GSSPFG00010058001.2-RA	71.43	28	8	0	750	667	585	502	3e-13	46
Dicer-1-PA	GSSPFG00010058001.2-RA	88.89	18	2	0	678	625	507	454	3e-13	43.1
Dicer-1-PA	GSSPFG00010058001.2-RA	87.5	8	1	0	873	850	669	646	3e-13	23.3
Dicer-1-PA	GSSPFG00010058001.2-RA	58.54	41	17	0	630	752	393	515	7e-12	72.3
Dicer-1-PA	GSSPFG00010058001.2-RA	89.29	28	3	0	711	628	507	424	4e-11	65.3
Dicer-1-PA	GSSPFG00010058001.2-RA	58.82	17	7	0	750	700	552	502	4e-11	22.8
Dicer-1-PA	GSSPFG00010058001.2-RA	57.5	40	17	0	630	749	465	584	2e-10	67.3
Dicer-1-PA	GSSPFG00010058001.2-RA	92.86	28	2	0	632	715	428	511	6e-10	65.8
Dicer-1-PA	GSSPFG00010058001.2-RA	54.35	46	21	0	637	774	400	537	8e-10	65.3
Dicer-1-PA	GSSPFG00010058001.2-RA	51.11	45	22	0	618	752	447	581	8e-10	65.3
Dicer-1-PA	GSSPFG00010058001.2-RA	64.1	39	14	0	744	628	507	391	1e-09	63.9
Dicer-1-PA	GSSPFG00010058001.2-RA	47.37	19	10	0	1108	1052	4033	3977	1e-09	27.2
Dicer-1-PA	GSSPFG00010058001.2-RA	83.87	31	5	0	617	709	518	610	3e-09	63.4
Dicer-1-PA	GSSPFG00010058001.2-RA	82.76	29	5	0	707	621	608	522	9e-09	61.9
Dicer-1-PA	GSSPFG00010058001.2-RA	72.22	36	10	0	635	742	398	505	3e-08	59.9
Dicer-1-PA	GSSPFG00010058001.2-RA	66.67	36	12	0	634	741	469	576	3e-08	59.9
Dicer-1-PA	GSSPFG00010058001.2-RA	82.14	28	5	0	711	628	612	529	5e-08	59.4
Dicer-1-PA	GSSPFG00010058001.2-RA	63.41	41	15	0	761	639	524	402	7e-08	58.9
Dicer-1-PA	GSSPFG00010058001.2-RA	81.48	27	5	0	628	708	529	609	2e-07	57.4
Dicer-1-PA	GSSPFG00010058001.2-RA	66.67	36	12	0	740	633	575	468	1e-06	54.9
Dicer-1-PA	GSSPFG00010058001.2-RA	68.18	22	7	0	618	683	552	617	9e-05	48.5
Dicer-1-PA	GSSPFG00010058001.2-RA	65.62	32	11	0	716	621	545	450	0.0001	48
Dicer-1-PA	GSSPFG00010058001.2-RA	48.28	29	15	0	663	749	393	479	0.0007	45.5
Dicer-1-PA	GSSPFG00010058001.2-RA	48.48	33	17	0	618	716	480	578	0.001	45.1
Dicer-1-PA	GSSPFG00010058001.2-RA	62.07	29	11	0	628	714	457	543	0.002	44.1
Dicer-1-PA	GSSPFG00010058001.2-RA	40	40	24	0	630	749	432	551	0.003	43.6
Dicer-1-PA	GSSPFG00010058001.2-RA	85	20	3	0	617	676	551	610	0.008	42.1
Dicer-1-PA	GSSPFG00010058001.2-RA	35.85	53	34	0	670	828	400	558	0.011	41.6
Dicer-1-PA	GSSPFG00010058001.2-RA	47.22	36	19	0	634	741	436	543	0.022	40.6
Dicer-1-PA	GSSPFG00010058001.2-RA	59.26	27	11	0	750	670	480	400	0.088	38.6
Dicer-1-PA	GSSPFG00034307001-RA	100	285	0	0	5674	6528	394	1248	0	795
Dicer-1-PA	GSSPFG00034307001-RA	96.77	93	3	0	5398	5676	31	309	0	265
Dicer-1-PA	GSSPFG00034307001-RA	98.66	149	2	0	6122	5676	842	396	0	378
Dicer-1-PA	GSSPFG00034307001-RA	96.55	116	4	0	6527	6180	1247	900	0	251
Dicer-1-PA	GSSPFG00034307001-RA	92.47	93	7	0	5675	5397	308	30	0	241
Dicer-1-PA	GSSPFG00034307001-RA	88.89	9	1	0	6142	6116	862	836	0	25.3
Dicer-1-PA	GSSPFG00034307001-RA	92.93	99	7	0	5850	6146	570	866	0	270
Dicer-1-PA	GSSPFG00034307001-RA	83.78	111	18	0	6195	6527	915	1247	0	248
Dicer-1-PA	GSSPFG00034307001-RA	83.7	92	15	0	5399	5674	32	307	0	177
Dicer-1-PA	GSSPFG00034307001-RA	92.86	42	3	0	5675	5800	395	520	0	114
Dicer-1-PA	GSSPFG00034307001-RA	83.13	83	14	0	5646	5398	279	31	3e-171	185
Dicer-1-PA	GSSPFG00034307001-RA	81.54	65	12	0	6526	6332	1246	1052	3e-171	146
Dicer-1-PA	GSSPFG00034307001-RA	96	50	2	0	5826	5677	546	397	3e-171	136
Dicer-1-PA	GSSPFG00034307001-RA	89.39	66	7	0	6306	6109	1026	829	3e-171	127
Dicer-1-PA	GSSPFG00034307001-RA	96.3	27	1	0	6069	5989	789	709	3e-171	77.2
Dicer-1-PA	GSSPFG00034307001-RA	84.62	13	2	0	5920	5882	640	602	3e-171	27.7
Dicer-1-PA	GSSPFG00034307001-RA	81.25	80	15	0	5400	5639	33	272	8e-132	180
Dicer-1-PA	GSSPFG00034307001-RA	88.33	60	7	0	6107	6286	827	1006	8e-132	159
Dicer-1-PA	GSSPFG00034307001-RA	81.82	55	10	0	6362	6526	1082	1246	8e-132	116
Dicer-1-PA	GSSPFG00034307001-RA	87.1	31	4	0	5676	5768	396	488	8e-132	70.3
Dicer-1-PA	GSSPFG00034307001-RA	93.75	16	1	0	6023	6070	743	790	8e-132	43.1
Dicer-1-PA	GSSPFG00034307001-RA	81.03	58	11	0	6528	6355	1248	1075	3e-111	131
Dicer-1-PA	GSSPFG00034307001-RA	78.72	47	10	0	5674	5534	307	167	3e-111	98
Dicer-1-PA	GSSPFG00034307001-RA	85.29	34	5	0	6280	6179	1000	899	3e-111	83.6
Dicer-1-PA	GSSPFG00034307001-RA	84.85	33	5	0	5767	5669	487	389	3e-111	73.3
Dicer-1-PA	GSSPFG00034307001-RA	76.47	34	8	0	5491	5390	124	23	3e-111	68.8
Dicer-1-PA	GSSPFG00034307001-RA	95.65	23	1	0	6058	5990	778	710	3e-111	66.8
Dicer-1-PA	GSSPFG00030950001.2-RA	57.3	89	38	0	5776	6042	245	511	1e-53	139
Dicer-1-PA	GSSPFG00030950001.2-RA	43.66	71	40	0	6133	6345	608	820	1e-53	72.8
Dicer-1-PA	GSSPFG00030950001.2-RA	56.25	32	14	0	5497	5592	32	127	1e-53	49
Dicer-1-PA	GSSPFG00030950001.2-RA	53.85	52	24	0	6008	5853	477	322	6e-11	57.9
Dicer-1-PA	GSSPFG00030950001.2-RA	50	28	14	0	5582	5499	117	34	6e-11	36.1
Dicer-1-PA	GSSPFG00009303001.2-RA	48.75	80	41	0	5098	5337	364	603	5e-19	96
Dicer-1-PA	GSSPFG00009303001.2-RA	50	42	21	0	5231	5106	497	372	0.011	41.6
Dicer-1-PA	GSSPFG00035436001.2-RA	43.18	44	25	0	2413	2544	142	273	1e-14	52
Dicer-1-PA	GSSPFG00035436001.2-RA	53.33	30	14	0	2275	2364	22	111	1e-14	48.5
Dicer-1-PA	GSSPFG00017573001.2-RA	34.29	35	23	0	3346	3450	655	759	2e-13	35.2
Dicer-1-PA	GSSPFG00017573001.2-RA	76.92	13	3	0	3295	3333	610	648	2e-13	33.7
Dicer-1-PA	GSSPFG00017573001.2-RA	50	22	11	0	3502	3567	778	843	2e-13	33.2
Dicer-1-PA	GSSPFG00017573001.2-RA	24.14	29	22	0	3649	3735	931	1017	2e-13	27.7
Dicer-1-PA	GSSPFG00017573001.2-RB	34.29	35	23	0	3346	3450	655	759	4e-13	35.2
Dicer-1-PA	GSSPFG00017573001.2-RB	76.92	13	3	0	3295	3333	610	648	4e-13	33.7
Dicer-1-PA	GSSPFG00017573001.2-RB	50	22	11	0	3502	3567	778	843	4e-13	33.2
Dicer-1-PA	GSSPFG00017573001.2-RB	25.93	27	20	0	3649	3729	931	1011	4e-13	26.2
Dicer-1-PA	GSSPFG00024409001.2-RA	54.76	42	19	0	1852	1977	538	663	2e-09	64.3
Dicer-1-PA	GSSPFG00024170001-RA	45.65	46	25	0	1840	1977	1596	1733	2e-06	54.5
Dicer-1-PA	GSSPFG00007432001-RA	50	20	10	0	2372	2431	2227	2168	7e-05	30.2
Dicer-1-PA	GSSPFG00007432001-RA	45.45	22	12	0	5195	5260	1105	1040	7e-05	28.7
Dicer-1-PA	GSSPFG00007432001-RA	60	15	6	0	1806	1850	2545	2501	7e-05	27.7
Dicer-1-PA	GSSPFG00007432001-RA	47.83	23	12	0	5907	5975	265	197	7e-05	27.2
Dicer-1-PA	GSSPFG00007432001-RA	42.86	28	16	0	1035	1118	3028	2945	7e-05	26.7
Dicer-1-PA	GSSPFG00007432001-RA	46.43	28	15	0	5588	5505	2216	2299	0.082	32.2
Dicer-1-PA	GSSPFG00007432001-RA	44	25	14	0	1864	1790	2487	2561	0.082	28.7
Dicer-1-PA	GSSPFG00007432001-RA	48	25	13	0	1117	1043	2946	3020	0.082	25.8
Dicer-1-PA	GSSPFG00026231001-RA	53.12	32	15	0	5895	5990	321	416	0.001	40.1
Dicer-1-PA	GSSPFG00026231001-RA	64.29	14	5	0	2498	2539	212	253	0.001	26.2
Dicer-1-PA	GSSPFG00026231001-RA	43.48	23	13	0	1845	1913	75	143	0.001	24.3
Dicer-1-PA	GSSPFG00020883001-RA	53.12	32	15	0	5895	5990	321	416	0.001	40.1
Dicer-1-PA	GSSPFG00020883001-RA	64.29	14	5	0	2498	2539	212	253	0.001	26.2
Dicer-1-PA	GSSPFG00020883001-RA	43.48	23	13	0	1845	1913	75	143	0.001	24.3
Dicer-1-PA	GSSPFG00008810001.2-RA	60.87	23	9	0	5928	5996	1902	1834	0.001	44.6
Dicer-1-PA	GSSPFG00006955001.1-RA	39.39	33	20	0	618	716	1735	1833	0.004	36.6
Dicer-1-PA	GSSPFG00006955001.1-RA	54.17	24	11	0	5892	5963	3045	3116	0.004	32.2
Dicer-1-PA	GSSPFG00012503001-RA	37.5	48	30	0	1834	1977	124	267	0.004	43.1
Dicer-1-PA	GSSPFG00022161001.1-RA	45.45	22	12	0	3474	3539	4281	4216	0.005	34.7
Dicer-1-PA	GSSPFG00022161001.1-RA	43.75	32	18	0	5856	5951	3439	3344	0.005	32.2
Dicer-1-PA	GSSPFG00022161001.1-RA	47.37	19	10	0	1026	1082	4429	4373	0.005	25.3
Dicer-1-PA	GSSPFG00005077001-RA	50	26	13	0	3570	3647	151	74	0.006	34.2
Dicer-1-PA	GSSPFG00005077001-RA	41.38	29	17	0	1806	1892	224	138	0.006	27.7
Dicer-1-PA	GSSPFG00005077001-RA	52.63	19	9	0	1023	1079	488	432	0.006	23.8
Dicer-1-PA	GSSPFG00008365001.2-RA	41.18	34	20	0	5874	5975	778	677	0.01	33.2
Dicer-1-PA	GSSPFG00008365001.2-RA	33.33	45	30	0	1806	1940	4357	4223	0.01	29.2
Dicer-1-PA	GSSPFG00008365001.2-RA	55	20	9	0	3495	3554	2113	2054	0.01	28.7
Dicer-1-PA	GSSPFG00015887001.1-RA	60.71	28	11	0	2358	2441	1291	1208	0.011	41.6
Dicer-1-PA	GSSPFG00002331001-RA	61.11	18	7	0	5955	6008	10092	10145	0.013	33.7
Dicer-1-PA	GSSPFG00002331001-RA	50	20	10	0	1791	1850	6918	6977	0.013	27.7
Dicer-1-PA	GSSPFG00002331001-RA	57.14	14	6	0	5417	5458	8144	8185	0.013	27.2
Dicer-1-PA	GSSPFG00002331001-RA	52.94	17	8	0	5922	5972	9474	9524	0.013	27.2
Dicer-1-PA	GSSPFG00033864001-RA	53.85	26	12	0	5925	6002	2847	2924	0.013	35.6
Dicer-1-PA	GSSPFG00033864001-RA	44.44	18	10	0	875	928	200	253	0.013	28.7
Dicer-1-PA	GSSPFG00033864001-RA	41.18	17	10	0	3791	3841	2552	2602	0.013	25.3
Dicer-1-PA	GSSPFG00011148001-RA	52.63	19	9	0	5973	6029	249	305	0.013	33.7
Dicer-1-PA	GSSPFG00011148001-RA	48	25	13	0	5883	5957	183	257	0.013	25.3
Dicer-1-PA	GSSPFG00025497001-RA	43.48	46	26	0	2473	2336	210	73	0.016	41.1
Dicer-1-PA	GSSPFG00028508001-RA	36.59	41	26	0	1837	1959	898	1020	0.016	41.1
Dicer-1-PA	GSSPFG00030332001-RA	37.04	27	17	0	1845	1925	3985	3905	0.017	29.2
Dicer-1-PA	GSSPFG00030332001-RA	50	18	9	0	3582	3635	3667	3614	0.017	26.7
Dicer-1-PA	GSSPFG00030332001-RA	100	7	0	0	5550	5570	3301	3281	0.017	26.2
Dicer-1-PA	GSSPFG00030332001-RA	57.89	19	8	0	5928	5984	3094	3038	0.017	26.2
Dicer-1-PA	GSSPFG00030332001-RA	57.14	14	6	0	1806	1847	6529	6488	0.017	25.8
Dicer-1-PA	GSSPFG00009666001-RA	46.43	28	15	0	2882	2965	3728	3811	0.019	38.6
Dicer-1-PA	GSSPFG00009666001-RA	47.62	21	11	0	1020	1082	1074	1136	0.019	27.7
Dicer-1-PA	GSSPFG00021179001-RA	60	20	8	0	1872	1931	594	653	0.021	34.2
Dicer-1-PA	GSSPFG00021179001-RA	69.23	13	4	0	1779	1817	378	416	0.021	29.7
Dicer-1-PA	GSSPFG00018584001.2-RA	29.41	51	36	0	1825	1977	1603	1755	0.022	40.6
Dicer-1-PA	GSSPFG00002288001-RA	44	25	14	0	5955	6029	139	65	0.025	27.7
Dicer-1-PA	GSSPFG00002288001-RA	61.54	13	5	0	1779	1817	975	937	0.025	27.2
Dicer-1-PA	GSSPFG00002288001-RA	35.71	28	18	0	1806	1889	442	359	0.025	26.7
Dicer-1-PA	GSSPFG00002288001-RA	80	10	2	0	3500	3529	289	260	0.025	24.3
Dicer-1-PA	GSSPFG00001653001-RA	44	25	14	0	2930	3004	2955	3029	0.031	30.7
Dicer-1-PA	GSSPFG00001653001-RA	75	12	3	0	3014	3049	3017	3052	0.031	26.7
Dicer-1-PA	GSSPFG00030691001-RA	40.62	32	19	0	5931	6026	1063	968	0.034	35.2
Dicer-1-PA	GSSPFG00030691001-RA	38.1	21	13	0	3498	3560	2096	2034	0.034	27.7
Dicer-1-PA	GSSPFG00030691001-RA	47.06	17	9	0	2390	2440	2158	2108	0.034	24.8
Dicer-1-PA	GSSPFG00001086001.3-RA	36.36	33	21	0	5928	6026	532	630	0.034	30.2
Dicer-1-PA	GSSPFG00001086001.3-RA	45.83	24	13	0	636	707	208	279	0.034	29.2
Dicer-1-PA	GSSPFG00001086001.3-RA	50	18	9	0	3744	3797	260	313	0.034	27.2
Dicer-1-PA	GSSPFG00030870001-RA	34.04	47	31	0	5895	6035	2141	2281	0.034	37.6
Dicer-1-PA	GSSPFG00030870001-RA	58.82	17	7	0	2900	2950	1712	1762	0.034	27.2
Dicer-1-PA	GSSPFG00018053001-RA	56.25	16	7	0	2492	2539	548	595	0.036	31.2
Dicer-1-PA	GSSPFG00018053001-RA	38.46	39	24	0	5913	6029	1491	1607	0.036	29.7
Dicer-1-PA	GSSPFG00018053001-RA	34.21	38	25	0	1100	1213	233	346	0.036	27.7
Dicer-1-PA	GSSPFG00008166001-RA	44.44	27	15	0	6455	6375	514	594	0.036	35.6
Dicer-1-PA	GSSPFG00008166001-RA	50	18	9	0	2404	2351	840	893	0.036	28.2
Dicer-1-PA	GSSPFG00022078001.1-RA	44	25	14	0	2808	2882	5248	5174	0.041	29.2
Dicer-1-PA	GSSPFG00022078001.1-RA	50	22	11	0	2334	2399	5917	5852	0.041	28.7
Dicer-1-PA	GSSPFG00022078001.1-RA	42.86	21	12	0	6276	6338	2140	2078	0.041	27.2
Dicer-1-PA	GSSPFG00022078001.1-RA	55.56	18	8	0	3806	3859	2264	2211	0.041	25.8
Dicer-1-PA	GSSPFG00015015001-RA	42.86	35	20	0	5922	6026	6282	6386	0.042	32.2
Dicer-1-PA	GSSPFG00015015001-RA	50	18	9	0	1619	1672	5253	5306	0.042	29.2
Dicer-1-PA	GSSPFG00015015001-RA	41.67	24	14	0	3459	3530	6145	6216	0.042	27.7
Dicer-1-PA	GSSPFG00015540001-RA	51.61	31	15	0	2428	2336	648	740	0.044	39.6
Dicer-1-PA	GSSPFG00024481001-RA	42.55	47	27	0	5889	6029	27	167	0.044	39.6
Dicer-1-PA	GSSPFG00016619001-RA	42.55	47	27	0	5889	6029	27	167	0.044	39.6
Dicer-1-PA	GSSPFG00027098001-RA	34.04	47	31	0	1837	1977	373	513	0.044	39.6
Dicer-1-PA	GSSPFG00032020001.2-RA	50	22	11	0	2912	2977	997	932	0.044	32.2
Dicer-1-PA	GSSPFG00032020001.2-RA	40.91	22	13	0	2808	2873	1792	1727	0.044	25.3
Dicer-1-PA	GSSPFG00032020001.2-RA	40	30	18	0	5910	5999	727	638	0.044	25.3
Dicer-1-PA	GSSPFG00032020001.2-RA	55.56	18	8	0	3495	3548	934	881	0.044	24.3
Dicer-1-PA	GSSPFG00015010001-RA	42.86	28	16	0	630	713	1220	1303	0.045	32.7
Dicer-1-PA	GSSPFG00015010001-RA	87.5	8	1	0	696	719	1382	1405	0.045	24.3
Dicer-1-PA	GSSPFG00002433001-RA	42.86	28	16	0	2897	2814	3467	3384	0.045	36.6
Dicer-1-PA	GSSPFG00002433001-RA	34.15	41	27	0	3020	2898	4885	4763	0.045	28.7
Dicer-1-PA	GSSPFG00014729001-RA	48.28	29	15	0	2921	3007	2108	2022	0.047	35.6
Dicer-1-PA	GSSPFG00014729001-RA	50	18	9	0	2378	2431	2237	2184	0.047	29.2
Dicer-1-PA	GSSPFG00012996001-RA	46.67	30	16	0	5889	5978	2053	1964	0.051	38.1
Dicer-1-PA	GSSPFG00012996001-RA	55.56	18	8	0	2808	2861	2324	2271	0.051	26.7
Dicer-1-PA	GSSPFG00010323001-RA	34.78	46	30	0	2304	2441	2560	2423	0.054	32.2
Dicer-1-PA	GSSPFG00010323001-RA	56.25	16	7	0	3576	3623	2254	2207	0.054	30.2
Dicer-1-PA	GSSPFG00010323001-RA	100	7	0	0	5651	5671	1121	1101	0.054	24.8
Dicer-1-PA	GSSPFG00027475001-RA	60	15	6	0	4393	4349	394	350	0.065	31.7
Dicer-1-PA	GSSPFG00027475001-RA	40	20	12	0	4558	4499	453	394	0.065	24.8
Dicer-1-PA	GSSPFG00033709001-RA	52.17	23	11	0	2675	2607	1826	1894	0.075	38.6
Dicer-1-PA	GSSPFG00033709001-RA	70	10	3	0	1075	1046	2327	2356	0.075	25.8
Dicer-1-PA	GSSPFG00022963001-RA	40	30	18	0	2303	2392	431	520	0.077	29.7
Dicer-1-PA	GSSPFG00022963001-RA	50	20	10	0	3582	3641	1218	1277	0.077	27.7
Dicer-1-PA	GSSPFG00022963001-RA	54.55	11	5	0	896	928	368	400	0.077	26.7
Dicer-1-PA	GSSPFG00015967001.1-RA	48.15	27	14	0	2324	2404	7105	7025	0.088	38.6
Dicer-2-PA	GSSPFG00017573001.2-RA	100	339	0	0	2041	3057	1	1017	0	957
Dicer-2-PA	GSSPFG00017573001.2-RA	97.88	236	5	0	2043	2750	3	710	0	636
Dicer-2-PA	GSSPFG00017573001.2-RA	97.73	88	2	0	2793	3056	753	1016	0	236
Dicer-2-PA	GSSPFG00017573001.2-RA	98.27	231	4	0	2733	2041	693	1	0	621
Dicer-2-PA	GSSPFG00017573001.2-RA	97.73	88	2	0	3057	2794	1017	754	0	240
Dicer-2-PA	GSSPFG00017573001.2-RA	99.35	307	2	0	3056	2136	1016	96	0	810
Dicer-2-PA	GSSPFG00017573001.2-RA	100	15	0	0	2087	2043	47	3	0	44.6
Dicer-2-PA	GSSPFG00017573001.2-RA	97.47	198	5	0	2965	2372	925	332	0	517
Dicer-2-PA	GSSPFG00017573001.2-RA	96.97	99	3	0	2338	2042	298	2	0	268
Dicer-2-PA	GSSPFG00017573001.2-RA	100	13	0	0	3055	3017	1015	977	0	35.6
Dicer-2-PA	GSSPFG00017573001.2-RA	97.3	111	3	0	2042	2374	2	334	0	292
Dicer-2-PA	GSSPFG00017573001.2-RA	98.95	95	1	0	2435	2719	395	679	0	246
Dicer-2-PA	GSSPFG00017573001.2-RA	97.62	84	2	0	2804	3055	764	1015	0	217
Dicer-2-PA	GSSPFG00017573001.2-RB	100	337	0	0	2041	3051	1	1011	0	951
Dicer-2-PA	GSSPFG00017573001.2-RB	97.88	236	5	0	2043	2750	3	710	0	636
Dicer-2-PA	GSSPFG00017573001.2-RB	97.67	86	2	0	2793	3050	753	1010	0	230
Dicer-2-PA	GSSPFG00017573001.2-RB	98.27	231	4	0	2733	2041	693	1	0	621
Dicer-2-PA	GSSPFG00017573001.2-RB	97.67	86	2	0	3051	2794	1011	754	0	234
Dicer-2-PA	GSSPFG00017573001.2-RB	99.34	305	2	0	3050	2136	1010	96	0	803
Dicer-2-PA	GSSPFG00017573001.2-RB	100	15	0	0	2087	2043	47	3	0	44.6
Dicer-2-PA	GSSPFG00017573001.2-RB	97.47	198	5	0	2965	2372	925	332	0	517
Dicer-2-PA	GSSPFG00017573001.2-RB	96.97	99	3	0	2338	2042	298	2	0	268
Dicer-2-PA	GSSPFG00017573001.2-RB	100	12	0	0	3052	3017	1012	977	0	33.7
Dicer-2-PA	GSSPFG00017573001.2-RB	97.3	111	3	0	2042	2374	2	334	0	292
Dicer-2-PA	GSSPFG00017573001.2-RB	98.95	95	1	0	2435	2719	395	679	0	246
Dicer-2-PA	GSSPFG00017573001.2-RB	97.59	83	2	0	2804	3052	764	1012	0	213
Dicer-2-PA	GSSPFG00030950001.2-RA	99.38	325	2	0	4084	5058	32	1006	0	837
Dicer-2-PA	GSSPFG00030950001.2-RA	94.3	316	18	0	4110	5057	58	1005	0	836
Dicer-2-PA	GSSPFG00030950001.2-RA	93.83	324	20	0	5056	4085	1004	33	0	825
Dicer-2-PA	GSSPFG00030950001.2-RA	94.15	325	19	0	5058	4084	1006	32	0	770
Dicer-2-PA	GSSPFG00030950001.2-RA	95.24	168	8	0	4085	4588	33	536	0	409
Dicer-2-PA	GSSPFG00030950001.2-RA	93.1	145	10	0	4622	5056	570	1004	0	362
Dicer-2-PA	GSSPFG00030950001.2-RA	98.91	184	2	0	4637	4086	585	34	0	481
Dicer-2-PA	GSSPFG00030950001.2-RA	95.79	95	4	0	4991	4707	939	655	0	257
Dicer-2-PA	GSSPFG00030950001.2-RA	100	10	0	0	5057	5028	1005	976	0	24.8
Dicer-2-PA	GSSPFG00024409001.2-RA	94.66	262	14	0	849	1634	3	788	0	672
Dicer-2-PA	GSSPFG00024409001.2-RA	98.86	264	3	0	847	1638	1	792	0	664
Dicer-2-PA	GSSPFG00024409001.2-RA	97.48	238	6	0	1562	849	716	3	2e-179	619
Dicer-2-PA	GSSPFG00024409001.2-RA	100	10	0	0	1634	1605	788	759	2e-179	31.7
Dicer-2-PA	GSSPFG00024409001.2-RA	96.17	235	9	0	857	1561	11	715	6e-158	555
Dicer-2-PA	GSSPFG00024409001.2-RA	88.89	9	1	0	1613	1639	767	793	6e-158	23.3
Dicer-2-PA	GSSPFG00024409001.2-RA	96.41	167	6	0	1638	1138	792	292	2e-157	415
Dicer-2-PA	GSSPFG00024409001.2-RA	93.94	33	2	0	1089	991	243	145	2e-157	92.6
Dicer-2-PA	GSSPFG00024409001.2-RA	93.75	32	2	0	942	847	96	1	2e-157	88.6
Dicer-2-PA	GSSPFG00024409001.2-RA	94.48	163	9	0	1387	899	541	53	8e-150	401
Dicer-2-PA	GSSPFG00024409001.2-RA	93.65	63	4	0	1639	1451	793	605	8e-150	150
Dicer-2-PA	GSSPFG00009303001.2-RA	96.35	137	5	0	3499	3909	274	684	2e-168	366
Dicer-2-PA	GSSPFG00009303001.2-RA	93.55	93	6	0	3238	3516	16	294	2e-168	247
Dicer-2-PA	GSSPFG00009303001.2-RA	96.97	132	4	0	3896	3501	671	276	4e-154	343
Dicer-2-PA	GSSPFG00009303001.2-RA	93.18	88	6	0	3498	3235	276	13	4e-154	222
Dicer-2-PA	GSSPFG00009303001.2-RA	91.18	136	12	0	3903	3496	678	271	5e-148	325
Dicer-2-PA	GSSPFG00009303001.2-RA	97.7	87	2	0	3497	3237	275	15	5e-148	220
Dicer-2-PA	GSSPFG00009303001.2-RA	89.71	136	14	0	3501	3908	276	683	3e-145	324
Dicer-2-PA	GSSPFG00009303001.2-RA	91.95	87	7	0	3239	3499	17	277	3e-145	212
Dicer-2-PA	GSSPFG00009303001.2-RA	90.76	119	11	0	3497	3853	272	628	2e-125	261
Dicer-2-PA	GSSPFG00009303001.2-RA	91.86	86	7	0	3240	3497	18	275	2e-125	208
Dicer-2-PA	GSSPFG00009303001.2-RA	88.89	90	10	0	3496	3227	274	5	3e-116	213
Dicer-2-PA	GSSPFG00009303001.2-RA	89.74	78	8	0	3853	3620	628	395	3e-116	177
Dicer-2-PA	GSSPFG00009303001.2-RA	96.3	27	1	0	3580	3500	355	275	3e-116	67.8
Dicer-2-PA	GSSPFG00034309001.2-RA	57.3	89	38	0	4297	4563	6766	7032	7e-124	139
Dicer-2-PA	GSSPFG00034309001.2-RA	45.98	87	47	0	3589	3849	6088	6348	7e-124	99.5
Dicer-2-PA	GSSPFG00034309001.2-RA	52.94	51	24	0	1384	1536	2191	2343	7e-124	72.3
Dicer-2-PA	GSSPFG00034309001.2-RA	45.9	61	33	0	4690	4872	7153	7335	7e-124	68.8
Dicer-2-PA	GSSPFG00034309001.2-RA	50	40	20	0	4060	4179	6463	6582	7e-124	56.4
Dicer-2-PA	GSSPFG00034309001.2-RA	43.18	44	25	0	1879	2010	3343	3474	7e-124	52
Dicer-2-PA	GSSPFG00034309001.2-RA	30.19	53	37	0	2971	3129	4711	4869	7e-124	49
Dicer-2-PA	GSSPFG00034309001.2-RA	37.14	35	22	0	2695	2799	4444	4548	7e-124	37.6
Dicer-2-PA	GSSPFG00034309001.2-RA	50	22	11	0	1783	1848	3229	3294	7e-124	34.2
Dicer-2-PA	GSSPFG00034309001.2-RA	76.92	13	3	0	2650	2688	4393	4431	7e-124	33.7
Dicer-2-PA	GSSPFG00034309001.2-RA	50	22	11	0	2818	2883	4564	4629	7e-124	33.2
Dicer-2-PA	GSSPFG00034309001.2-RA	29.73	37	26	0	1168	1278	1975	2085	7e-124	30.2
Dicer-2-PA	GSSPFG00034309001.2-RA	48.57	70	36	0	4529	4320	6998	6789	4e-14	63.4
Dicer-2-PA	GSSPFG00034309001.2-RA	62.5	24	9	0	4151	4080	6554	6483	4e-14	39.1
Dicer-2-PA	GSSPFG00034309001.2-RA	38.3	47	29	0	1529	1389	2336	2196	4e-14	27.2
Dicer-2-PA	GSSPFG00034309001.2-RA	76.92	13	3	0	2687	2649	4430	4392	4e-14	24.8
Dicer-2-PA	GSSPFG00035298001.2-RA	99.28	138	1	0	241	654	1	414	4e-106	384
Dicer-2-PA	GSSPFG00035298001.2-RA	92.65	68	5	0	654	451	414	211	2e-89	175
Dicer-2-PA	GSSPFG00035298001.2-RA	96.72	61	2	0	424	242	184	2	2e-89	174
Dicer-2-PA	GSSPFG00035298001.2-RA	96.43	112	4	0	653	318	413	78	1e-74	271
Dicer-2-PA	GSSPFG00035298001.2-RA	100	10	0	0	272	243	32	3	1e-74	30.2
Dicer-2-PA	GSSPFG00035298001.2-RA	96.49	57	2	0	483	653	243	413	9e-73	160
Dicer-2-PA	GSSPFG00035298001.2-RA	96.55	58	2	0	242	415	2	175	9e-73	134
Dicer-2-PA	GSSPFG00035298001.2-RA	93.75	64	4	0	461	652	221	412	1e-68	146
Dicer-2-PA	GSSPFG00035298001.2-RA	94.87	39	2	0	318	434	78	194	1e-68	104
Dicer-2-PA	GSSPFG00035298001.2-RA	100	13	0	0	243	281	3	41	1e-68	48.5
Dicer-2-PA	GSSPFG00035298001.2-RA	96.23	53	2	0	399	241	159	1	1e-55	141
Dicer-2-PA	GSSPFG00035298001.2-RA	100	24	0	0	652	581	412	341	1e-55	71.8
Dicer-2-PA	GSSPFG00035298001.2-RA	100	15	0	0	526	482	286	242	1e-55	42.6
Dicer-2-PA	GSSPFG00035436001.2-RA	100	100	0	0	1741	2040	4	303	1e-73	277
Dicer-2-PA	GSSPFG00035436001.2-RA	98	100	2	0	1740	2039	3	302	6e-70	264
Dicer-2-PA	GSSPFG00035436001.2-RA	97.98	99	2	0	2037	1741	300	4	9e-69	260
Dicer-2-PA	GSSPFG00035436001.2-RA	99	100	1	0	2039	1740	302	3	1e-58	227
Dicer-2-PA	GSSPFG00035436001.2-RA	95.56	45	2	0	1739	1873	2	136	3e-52	116
Dicer-2-PA	GSSPFG00035436001.2-RA	97.44	39	1	0	1922	2038	185	301	3e-52	109
Dicer-2-PA	GSSPFG00035436001.2-RA	100	37	0	0	1879	1769	142	32	9e-29	89.6
Dicer-2-PA	GSSPFG00035436001.2-RA	95.65	23	1	0	1990	1922	253	185	9e-29	57.9
Dicer-2-PA	GSSPFG00031307001.2-RA	57.3	89	38	0	4297	4563	1276	1542	1e-69	139
Dicer-2-PA	GSSPFG00031307001.2-RA	52.83	53	25	0	3589	3747	679	837	1e-69	73.7
Dicer-2-PA	GSSPFG00031307001.2-RA	45.9	61	33	0	4690	4872	1663	1845	1e-69	68.8
Dicer-2-PA	GSSPFG00031307001.2-RA	50	40	20	0	4060	4179	916	1035	1e-69	56.4
Dicer-2-PA	GSSPFG00031307001.2-RA	53.49	43	20	0	4448	4320	1427	1299	1e-11	46
Dicer-2-PA	GSSPFG00031307001.2-RA	62.5	24	9	0	4151	4080	1007	936	1e-11	39.1
Dicer-2-PA	GSSPFG00031307001.2-RA	55.56	18	8	0	4529	4476	1508	1455	1e-11	27.2
Dicer-2-PA	GSSPFG00031307001.2-RA	47.37	19	10	0	1705	1649	169	113	1e-11	27.2
Dicer-2-PA	GSSPFG00035026001.2-RA	100	80	0	0	1	240	1	240	2e-58	226
Dicer-2-PA	GSSPFG00035026001.2-RA	93.75	80	5	0	240	1	240	1	5e-54	211
Dicer-2-PA	GSSPFG00035026001.2-RA	93.67	79	5	0	2	238	2	238	1e-50	200
Dicer-2-PA	GSSPFG00035026001.2-RA	91.14	79	7	0	3	239	3	239	1e-49	196
Dicer-2-PA	GSSPFG00035026001.2-RA	91.14	79	7	0	238	2	238	2	4e-45	182
Dicer-2-PA	GSSPFG00035026001.2-RA	96.15	52	2	0	239	84	239	84	2e-33	143
Dicer-2-PA	GSSPFG00034307001-RA	57.3	89	38	0	4297	4563	496	762	6e-55	139
Dicer-2-PA	GSSPFG00034307001-RA	45.9	61	33	0	4690	4872	883	1065	6e-55	68.8
Dicer-2-PA	GSSPFG00034307001-RA	50	40	20	0	4060	4179	106	225	6e-55	56.4
Dicer-2-PA	GSSPFG00034307001-RA	48.57	70	36	0	4529	4320	728	519	1e-13	63.4
Dicer-2-PA	GSSPFG00034307001-RA	62.5	24	9	0	4151	4080	197	126	1e-13	39.1
Dicer-2-PA	GSSPFG00010058001.2-RA	52.94	51	24	0	1384	1536	2011	2163	8e-29	72.3
Dicer-2-PA	GSSPFG00010058001.2-RA	43.18	44	25	0	1879	2010	3142	3273	8e-29	52
Dicer-2-PA	GSSPFG00010058001.2-RA	53.33	30	14	0	1759	1848	3004	3093	8e-29	48.5
Dicer-2-PA	GSSPFG00010058001.2-RA	29.73	37	26	0	1168	1278	1795	1905	8e-29	30.2
Dicer-2-PA	GSSPFG00035454001.2-RA	96.15	26	1	0	3059	3136	2	79	1e-14	81.2
Dicer-2-PA	GSSPFG00035454001.2-RA	96.3	27	1	0	3138	3058	81	1	8e-14	78.2
Dicer-2-PA	GSSPFG00035454001.2-RA	96.15	26	1	0	3136	3059	79	2	2e-13	76.7
Dicer-2-PA	GSSPFG00035454001.2-RA	100	26	0	0	3137	3060	80	3	6e-13	75.2
Dicer-2-PA	GSSPFG00035454001.2-RA	100	27	0	0	3058	3138	1	81	9e-13	74.7
Dicer-2-PA	GSSPFG00035454001.2-RA	96.15	26	1	0	3060	3137	3	80	4e-11	69.3
Dicer-2-PA	GSSPFG00024170001-RA	40	55	33	0	1363	1527	1587	1751	2e-06	54
Dicer-2-PA	GSSPFG00015940001.1-RA	39.58	48	29	0	1384	1527	1972	2115	5e-05	49
Dicer-2-PA	GSSPFG00011667001-RA	44.9	49	27	0	1381	1527	961	1107	5e-05	49
Dicer-2-PA	GSSPFG00033449001-RA	42.86	49	28	0	1381	1527	976	1122	0.0004	46
Dicer-2-PA	GSSPFG00030821001-RA	44.44	45	25	0	1381	1515	961	1095	0.0008	45.1
Dicer-2-PA	GSSPFG00007432001-RA	37.93	29	18	0	3861	3947	913	827	0.002	31.7
Dicer-2-PA	GSSPFG00007432001-RA	53.33	15	7	0	775	819	3883	3839	0.002	28.7
Dicer-2-PA	GSSPFG00007432001-RA	31.25	32	22	0	3454	3549	2718	2623	0.002	26.2
Dicer-2-PA	GSSPFG00007432001-RA	56.25	16	7	0	4722	4769	778	731	0.002	25.8
Dicer-2-PA	GSSPFG00014637001-RA	39.13	46	28	0	1390	1527	40	177	0.012	41.1
Dicer-2-PA	GSSPFG00014638001-RA	43.24	37	21	0	1417	1527	229	339	0.017	40.6
Dicer-2-PA	GSSPFG00009515001-RA	34	50	33	0	1381	1530	1048	1197	0.034	39.6
Dicer-2-PA	GSSPFG00028508001-RA	34	50	33	0	1378	1527	907	1056	0.068	38.6
Dicer-2-PA	GSSPFG00005002001-RA	43.24	37	21	0	46	156	94	204	0.095	38.1
Pasha-PA	GSSPFG00015164001.2-RA	88.41	345	40	0	876	1910	1035	2069	0	785
Pasha-PA	GSSPFG00015164001.2-RA	96.3	216	8	0	648	1	804	157	0	546
Pasha-PA	GSSPFG00015164001.2-RA	99.51	203	1	0	880	1488	1039	1647	0	528
Pasha-PA	GSSPFG00015164001.2-RA	97.89	190	4	0	313	882	469	1038	0	527
Pasha-PA	GSSPFG00015164001.2-RA	100	182	0	0	1537	2082	1696	2241	0	504
Pasha-PA	GSSPFG00015164001.2-RA	92.73	165	12	0	303	797	459	953	0	434
Pasha-PA	GSSPFG00015164001.2-RA	93.91	115	7	0	646	302	802	458	0	312
Pasha-PA	GSSPFG00015164001.2-RA	99.02	102	1	0	2	307	158	463	0	277
Pasha-PA	GSSPFG00015164001.2-RA	92.24	116	9	0	1222	875	1381	1034	0	275
Pasha-PA	GSSPFG00015164001.2-RA	89.9	99	10	0	1236	940	1395	1099	0	236
Pasha-PA	GSSPFG00015164001.2-RA	81.05	95	18	0	1560	1276	1719	1435	0	203
Pasha-PA	GSSPFG00015164001.2-RA	97.22	72	2	0	1	216	157	372	0	193
Pasha-PA	GSSPFG00015164001.2-RA	79.55	88	18	0	1534	1271	1693	1430	0	191
Pasha-PA	GSSPFG00015164001.2-RA	96.92	65	2	0	196	2	352	158	0	182
Pasha-PA	GSSPFG00015164001.2-RA	97.37	76	2	0	1949	1722	2108	1881	0	180
Pasha-PA	GSSPFG00015164001.2-RA	93.33	60	4	0	879	700	1035	856	0	153
Pasha-PA	GSSPFG00015164001.2-RA	100	47	0	0	1676	1536	1835	1695	0	133
Pasha-PA	GSSPFG00015164001.2-RA	81.48	54	10	0	2080	1919	2239	2078	0	116
Pasha-PA	GSSPFG00015164001.2-RA	90.91	44	4	0	1752	1621	1911	1780	0	105
Pasha-PA	GSSPFG00015164001.2-RA	96.97	33	1	0	779	877	935	1033	0	89.1
Pasha-PA	GSSPFG00015164001.2-RA	89.29	28	3	0	766	683	922	839	0	75.2
Pasha-PA	GSSPFG00015164001.2-RA	75.61	41	10	0	1959	2081	2118	2240	0	73.3
Pasha-PA	GSSPFG00015164001.2-RA	92.86	28	2	0	2081	1998	2240	2157	0	72.8
Pasha-PA	GSSPFG00015164001.2-RA	100	23	0	0	689	621	845	777	0	66.3
Pasha-PA	GSSPFG00015164001.2-RA	95	20	1	0	938	879	1097	1038	0	54.9
Pasha-PA	GSSPFG00015164001.2-RA	85.71	21	3	0	1863	1801	2022	1960	0	50
Pasha-PA	GSSPFG00015164001.2-RA	92.86	14	1	0	1789	1748	1948	1907	0	41.6
Pasha-PA	GSSPFG00015164001.2-RA	92.31	13	1	0	880	842	1036	998	0	34.7
Pasha-PA	GSSPFG00015164001.2-RA	100	11	0	0	225	257	381	413	0	23.8
Pasha-PA	GSSPFG00015164001.2-RA	85.63	174	25	0	992	1513	1151	1672	0	355
Pasha-PA	GSSPFG00015164001.2-RA	86.55	119	16	0	1724	2080	1883	2239	0	250
Pasha-PA	GSSPFG00015164001.2-RA	93.06	72	5	0	356	571	512	727	0	194
Pasha-PA	GSSPFG00015164001.2-RA	96.77	62	2	0	3	188	159	344	0	159
Pasha-PA	GSSPFG00015164001.2-RA	92.86	28	2	0	1619	1702	1778	1861	0	75.7
Pasha-PA	GSSPFG00015164001.2-RA	100	20	0	0	881	940	1040	1099	0	49.5
Pasha-PA	GSSPFG00015164001.2-RA	100	16	0	0	617	664	773	820	0	46
Pasha-PA	GSSPFG00015164001.2-RA	93.33	15	1	0	837	881	993	1037	0	39.1
Pasha-PA	GSSPFG00015164001.2-RA	85.71	14	2	0	701	742	857	898	0	30.2
Pasha-PA	GSSPFG00015164001.2-RA	94.51	164	9	0	1478	987	1637	1146	0	392
Pasha-PA	GSSPFG00015164001.2-RA	100	84	0	0	566	315	722	471	0	227
Pasha-PA	GSSPFG00015164001.2-RA	81.97	61	11	0	2082	1900	2241	2059	0	87.1
Pasha-PA	GSSPFG00015164001.2-RA	93.55	31	2	0	1711	1619	1870	1778	0	83.6
Pasha-PA	GSSPFG00015164001.2-RA	93.75	16	1	0	1867	1820	2026	1979	0	42.1
Pasha-PA	GSSPFG00015164001.2-RA	100	9	0	0	29	3	185	159	0	27.7
Pasha-PA	GSSPFG00015164001.2-RA	100	7	0	0	755	735	911	891	0	24.3
Pasha-PA	GSSPFG00030332001-RA	64.71	17	6	0	490	440	5729	5779	2e-05	38.1
Pasha-PA	GSSPFG00030332001-RA	52.63	19	9	0	1021	965	5537	5593	2e-05	28.2
Pasha-PA	GSSPFG00030332001-RA	43.75	16	9	0	1850	1803	3038	3085	2e-05	25.8
Pasha-PA	GSSPFG00030332001-RA	43.75	16	9	0	1409	1362	5132	5179	2e-05	25.3
Pasha-PA	GSSPFG00020200001.1-RA	40	40	24	0	1688	1807	2000	2119	0.005	41.1
Pasha-PA	GSSPFG00028181001-RA	55	20	9	0	428	487	1310	1369	0.005	39.1
Pasha-PA	GSSPFG00028181001-RA	53.85	13	6	0	266	304	746	784	0.005	24.8
Pasha-PA	GSSPFG00032659001-RA	55	20	9	0	1731	1790	447	506	0.039	33.2
Pasha-PA	GSSPFG00032659001-RA	44	25	14	0	1799	1873	1995	2069	0.039	28.2
Pasha-PA	GSSPFG00032381001-RA	73.33	15	4	0	446	490	104	148	0.054	37.6
Pasha-PA	GSSPFG00007028001-RA	50	20	10	0	1190	1249	3806	3865	0.07	27.7
Pasha-PA	GSSPFG00007028001-RA	60	15	6	0	1278	1322	3989	4033	0.07	26.7
Pasha-PA	GSSPFG00013078001-RA	47.37	19	10	0	413	469	290	346	0.083	31.7
Pasha-PA	GSSPFG00013078001-RA	80	10	2	0	1284	1313	377	406	0.083	27.2
Pasha-PB	GSSPFG00015164001.2-RA	88.41	345	40	0	384	1418	1035	2069	0	785
Pasha-PB	GSSPFG00015164001.2-RA	99.51	203	1	0	388	996	1039	1647	0	530
Pasha-PB	GSSPFG00015164001.2-RA	100	182	0	0	1045	1590	1696	2241	0	505
Pasha-PB	GSSPFG00015164001.2-RA	95.87	121	5	0	28	390	676	1038	0	330
Pasha-PB	GSSPFG00015164001.2-RA	92.24	116	9	0	730	383	1381	1034	0	275
Pasha-PB	GSSPFG00015164001.2-RA	92.47	93	7	0	27	305	675	953	0	238
Pasha-PB	GSSPFG00015164001.2-RA	81.05	95	18	0	1068	784	1719	1435	0	203
Pasha-PB	GSSPFG00015164001.2-RA	97.37	76	2	0	1457	1230	2108	1881	0	180
Pasha-PB	GSSPFG00015164001.2-RA	93.33	60	4	0	387	208	1035	856	0	153
Pasha-PB	GSSPFG00015164001.2-RA	100	47	0	0	1184	1044	1835	1695	0	133
Pasha-PB	GSSPFG00015164001.2-RA	95.35	43	2	0	154	26	802	674	0	118
Pasha-PB	GSSPFG00015164001.2-RA	96.97	33	1	0	287	385	935	1033	0	89.1
Pasha-PB	GSSPFG00015164001.2-RA	75.61	41	10	0	1467	1589	2118	2240	0	73.3
Pasha-PB	GSSPFG00015164001.2-RA	92.86	28	2	0	1589	1506	2240	2157	0	72.8
Pasha-PB	GSSPFG00015164001.2-RA	100	23	0	0	197	129	845	777	0	66.3
Pasha-PB	GSSPFG00015164001.2-RA	89.9	99	10	0	744	448	1395	1099	0	236
Pasha-PB	GSSPFG00015164001.2-RA	79.55	88	18	0	1042	779	1693	1430	0	191
Pasha-PB	GSSPFG00015164001.2-RA	81.48	54	10	0	1588	1427	2239	2078	0	116
Pasha-PB	GSSPFG00015164001.2-RA	90.91	44	4	0	1260	1129	1911	1780	0	105
Pasha-PB	GSSPFG00015164001.2-RA	95.24	42	2	0	156	31	804	679	0	95
Pasha-PB	GSSPFG00015164001.2-RA	89.29	28	3	0	274	191	922	839	0	75.2
Pasha-PB	GSSPFG00015164001.2-RA	95	20	1	0	446	387	1097	1038	0	54.9
Pasha-PB	GSSPFG00015164001.2-RA	85.71	21	3	0	1371	1309	2022	1960	0	50
Pasha-PB	GSSPFG00015164001.2-RA	92.86	14	1	0	1297	1256	1948	1907	0	41.6
Pasha-PB	GSSPFG00015164001.2-RA	92.31	13	1	0	388	350	1036	998	0	34.7
Pasha-PB	GSSPFG00015164001.2-RA	85.63	174	25	0	500	1021	1151	1672	0	355
Pasha-PB	GSSPFG00015164001.2-RA	86.55	119	16	0	1232	1588	1883	2239	0	250
Pasha-PB	GSSPFG00015164001.2-RA	92.86	28	2	0	1127	1210	1778	1861	0	75.7
Pasha-PB	GSSPFG00015164001.2-RA	100	20	0	0	389	448	1040	1099	0	49.5
Pasha-PB	GSSPFG00015164001.2-RA	100	16	0	0	125	172	773	820	0	46
Pasha-PB	GSSPFG00015164001.2-RA	93.75	16	1	0	32	79	680	727	0	43.1
Pasha-PB	GSSPFG00015164001.2-RA	93.33	15	1	0	345	389	993	1037	0	39.1
Pasha-PB	GSSPFG00015164001.2-RA	85.71	14	2	0	209	250	857	898	0	30.2
Pasha-PB	GSSPFG00015164001.2-RA	94.51	164	9	0	986	495	1637	1146	2e-157	392
Pasha-PB	GSSPFG00015164001.2-RA	81.97	61	11	0	1590	1408	2241	2059	2e-157	87.1
Pasha-PB	GSSPFG00015164001.2-RA	93.55	31	2	0	1219	1127	1870	1778	2e-157	83.6
Pasha-PB	GSSPFG00015164001.2-RA	93.75	16	1	0	1375	1328	2026	1979	2e-157	42.1
Pasha-PB	GSSPFG00015164001.2-RA	100	15	0	0	74	30	722	678	2e-157	39.1
Pasha-PB	GSSPFG00015164001.2-RA	100	7	0	0	263	243	911	891	2e-157	24.3
Pasha-PB	GSSPFG00020200001.1-RA	40	40	24	0	1196	1315	2000	2119	0.004	41.1
Pasha-PB	GSSPFG00032659001-RA	55	20	9	0	1239	1298	447	506	0.023	33.2
Pasha-PB	GSSPFG00032659001-RA	44	25	14	0	1307	1381	1995	2069	0.023	28.2
Pasha-PB	GSSPFG00007028001-RA	50	20	10	0	698	757	3806	3865	0.054	27.7
Pasha-PB	GSSPFG00007028001-RA	60	15	6	0	786	830	3989	4033	0.054	26.7
Pasha-PB	GSSPFG00015125001-RA	52.63	19	9	0	1239	1295	585	641	0.082	31.2
Pasha-PB	GSSPFG00015125001-RA	44	25	14	0	1307	1381	2133	2207	0.082	28.2
Pasha-PB	GSSPFG00009006001-RA	43.48	23	13	0	1358	1290	90	158	0.086	30.7
Pasha-PB	GSSPFG00009006001-RA	77.78	9	2	0	480	454	319	345	0.086	26.2
Loquacious-PBa	GSSPFG00010630001.2-RA	97.35	264	7	0	1153	362	946	155	0	711
Loquacious-PBa	GSSPFG00010630001.2-RA	98.04	51	1	0	349	197	154	2	0	147
Loquacious-PBa	GSSPFG00010630001.2-RA	99.25	267	2	0	355	1155	148	948	0	693
Loquacious-PBa	GSSPFG00010630001.2-RA	98	50	1	0	198	347	3	152	0	142
Loquacious-PBa	GSSPFG00010630001.2-RA	97.73	264	6	0	363	1154	156	947	0	688
Loquacious-PBa	GSSPFG00010630001.2-RA	100	51	0	0	196	348	1	153	0	138
Loquacious-PBa	GSSPFG00010630001.2-RA	99.25	133	1	0	761	363	554	156	0	366
Loquacious-PBa	GSSPFG00010630001.2-RA	100	119	0	0	1154	798	947	591	0	330
Loquacious-PBa	GSSPFG00010630001.2-RA	98.04	51	1	0	348	196	153	1	0	145
Loquacious-PBa	GSSPFG00010630001.2-RA	99.09	220	2	0	1155	496	948	289	0	588
Loquacious-PBa	GSSPFG00010630001.2-RA	100	41	0	0	320	198	125	3	0	110
Loquacious-PBa	GSSPFG00010630001.2-RA	91.67	24	2	0	432	361	225	154	0	58.9
Loquacious-PBa	GSSPFG00010630001.2-RA	96.63	178	6	0	365	898	158	691	0	439
Loquacious-PBa	GSSPFG00010630001.2-RA	97.87	47	1	0	197	337	2	142	0	134
Loquacious-PBa	GSSPFG00010630001.2-RA	100	37	0	0	1043	1153	836	946	0	108
Loquacious-PBa	GSSPFG00010630001.2-RA	95.65	23	1	0	944	1012	737	805	0	30.7
Loquacious-PBa	GSSPFG00027888001.2-RA	96.88	64	2	0	193	2	434	243	2e-48	191
Loquacious-PBa	GSSPFG00027888001.2-RA	96.88	64	2	0	3	194	244	435	1e-46	185
Loquacious-PBa	GSSPFG00027888001.2-RA	96.88	64	2	0	2	193	243	434	2e-46	184
Loquacious-PBa	GSSPFG00027888001.2-RA	96.92	65	2	0	195	1	436	242	5e-46	183
Loquacious-PBa	GSSPFG00027888001.2-RA	100	35	0	0	91	195	332	436	1e-23	108
Loquacious-PBa	GSSPFG00026292001-RA	37.5	40	25	0	616	735	1532	1651	2e-05	39.7
Loquacious-PBa	GSSPFG00026292001-RA	35.14	37	24	0	1033	1143	2405	2515	2e-05	31.4
Loquacious-PBa	GSSPFG00005564001-RA	55	20	9	0	720	779	977	1036	0.0007	28.2
Loquacious-PBa	GSSPFG00005564001-RA	69.23	13	4	0	222	260	761	799	0.0007	26.7
Loquacious-PBa	GSSPFG00005564001-RA	37.5	24	15	0	15	86	110	181	0.0007	25.3
Loquacious-PBa	GSSPFG00005564001-RA	53.33	15	7	0	103	147	675	719	0.0007	24
Loquacious-PBa	GSSPFG00026231001-RA	39.53	43	26	0	610	738	667	795	0.004	38.2
Loquacious-PBa	GSSPFG00026231001-RA	45.83	24	13	0	274	345	208	279	0.004	24
Loquacious-PBa	GSSPFG00020883001-RA	39.53	43	26	0	610	738	667	795	0.004	38.2
Loquacious-PBa	GSSPFG00020883001-RA	45.83	24	13	0	274	345	208	279	0.004	24
Loquacious-PBa	GSSPFG00002685001-RA	52	25	12	0	88	14	1560	1486	0.021	37.1
Loquacious-PBa	GSSPFG00002685001-RA	47.06	17	9	0	1099	1049	2144	2094	0.021	23.3
Loquacious-PBa	GSSPFG00019493001-RA	51.85	27	13	0	133	53	2064	1984	0.022	34.2
Loquacious-PBa	GSSPFG00019493001-RA	50	22	11	0	257	192	2480	2415	0.022	26.2
Loquacious-PBa	GSSPFG00010574001-RA	55	20	9	0	91	150	76	135	0.053	36.8
Loquacious-PBa	GSSPFG00023960001-RA	57.14	21	9	0	63	125	1220	1282	0.069	30.7
Loquacious-PBa	GSSPFG00023960001-RA	77.78	9	2	0	562	588	1352	1378	0.069	27.5
Loquacious-PBa	GSSPFG00028410001-RA	43.75	32	18	0	33	128	820	725	0.081	36.1
Loquacious-PBb	GSSPFG00010630001.2-RA	98.1	315	6	0	1141	197	946	2	0	861
Loquacious-PBb	GSSPFG00010630001.2-RA	98.41	315	5	0	198	1142	3	947	0	838
Loquacious-PBb	GSSPFG00010630001.2-RA	100	316	0	0	196	1143	1	948	0	827
Loquacious-PBb	GSSPFG00010630001.2-RA	99.46	184	1	0	749	198	554	3	0	497
Loquacious-PBb	GSSPFG00010630001.2-RA	100	119	0	0	1142	786	947	591	0	330
Loquacious-PBb	GSSPFG00010630001.2-RA	99.55	220	1	0	1143	484	948	289	0	593
Loquacious-PBb	GSSPFG00010630001.2-RA	97.33	75	2	0	420	196	225	1	0	204
Loquacious-PBb	GSSPFG00010630001.2-RA	97.83	230	5	0	197	886	2	691	0	589
Loquacious-PBb	GSSPFG00010630001.2-RA	100	37	0	0	1031	1141	836	946	0	108
Loquacious-PBb	GSSPFG00010630001.2-RA	95.65	23	1	0	932	1000	737	805	0	30.7
Loquacious-PBb	GSSPFG00027888001.2-RA	98.44	64	1	0	193	2	434	243	4e-50	196
Loquacious-PBb	GSSPFG00027888001.2-RA	98.46	65	1	0	195	1	436	242	8e-48	189
Loquacious-PBb	GSSPFG00027888001.2-RA	98.44	64	1	0	2	193	243	434	3e-47	187
Loquacious-PBb	GSSPFG00027888001.2-RA	98.44	64	1	0	3	194	244	435	1e-46	185
Loquacious-PBb	GSSPFG00027888001.2-RA	100	35	0	0	91	195	332	436	1e-23	108
Loquacious-PBb	GSSPFG00026292001-RA	37.5	40	25	0	604	723	1532	1651	2e-05	39.7
Loquacious-PBb	GSSPFG00026292001-RA	35.14	37	24	0	1021	1131	2405	2515	2e-05	31.4
Loquacious-PBb	GSSPFG00026231001-RA	39.53	43	26	0	598	726	667	795	0.002	38.2
Loquacious-PBb	GSSPFG00026231001-RA	43.33	30	17	0	274	363	208	297	0.002	25.5
Loquacious-PBb	GSSPFG00020883001-RA	39.53	43	26	0	598	726	667	795	0.002	38.2
Loquacious-PBb	GSSPFG00020883001-RA	43.33	30	17	0	274	363	208	297	0.002	25.5
Loquacious-PBb	GSSPFG00002685001-RA	41.67	36	21	0	121	14	1593	1486	0.006	39.1
Loquacious-PBb	GSSPFG00002685001-RA	47.06	17	9	0	1087	1037	2144	2094	0.006	23.3
Loquacious-PBb	GSSPFG00002806001-RA	57.14	21	9	0	6	68	10721	10659	0.014	38.6
Loquacious-PBb	GSSPFG00002907001-RA	58.33	24	10	0	94	23	793	864	0.037	34.7
Loquacious-PBb	GSSPFG00002907001-RA	85.71	7	1	0	1034	1014	668	688	0.037	24.3
Loquacious-PBb	GSSPFG00028410001-RA	43.75	32	18	0	33	128	820	725	0.04	37.1
Loquacious-PBb	GSSPFG00005564001-RA	55	20	9	0	708	767	977	1036	0.045	28.2
Loquacious-PBb	GSSPFG00005564001-RA	69.23	13	4	0	222	260	761	799	0.045	26.7
Loquacious-PBb	GSSPFG00005564001-RA	53.33	15	7	0	103	147	675	719	0.045	24
Loquacious-PBb	GSSPFG00010574001-RA	55	20	9	0	91	150	76	135	0.054	36.7
Loquacious-PA	GSSPFG00010630001.2-RA	97.34	188	5	0	760	197	565	2	0	508
Loquacious-PA	GSSPFG00010630001.2-RA	100	83	0	0	1007	759	947	699	0	234
Loquacious-PA	GSSPFG00010630001.2-RA	99.47	187	1	0	758	198	563	3	0	504
Loquacious-PA	GSSPFG00010630001.2-RA	98.8	83	1	0	1006	758	946	698	0	227
Loquacious-PA	GSSPFG00010630001.2-RA	100	188	0	0	196	759	1	564	0	487
Loquacious-PA	GSSPFG00010630001.2-RA	95.45	88	4	0	744	1007	684	947	0	235
Loquacious-PA	GSSPFG00010630001.2-RA	97.34	188	5	0	198	761	3	566	0	484
Loquacious-PA	GSSPFG00010630001.2-RA	98.81	84	1	0	757	1008	697	948	0	223
Loquacious-PA	GSSPFG00010630001.2-RA	100	92	0	0	759	484	564	289	0	253
Loquacious-PA	GSSPFG00010630001.2-RA	97.7	87	2	0	1008	748	948	688	0	226
Loquacious-PA	GSSPFG00010630001.2-RA	97.33	75	2	0	420	196	225	1	0	204
Loquacious-PA	GSSPFG00010630001.2-RA	97.3	185	5	0	197	751	2	556	6e-160	467
Loquacious-PA	GSSPFG00010630001.2-RA	100	37	0	0	896	1006	836	946	6e-160	108
Loquacious-PA	GSSPFG00010630001.2-RA	95.83	24	1	0	794	865	734	805	6e-160	35.2
Loquacious-PA	GSSPFG00027888001.2-RA	98.44	64	1	0	193	2	434	243	4e-50	196
Loquacious-PA	GSSPFG00027888001.2-RA	98.46	65	1	0	195	1	436	242	7e-48	189
Loquacious-PA	GSSPFG00027888001.2-RA	98.44	64	1	0	2	193	243	434	3e-47	187
Loquacious-PA	GSSPFG00027888001.2-RA	98.44	64	1	0	3	194	244	435	1e-46	185
Loquacious-PA	GSSPFG00027888001.2-RA	100	35	0	0	91	195	332	436	1e-23	108
Loquacious-PA	GSSPFG00026292001-RA	37.5	40	25	0	604	723	1532	1651	3e-06	39.6
Loquacious-PA	GSSPFG00026292001-RA	35.14	37	24	0	886	996	2405	2515	3e-06	31.3
Loquacious-PA	GSSPFG00026292001-RA	46.67	15	8	0	106	150	654	698	3e-06	22.5
Loquacious-PA	GSSPFG00026231001-RA	39.53	43	26	0	598	726	667	795	0.001	38.1
Loquacious-PA	GSSPFG00026231001-RA	43.33	30	17	0	274	363	208	297	0.001	25.5
Loquacious-PA	GSSPFG00020883001-RA	39.53	43	26	0	598	726	667	795	0.001	38.1
Loquacious-PA	GSSPFG00020883001-RA	43.33	30	17	0	274	363	208	297	0.001	25.5
Loquacious-PA	GSSPFG00005564001-RA	69.23	13	4	0	222	260	761	799	0.004	26.7
Loquacious-PA	GSSPFG00005564001-RA	50	20	10	0	708	767	977	1036	0.004	26.7
Loquacious-PA	GSSPFG00005564001-RA	53.33	15	7	0	103	147	675	719	0.004	24
Loquacious-PA	GSSPFG00005564001-RA	61.54	13	5	0	929	967	1989	2027	0.004	23.3
Loquacious-PA	GSSPFG00002685001-RA	41.67	36	21	0	121	14	1593	1486	0.004	39.1
Loquacious-PA	GSSPFG00002685001-RA	47.06	17	9	0	952	902	2144	2094	0.004	23.3
Loquacious-PA	GSSPFG00002806001-RA	57.14	21	9	0	6	68	10721	10659	0.013	38.6
Loquacious-PA	GSSPFG00002907001-RA	58.33	24	10	0	94	23	793	864	0.029	34.7
Loquacious-PA	GSSPFG00002907001-RA	85.71	7	1	0	899	879	668	688	0.029	24.3
Loquacious-PA	GSSPFG00028410001-RA	43.75	32	18	0	33	128	820	725	0.035	37.1
Loquacious-PA	GSSPFG00010574001-RA	55	20	9	0	91	150	76	135	0.049	36.7
Loquacious-PA	GSSPFG00005129001-RA	48.28	29	15	0	121	207	538	624	0.095	35.7
Loquacious-PD	GSSPFG00010630001.2-RA	97.34	188	5	0	760	197	565	2	3e-144	508
Loquacious-PD	GSSPFG00010630001.2-RA	99.47	187	1	0	758	198	563	3	5e-143	504
Loquacious-PD	GSSPFG00010630001.2-RA	100	188	0	0	196	759	1	564	2e-137	485
Loquacious-PD	GSSPFG00010630001.2-RA	97.34	188	5	0	198	761	3	566	6e-137	484
Loquacious-PD	GSSPFG00010630001.2-RA	97.34	188	5	0	197	760	2	565	2e-134	476
Loquacious-PD	GSSPFG00010630001.2-RA	100	92	0	0	759	484	564	289	1e-122	253
Loquacious-PD	GSSPFG00010630001.2-RA	97.33	75	2	0	420	196	225	1	1e-122	204
Loquacious-PD	GSSPFG00027888001.2-RA	98.44	64	1	0	193	2	434	243	3e-50	196
Loquacious-PD	GSSPFG00027888001.2-RA	98.46	65	1	0	195	1	436	242	5e-48	189
Loquacious-PD	GSSPFG00027888001.2-RA	98.44	64	1	0	2	193	243	434	2e-47	187
Loquacious-PD	GSSPFG00027888001.2-RA	98.44	64	1	0	3	194	244	435	8e-47	185
Loquacious-PD	GSSPFG00027888001.2-RA	100	35	0	0	91	195	332	436	1e-23	108
Loquacious-PD	GSSPFG00026231001-RA	39.53	43	26	0	598	726	667	795	0.0009	38
Loquacious-PD	GSSPFG00026231001-RA	43.33	30	17	0	274	363	208	297	0.0009	25.4
Loquacious-PD	GSSPFG00020883001-RA	39.53	43	26	0	598	726	667	795	0.0009	38
Loquacious-PD	GSSPFG00020883001-RA	43.33	30	17	0	274	363	208	297	0.0009	25.4
Loquacious-PD	GSSPFG00026292001-RA	37.5	40	25	0	604	723	1532	1651	0.004	39.5
Loquacious-PD	GSSPFG00026292001-RA	46.67	15	8	0	106	150	654	698	0.004	22.4
Loquacious-PD	GSSPFG00002685001-RA	41.67	36	21	0	121	14	1593	1486	0.007	39.1
Loquacious-PD	GSSPFG00002806001-RA	57.14	21	9	0	6	68	10721	10659	0.01	38.6
Loquacious-PD	GSSPFG00028410001-RA	43.75	32	18	0	33	128	820	725	0.027	37.1
Loquacious-PD	GSSPFG00010574001-RA	55	20	9	0	91	150	76	135	0.041	36.5
Loquacious-PD	GSSPFG00005564001-RA	69.23	13	4	0	222	260	761	799	0.056	26.7
Loquacious-PD	GSSPFG00005564001-RA	55.56	18	8	0	708	761	977	1030	0.056	26.2
Loquacious-PD	GSSPFG00005564001-RA	53.33	15	7	0	103	147	675	719	0.056	23.9
Loquacious-PD	GSSPFG00005129001-RA	48.28	29	15	0	121	207	538	624	0.08	35.6
Loquacious-PD	GSSPFG00019493001-RA	48.15	27	14	0	133	53	2064	1984	0.094	30.7
Loquacious-PD	GSSPFG00019493001-RA	50	22	11	0	257	192	2480	2415	0.094	26.2
Loquacious-PD	GSSPFG00033106001-RA	58.82	17	7	0	371	421	837	787	0.099	25.8
Loquacious-PD	GSSPFG00033106001-RA	53.33	15	7	0	12	56	1552	1508	0.099	24.8
Loquacious-PD	GSSPFG00033106001-RA	100	7	0	0	143	163	1043	1023	0.099	24.3
R2D2-PAa	GSSPFG00010630001.2-RA	46.51	43	23	0	70	198	73	201	1e-06	44.1
R2D2-PAa	GSSPFG00010630001.2-RA	56.25	16	7	0	13	60	19	66	1e-06	25.8
R2D2-PAb	GSSPFG00010630001.2-RA	46.51	43	23	0	70	198	73	201	1e-06	44.1
R2D2-PAb	GSSPFG00010630001.2-RA	56.25	16	7	0	13	60	19	66	1e-06	25.8
R2D2-PAc	GSSPFG00010630001.2-RA	46.51	43	23	0	70	198	73	201	1e-06	44.1
R2D2-PAc	GSSPFG00010630001.2-RA	56.25	16	7	0	13	60	19	66	1e-06	25.8
Argonaute 1-PCa	GSSPFG00027554001.3-RA	100	422	0	0	169	1434	302	1567	0	1204
Argonaute 1-PCa	GSSPFG00027554001.3-RA	98.82	423	5	0	1434	166	1567	299	0	1155
Argonaute 1-PCa	GSSPFG00027554001.3-RA	98.81	419	5	0	176	1432	309	1565	0	1108
Argonaute 1-PCa	GSSPFG00027554001.3-RA	98.91	368	4	0	3	1106	136	1239	0	1049
Argonaute 1-PCa	GSSPFG00027554001.3-RA	99.27	273	2	0	820	2	953	135	0	795
Argonaute 1-PCa	GSSPFG00027554001.3-RA	99.56	229	1	0	854	168	987	301	0	628
Argonaute 1-PCa	GSSPFG00027554001.3-RA	100	183	0	0	1433	885	1566	1018	0	472
Argonaute 1-PCa	GSSPFG00027554001.3-RA	98.15	162	3	0	1411	926	1544	1059	0	430
Argonaute 1-PCa	GSSPFG00027554001.3-RA	96.94	98	3	0	1152	1445	1285	1578	0	269
Argonaute 1-PCa	GSSPFG00027554001.3-RA	100	23	0	0	69	1	202	134	0	75.7
Argonaute 1-PCa	GSSPFG00027554001.3-RA	100	24	0	0	2	73	135	206	0	62.4
Argonaute 1-PCa	GSSPFG00027554001.3-RA	100	20	0	0	907	848	1040	981	0	58.4
Argonaute 1-PCa	GSSPFG00027554001.3-RA	100	12	0	0	38	3	171	136	0	35.2
Argonaute 1-PCa	GSSPFG00027554001.3-RA	100	13	0	0	1	39	134	172	0.007	41.1
Argonaute 1-PCa	GSSPFG00005772001.2-RA	100	217	0	0	2089	2739	1	651	3e-178	623
Argonaute 1-PCa	GSSPFG00005772001.2-RA	99.54	216	1	0	2738	2091	650	3	4e-176	616
Argonaute 1-PCa	GSSPFG00005772001.2-RA	97.69	130	3	0	2091	2480	3	392	1e-133	368
Argonaute 1-PCa	GSSPFG00005772001.2-RA	100	42	0	0	2535	2660	447	572	1e-133	123
Argonaute 1-PCa	GSSPFG00005772001.2-RA	100	8	0	0	2715	2738	627	650	1e-133	24.3
Argonaute 1-PCa	GSSPFG00005772001.2-RA	96.83	63	2	0	2479	2291	391	203	3e-85	175
Argonaute 1-PCa	GSSPFG00005772001.2-RA	97.92	48	1	0	2233	2090	145	2	3e-85	122
Argonaute 1-PCa	GSSPFG00005772001.2-RA	100	13	0	0	2572	2534	484	446	3e-85	42.6
Argonaute 1-PCa	GSSPFG00005772001.2-RA	100	11	0	0	2523	2491	435	403	3e-85	29.2
Argonaute 1-PCa	GSSPFG00005772001.2-RA	100	22	0	0	2739	2674	651	586	3e-85	22.3
Argonaute 1-PCa	GSSPFG00005772001.2-RA	98.04	102	2	0	2430	2125	342	37	3e-70	264
Argonaute 1-PCa	GSSPFG00005772001.2-RA	98.25	114	2	0	2090	2431	2	343	1e-59	229
Argonaute 1-PCa	GSSPFG00033619001.2-RA	100	167	0	0	1561	2061	1	501	6e-122	436
Argonaute 1-PCa	GSSPFG00033619001.2-RA	99.38	161	1	0	2045	1563	485	3	6e-116	416
Argonaute 1-PCa	GSSPFG00033619001.2-RA	98.05	154	3	0	1563	2024	3	464	8e-109	388
Argonaute 1-PCa	GSSPFG00033619001.2-RA	100	7	0	0	2042	2062	482	502	8e-109	25.3
Argonaute 1-PCa	GSSPFG00033619001.2-RA	98.41	126	2	0	1938	1561	378	1	7e-97	353
Argonaute 1-PCa	GSSPFG00033619001.2-RA	97.71	131	3	0	1984	1592	424	32	4e-84	310
Argonaute 1-PCa	GSSPFG00033619001.2-RA	99.12	114	1	0	1592	1933	32	373	1e-75	282
Argonaute 1-PCa	GSSPFG00001770001.6-RA	55.81	86	38	0	2344	2601	3025	3282	3e-88	137
Argonaute 1-PCa	GSSPFG00001770001.6-RA	31.72	145	99	0	973	1407	1705	2139	3e-88	102
Argonaute 1-PCa	GSSPFG00001770001.6-RA	37.62	101	63	0	1927	2229	2617	2919	3e-88	92.1
Argonaute 1-PCa	GSSPFG00001770001.6-RA	36.17	47	30	0	1741	1881	2428	2568	3e-88	44.6
Argonaute 1-PCa	GSSPFG00001770001.6-RA	72.22	18	5	0	2254	2307	2947	3000	3e-88	40.6
Argonaute 1-PCa	GSSPFG00001770001.6-RA	32.14	28	19	0	259	342	991	1074	3e-88	26.2
Argonaute 1-PCa	GSSPFG00001770001.6-RA	60	20	8	0	2219	2160	2909	2850	8e-10	35.6
Argonaute 1-PCa	GSSPFG00001770001.6-RA	51.28	39	19	0	2471	2355	3152	3036	8e-10	34.7
Argonaute 1-PCa	GSSPFG00001770001.6-RA	57.89	19	8	0	2306	2250	2999	2943	8e-10	28.7
Argonaute 1-PCa	GSSPFG00005884001.3-RA	39	100	61	0	2332	2631	2352	2651	1e-28	86.6
Argonaute 1-PCa	GSSPFG00005884001.3-RA	32.81	64	43	0	2116	2307	2151	2342	1e-28	56.9
Argonaute 1-PCa	GSSPFG00005884001.3-RA	50	20	10	0	1330	1389	1407	1466	1e-28	33.2
Argonaute 1-PCa	GSSPFG00031765001.6-RA	44.87	78	43	0	2356	2589	2491	2724	5e-28	82.2
Argonaute 1-PCa	GSSPFG00031765001.6-RA	40.3	67	40	0	2107	2307	2254	2454	5e-28	61.9
Argonaute 1-PCa	GSSPFG00031425001.5-RA	38.78	98	60	0	2332	2625	2605	2898	3e-27	82.7
Argonaute 1-PCa	GSSPFG00031425001.5-RA	37.5	64	40	0	2116	2307	2404	2595	3e-27	58.9
Argonaute 1-PCa	GSSPFG00031425001.5-RA	45.95	37	20	0	2597	2487	2870	2760	0.004	38.6
Argonaute 1-PCa	GSSPFG00031425001.5-RA	60	15	6	0	2183	2139	2471	2427	0.004	27.2
Argonaute 1-PCa	GSSPFG00001860001-RA	35.48	31	20	0	138	230	377	469	2e-05	36.1
Argonaute 1-PCa	GSSPFG00001860001-RA	43.33	30	17	0	1368	1457	1040	1129	2e-05	32.7
Argonaute 1-PCa	GSSPFG00001860001-RA	42.31	26	15	0	2577	2654	1206	1283	2e-05	24.3
Argonaute 1-PCa	GSSPFG00002157001.1-RA	51.61	31	15	0	2547	2639	1044	1136	7e-05	36.1
Argonaute 1-PCa	GSSPFG00002157001.1-RA	47.37	19	10	0	144	200	593	649	7e-05	34.7
Argonaute 1-PCa	GSSPFG00007432001-RA	50	32	16	0	2556	2651	2535	2630	0.0003	35.6
Argonaute 1-PCa	GSSPFG00007432001-RA	46.67	15	8	0	144	188	479	523	0.0003	29.2
Argonaute 1-PCa	GSSPFG00007432001-RA	33.33	27	18	0	1607	1687	1169	1249	0.0003	26.7
Argonaute 1-PCa	GSSPFG00029314001-RA	58.33	24	10	0	2556	2627	629	700	0.002	42.6
Argonaute 1-PCa	GSSPFG00027085001-RA	70	20	6	0	2586	2645	1725	1666	0.013	40.1
Argonaute 1-PCa	GSSPFG00018297001.3-RA	63.16	19	7	0	169	113	570	626	0.022	36.6
Argonaute 1-PCa	GSSPFG00018297001.3-RA	47.06	17	9	0	421	371	294	344	0.022	25.8
Argonaute 1-PCa	GSSPFG00002222001-RA	48	25	13	0	184	258	2966	3040	0.031	29.2
Argonaute 1-PCa	GSSPFG00002222001-RA	47.37	19	10	0	2111	2167	3239	3295	0.031	27.7
Argonaute 1-PCa	GSSPFG00002222001-RA	75	8	2	0	90	113	2447	2470	0.031	27.2
Argonaute 1-PCa	GSSPFG00020046001-RA	39.13	23	14	0	2522	2454	1185	1253	0.036	34.2
Argonaute 1-PCa	GSSPFG00020046001-RA	40	25	15	0	1666	1592	1353	1427	0.036	27.2
Argonaute 1-PCb	GSSPFG00027554001.3-RA	100	422	0	0	169	1434	302	1567	0	1204
Argonaute 1-PCb	GSSPFG00027554001.3-RA	98.82	423	5	0	1434	166	1567	299	0	1155
Argonaute 1-PCb	GSSPFG00027554001.3-RA	98.81	419	5	0	176	1432	309	1565	0	1108
Argonaute 1-PCb	GSSPFG00027554001.3-RA	98.91	368	4	0	3	1106	136	1239	0	1049
Argonaute 1-PCb	GSSPFG00027554001.3-RA	99.27	273	2	0	820	2	953	135	0	795
Argonaute 1-PCb	GSSPFG00027554001.3-RA	99.56	229	1	0	854	168	987	301	0	628
Argonaute 1-PCb	GSSPFG00027554001.3-RA	100	183	0	0	1433	885	1566	1018	0	472
Argonaute 1-PCb	GSSPFG00027554001.3-RA	98.15	162	3	0	1411	926	1544	1059	0	430
Argonaute 1-PCb	GSSPFG00027554001.3-RA	96.94	98	3	0	1152	1445	1285	1578	0	269
Argonaute 1-PCb	GSSPFG00027554001.3-RA	100	23	0	0	69	1	202	134	0	75.7
Argonaute 1-PCb	GSSPFG00027554001.3-RA	100	24	0	0	2	73	135	206	0	62.4
Argonaute 1-PCb	GSSPFG00027554001.3-RA	100	20	0	0	907	848	1040	981	0	58.4
Argonaute 1-PCb	GSSPFG00027554001.3-RA	100	12	0	0	38	3	171	136	0	35.2
Argonaute 1-PCb	GSSPFG00027554001.3-RA	100	13	0	0	1	39	134	172	0.007	41.1
Argonaute 1-PCb	GSSPFG00005772001.2-RA	100	217	0	0	2137	2787	1	651	3e-178	623
Argonaute 1-PCb	GSSPFG00005772001.2-RA	99.54	216	1	0	2786	2139	650	3	4e-176	616
Argonaute 1-PCb	GSSPFG00005772001.2-RA	97.69	130	3	0	2139	2528	3	392	1e-133	368
Argonaute 1-PCb	GSSPFG00005772001.2-RA	100	42	0	0	2583	2708	447	572	1e-133	123
Argonaute 1-PCb	GSSPFG00005772001.2-RA	100	8	0	0	2763	2786	627	650	1e-133	24.3
Argonaute 1-PCb	GSSPFG00005772001.2-RA	96.83	63	2	0	2527	2339	391	203	3e-85	175
Argonaute 1-PCb	GSSPFG00005772001.2-RA	97.92	48	1	0	2281	2138	145	2	3e-85	122
Argonaute 1-PCb	GSSPFG00005772001.2-RA	100	13	0	0	2620	2582	484	446	3e-85	42.6
Argonaute 1-PCb	GSSPFG00005772001.2-RA	100	11	0	0	2571	2539	435	403	3e-85	29.2
Argonaute 1-PCb	GSSPFG00005772001.2-RA	100	22	0	0	2787	2722	651	586	3e-85	22.3
Argonaute 1-PCb	GSSPFG00005772001.2-RA	98.04	102	2	0	2478	2173	342	37	3e-70	264
Argonaute 1-PCb	GSSPFG00005772001.2-RA	98.25	114	2	0	2138	2479	2	343	1e-59	229
Argonaute 1-PCb	GSSPFG00033619001.2-RA	99.4	166	1	0	2060	1563	500	3	3e-121	434
Argonaute 1-PCb	GSSPFG00033619001.2-RA	100	166	0	0	1561	2058	1	498	5e-121	433
Argonaute 1-PCb	GSSPFG00033619001.2-RA	98.19	166	3	0	1563	2060	3	500	1e-117	422
Argonaute 1-PCb	GSSPFG00033619001.2-RA	98.41	126	2	0	1938	1561	378	1	7e-97	353
Argonaute 1-PCb	GSSPFG00033619001.2-RA	97.71	131	3	0	1984	1592	424	32	4e-84	310
Argonaute 1-PCb	GSSPFG00033619001.2-RA	99.12	114	1	0	1592	1933	32	373	5e-76	282
Argonaute 1-PCb	GSSPFG00033619001.2-RA	100	6	0	0	2042	2059	482	499	5e-76	22.3
Argonaute 1-PCb	GSSPFG00001770001.6-RA	55.81	86	38	0	2392	2649	3025	3282	6e-84	137
Argonaute 1-PCb	GSSPFG00001770001.6-RA	31.72	145	99	0	973	1407	1705	2139	6e-84	102
Argonaute 1-PCb	GSSPFG00001770001.6-RA	38.6	57	35	0	2107	2277	2749	2919	6e-84	56.4
Argonaute 1-PCb	GSSPFG00001770001.6-RA	36.17	47	30	0	1741	1881	2428	2568	6e-84	44.6
Argonaute 1-PCb	GSSPFG00001770001.6-RA	40.48	42	25	0	1927	2052	2617	2742	6e-84	41.6
Argonaute 1-PCb	GSSPFG00001770001.6-RA	72.22	18	5	0	2302	2355	2947	3000	6e-84	40.6
Argonaute 1-PCb	GSSPFG00001770001.6-RA	32.14	28	19	0	259	342	991	1074	6e-84	26.2
Argonaute 1-PCb	GSSPFG00001770001.6-RA	60	20	8	0	2267	2208	2909	2850	8e-10	35.6
Argonaute 1-PCb	GSSPFG00001770001.6-RA	51.28	39	19	0	2519	2403	3152	3036	8e-10	34.7
Argonaute 1-PCb	GSSPFG00001770001.6-RA	57.89	19	8	0	2354	2298	2999	2943	8e-10	28.7
Argonaute 1-PCb	GSSPFG00005884001.3-RA	39	100	61	0	2380	2679	2352	2651	1e-28	86.6
Argonaute 1-PCb	GSSPFG00005884001.3-RA	32.81	64	43	0	2164	2355	2151	2342	1e-28	56.9
Argonaute 1-PCb	GSSPFG00005884001.3-RA	50	20	10	0	1330	1389	1407	1466	1e-28	33.2
Argonaute 1-PCb	GSSPFG00031765001.6-RA	44.87	78	43	0	2404	2637	2491	2724	5e-28	82.2
Argonaute 1-PCb	GSSPFG00031765001.6-RA	40.3	67	40	0	2155	2355	2254	2454	5e-28	61.9
Argonaute 1-PCb	GSSPFG00031425001.5-RA	38.78	98	60	0	2380	2673	2605	2898	3e-27	82.7
Argonaute 1-PCb	GSSPFG00031425001.5-RA	37.5	64	40	0	2164	2355	2404	2595	3e-27	58.9
Argonaute 1-PCb	GSSPFG00031425001.5-RA	45.95	37	20	0	2645	2535	2870	2760	0.004	38.6
Argonaute 1-PCb	GSSPFG00031425001.5-RA	60	15	6	0	2231	2187	2471	2427	0.004	27.2
Argonaute 1-PCb	GSSPFG00002157001.1-RA	51.61	31	15	0	2595	2687	1044	1136	4e-06	36.1
Argonaute 1-PCb	GSSPFG00002157001.1-RA	47.37	19	10	0	144	200	593	649	4e-06	34.7
Argonaute 1-PCb	GSSPFG00002157001.1-RA	58.82	17	7	0	2010	2060	1017	1067	4e-06	24.8
Argonaute 1-PCb	GSSPFG00001860001-RA	35.48	31	20	0	138	230	377	469	2e-05	36.1
Argonaute 1-PCb	GSSPFG00001860001-RA	43.33	30	17	0	1368	1457	1040	1129	2e-05	32.7
Argonaute 1-PCb	GSSPFG00001860001-RA	42.31	26	15	0	2625	2702	1206	1283	2e-05	24.3
Argonaute 1-PCb	GSSPFG00007432001-RA	50	32	16	0	2604	2699	2535	2630	3e-05	35.6
Argonaute 1-PCb	GSSPFG00007432001-RA	46.67	15	8	0	144	188	479	523	3e-05	29.2
Argonaute 1-PCb	GSSPFG00007432001-RA	56.25	16	7	0	1758	1805	914	961	3e-05	26.7
Argonaute 1-PCb	GSSPFG00007432001-RA	42.86	28	16	0	1986	2069	1035	1118	3e-05	24.3
Argonaute 1-PCb	GSSPFG00029314001-RA	58.33	24	10	0	2604	2675	629	700	0.002	42.6
Argonaute 1-PCb	GSSPFG00027085001-RA	70	20	6	0	2634	2693	1725	1666	0.013	40.1
Argonaute 1-PCb	GSSPFG00018297001.3-RA	63.16	19	7	0	169	113	570	626	0.022	36.6
Argonaute 1-PCb	GSSPFG00018297001.3-RA	47.06	17	9	0	421	371	294	344	0.022	25.8
Argonaute 1-PCb	GSSPFG00002222001-RA	48	25	13	0	184	258	2966	3040	0.032	29.2
Argonaute 1-PCb	GSSPFG00002222001-RA	47.37	19	10	0	2159	2215	3239	3295	0.032	27.7
Argonaute 1-PCb	GSSPFG00002222001-RA	75	8	2	0	90	113	2447	2470	0.032	27.2
Argonaute 1-PCb	GSSPFG00020046001-RA	39.13	23	14	0	2570	2502	1185	1253	0.037	34.2
Argonaute 1-PCb	GSSPFG00020046001-RA	40	25	15	0	1666	1592	1353	1427	0.037	27.2
Argonaute 1-PCb	GSSPFG00032403001.2-RA	60	20	8	0	1989	2048	3862	3921	0.053	30.2
Argonaute 1-PCb	GSSPFG00032403001.2-RA	43.48	23	13	0	1616	1684	1274	1342	0.053	27.7
Argonaute 1-PCb	GSSPFG00032403001.2-RA	70	10	3	0	147	176	260	289	0.053	27.2
Argonaute 1-PCb	GSSPFG00024806001.1-RA	61.11	18	7	0	473	526	4022	4075	0.063	30.2
Argonaute 1-PCb	GSSPFG00024806001.1-RA	64.29	14	5	0	2010	2051	15084	15125	0.063	27.2
Argonaute 1-PCb	GSSPFG00024806001.1-RA	53.85	13	6	0	207	245	163	201	0.063	26.2
Argonaute 1-PCb	GSSPFG00024806001.1-RA	39.29	28	17	0	2138	2221	17039	17122	0.063	25.8
Argonaute 2-PEa	GSSPFG00001770001.6-RA	99.54	868	4	0	682	3285	787	3390	0	2417
Argonaute 2-PEa	GSSPFG00001770001.6-RA	91.63	836	70	0	3285	778	3390	883	0	2108
Argonaute 2-PEa	GSSPFG00001770001.6-RA	97.03	707	21	0	2648	528	2753	633	0	1807
Argonaute 2-PEa	GSSPFG00001770001.6-RA	88.76	516	58	0	780	2327	885	2432	0	1213
Argonaute 2-PEa	GSSPFG00001770001.6-RA	93.99	449	27	0	3283	1937	3388	2042	0	1165
Argonaute 2-PEa	GSSPFG00001770001.6-RA	93.18	308	21	0	2361	3284	2466	3389	0	776
Argonaute 2-PEa	GSSPFG00001770001.6-RA	93.45	290	19	0	2414	3283	2519	3388	0	719
Argonaute 2-PEa	GSSPFG00001770001.6-RA	84.96	266	40	0	1894	1097	1999	1202	0	597
Argonaute 2-PEa	GSSPFG00001770001.6-RA	92.34	261	20	0	1598	2380	1703	2485	0	578
Argonaute 2-PEa	GSSPFG00001770001.6-RA	88.28	256	30	0	785	1552	890	1657	0	550
Argonaute 2-PEa	GSSPFG00001770001.6-RA	100	124	0	0	3059	2688	3164	2793	0	353
Argonaute 2-PEa	GSSPFG00001770001.6-RA	91.6	119	10	0	153	509	258	614	0	277
Argonaute 2-PEa	GSSPFG00001770001.6-RA	89.89	89	9	0	1045	779	1150	884	0	205
Argonaute 2-PEa	GSSPFG00001770001.6-RA	96.47	85	3	0	709	455	814	560	0	203
Argonaute 2-PEa	GSSPFG00001770001.6-RA	98.51	67	1	0	187	387	292	492	0	185
Argonaute 2-PEa	GSSPFG00001770001.6-RA	96.61	59	2	0	729	553	834	658	0	180
Argonaute 2-PEa	GSSPFG00001770001.6-RA	96.97	66	2	0	527	724	632	829	0	152
Argonaute 2-PEa	GSSPFG00001770001.6-RA	95.12	41	2	0	600	722	705	827	0	126
Argonaute 2-PEa	GSSPFG00001770001.6-RA	97.06	34	1	0	3191	3090	3296	3195	0	90.6
Argonaute 2-PEa	GSSPFG00001770001.6-RA	94.12	34	2	0	327	226	432	331	0	84.1
Argonaute 2-PEa	GSSPFG00001770001.6-RA	100	27	0	0	556	636	661	741	0	80
Argonaute 2-PEa	GSSPFG00001770001.6-RA	96	25	1	0	223	149	328	254	0	69.8
Argonaute 2-PEa	GSSPFG00001770001.6-RA	89.47	19	2	0	147	91	252	196	0	62.4
Argonaute 2-PEa	GSSPFG00001770001.6-RA	100	21	0	0	382	320	487	425	0	58.9
Argonaute 2-PEa	GSSPFG00001770001.6-RA	82.61	23	4	0	407	475	512	580	0	52.5
Argonaute 2-PEa	GSSPFG00001770001.6-RA	94.12	17	1	0	106	56	211	161	0	46
Argonaute 2-PEa	GSSPFG00001770001.6-RA	91.67	12	1	0	60	95	165	200	0	33.2
Argonaute 2-PEa	GSSPFG00001770001.6-RA	58.82	17	7	0	730	780	817	867	0	33.1
Argonaute 2-PEa	GSSPFG00001770001.6-RA	52.94	17	8	0	712	762	835	885	0	32.6
Argonaute 2-PEa	GSSPFG00001770001.6-RA	100	9	0	0	470	444	575	549	0	32.2
Argonaute 2-PEa	GSSPFG00001770001.6-RA	100	11	0	0	3284	3252	3389	3357	0	31.2
Argonaute 2-PEa	GSSPFG00001770001.6-RA	55.56	18	8	0	782	729	869	816	0	30.7
Argonaute 2-PEa	GSSPFG00001770001.6-RA	100	10	0	0	112	141	217	246	0	28.7
Argonaute 2-PEa	GSSPFG00001770001.6-RA	42.86	21	12	0	764	702	887	825	0	28.7
Argonaute 2-PEa	GSSPFG00001770001.6-RA	100	8	0	0	131	154	236	259	0	23.3
Argonaute 2-PEa	GSSPFG00001770001.6-RA	94.29	35	2	0	224	328	329	433	1e-17	90.1
Argonaute 2-PEa	GSSPFG00001770001.6-RA	96.88	32	1	0	281	186	386	291	4e-11	49
Argonaute 2-PEa	GSSPFG00001770001.6-RA	100	13	0	0	386	348	491	453	4e-11	38.1
Argonaute 2-PEa	GSSPFG00001770001.6-RA	40	35	21	0	259	363	346	450	0.065	38
Argonaute 2-PEa	GSSPFG00005772001.2-RA	55.81	86	38	0	2920	3177	256	513	5e-47	137
Argonaute 2-PEa	GSSPFG00005772001.2-RA	53.33	30	14	0	2725	2814	52	141	5e-47	48.9
Argonaute 2-PEa	GSSPFG00005772001.2-RA	72.22	18	5	0	2842	2895	166	219	5e-47	40.5
Argonaute 2-PEa	GSSPFG00005772001.2-RA	60	20	8	0	2804	2745	131	72	1e-09	35.6
Argonaute 2-PEa	GSSPFG00005772001.2-RA	51.28	39	19	0	3047	2931	383	267	1e-09	34.7
Argonaute 2-PEa	GSSPFG00005772001.2-RA	57.89	19	8	0	2894	2838	218	162	1e-09	28.7
Argonaute 2-PEa	GSSPFG00031765001.6-RA	41.35	104	61	0	2845	3156	2404	2715	7e-22	101
Argonaute 2-PEa	GSSPFG00031765001.6-RA	32.14	28	19	0	886	969	538	621	7e-22	29.2
Argonaute 2-PEa	GSSPFG00027554001.3-RA	31.72	145	99	0	1600	2034	1106	1540	1e-21	102
Argonaute 2-PEa	GSSPFG00027554001.3-RA	32.14	28	19	0	886	969	392	475	1e-21	26.2
Argonaute 2-PEa	GSSPFG00031425001.5-RA	40.51	79	47	0	2920	3156	2617	2853	3e-19	71.6
Argonaute 2-PEa	GSSPFG00031425001.5-RA	46.67	30	16	0	2716	2805	2419	2508	3e-19	43
Argonaute 2-PEa	GSSPFG00031425001.5-RA	34.48	29	19	0	739	825	358	444	3e-19	26.2
Argonaute 2-PEa	GSSPFG00031425001.5-RA	47.06	17	9	0	2673	2723	1408	1458	3e-19	24.8
Argonaute 2-PEa	GSSPFG00005884001.3-RA	39.24	79	48	0	2920	3156	2364	2600	3e-12	72.6
Argonaute 2-PEa	GSSPFG00033619001.2-RA	36.17	47	30	0	2323	2463	181	321	1e-10	44.5
Argonaute 2-PEa	GSSPFG00033619001.2-RA	40.48	42	25	0	2512	2637	367	492	1e-10	41.5
Argonaute 2-PEa	GSSPFG00018794001.3-RA	40	35	21	0	706	810	414	518	3e-05	39
Argonaute 2-PEa	GSSPFG00018794001.3-RA	43.48	23	13	0	568	636	345	413	3e-05	28.2
Argonaute 2-PEa	GSSPFG00018794001.3-RA	34.88	43	28	0	682	810	342	470	0.033	39
Argonaute 2-PEa	GSSPFG00018794001.3-RA	36.11	36	23	0	809	702	523	416	0.046	32.2
Argonaute 2-PEa	GSSPFG00018794001.3-RA	50	12	6	0	615	580	416	381	0.046	23.8
Argonaute 2-PEa	GSSPFG00018794001.3-RA	37.84	37	23	0	700	810	354	464	0.046	38.5
Argonaute 2-PEa	GSSPFG00033669001.1-RA	43.33	30	17	0	706	795	329	240	0.0001	37.5
Argonaute 2-PEa	GSSPFG00033669001.1-RA	47.37	19	10	0	539	595	409	353	0.0001	27.2
Argonaute 2-PEa	GSSPFG00033669001.1-RA	44.44	27	15	0	730	810	557	477	0.095	32.6
Argonaute 2-PEa	GSSPFG00033669001.1-RA	46.67	15	8	0	706	750	695	651	0.095	22.2
Argonaute 2-PEa	GSSPFG00029603001-RA	44	25	14	0	706	780	1003	1077	0.001	37.1
Argonaute 2-PEa	GSSPFG00029603001-RA	30.3	33	23	0	286	384	904	1002	0.001	27.2
Argonaute 2-PEa	GSSPFG00029603001-RA	39.13	23	14	0	241	309	379	447	0.001	24.7
Argonaute 2-PEa	GSSPFG00029603001-RA	38.46	26	16	0	706	783	1021	1098	0.029	33.6
Argonaute 2-PEa	GSSPFG00029603001-RA	34.29	35	23	0	244	348	931	1035	0.029	29.2
Argonaute 2-PEa	GSSPFG00029603001-RA	34.21	38	25	0	700	813	895	1008	0.04	34.6
Argonaute 2-PEa	GSSPFG00029603001-RA	25	48	36	0	238	381	307	450	0.04	27.7
Argonaute 2-PEa	GSSPFG00003803001-RA	34.48	29	19	0	694	780	2731	2817	0.001	33.6
Argonaute 2-PEa	GSSPFG00003803001-RA	40	25	15	0	754	828	3445	3519	0.001	29.6
Argonaute 2-PEa	GSSPFG00003803001-RA	35.29	34	22	0	283	384	517	618	0.001	27.2
Argonaute 2-PEa	GSSPFG00013146001-RA	33.33	42	28	0	685	810	650	775	0.001	37.5
Argonaute 2-PEa	GSSPFG00013146001-RA	45.45	11	6	0	642	674	571	603	0.001	23.8
Argonaute 2-PEa	GSSPFG00027346001.1-RA	35	40	26	0	706	825	2980	3099	0.002	43.5
Argonaute 2-PEa	GSSPFG00027346001.1-RA	34.38	32	21	0	700	795	3010	3105	0.023	39.5
Argonaute 2-PEa	GSSPFG00010800001-RA	40	40	24	0	706	825	1610	1491	0.002	43.5
Argonaute 2-PEa	GSSPFG00010800001-RA	35.56	45	29	0	691	825	1661	1527	0.008	41
Argonaute 2-PEa	GSSPFG00010800001-RA	37.5	40	25	0	706	825	1520	1401	0.012	40.5
Argonaute 2-PEa	GSSPFG00010800001-RA	36.84	38	24	0	712	825	1586	1473	0.017	40
Argonaute 2-PEa	GSSPFG00010800001-RA	40	35	21	0	706	810	1538	1434	0.092	37.5
Argonaute 2-PEa	GSSPFG00020203001-RA	44	25	14	0	706	780	1617	1691	0.002	36.6
Argonaute 2-PEa	GSSPFG00020203001-RA	25	48	36	0	244	387	975	1118	0.002	31.1
Argonaute 2-PEa	GSSPFG00020203001-RA	40.74	27	16	0	706	786	1635	1715	0.007	35.6
Argonaute 2-PEa	GSSPFG00020203001-RA	38.24	34	21	0	247	348	1023	1124	0.007	30.1
Argonaute 2-PEa	GSSPFG00020203001-RA	40.74	27	16	0	706	786	1665	1745	0.013	35.6
Argonaute 2-PEa	GSSPFG00020203001-RA	34.29	35	23	0	244	348	1545	1649	0.013	29.2
Argonaute 2-PEa	GSSPFG00030325001-RA	34.38	32	21	0	736	831	811	716	0.004	31.1
Argonaute 2-PEa	GSSPFG00030325001-RA	60	15	6	0	592	636	957	913	0.004	28.7
Argonaute 2-PEa	GSSPFG00020071001.1-RA	41.67	24	14	0	730	801	1753	1824	0.005	32.1
Argonaute 2-PEa	GSSPFG00020071001.1-RA	43.48	23	13	0	568	636	1708	1776	0.005	27.2
Argonaute 2-PEa	GSSPFG00028216001-RA	42.86	28	16	0	685	768	797	714	0.01	33.1
Argonaute 2-PEa	GSSPFG00028216001-RA	45.45	22	12	0	742	807	444	379	0.01	31.6
Argonaute 2-PEa	GSSPFG00010920001-RA	58.82	17	7	0	571	621	460	510	0.01	32.1
Argonaute 2-PEa	GSSPFG00010920001-RA	52.63	19	9	0	2878	2934	1273	1329	0.01	27.2
Argonaute 2-PEa	GSSPFG00010920001-RA	39.13	23	14	0	730	798	826	894	0.01	26.2
Argonaute 2-PEa	GSSPFG00002396001-RA	33.33	45	30	0	703	837	403	537	0.017	40
Argonaute 2-PEa	GSSPFG00024896001-RA	36.84	38	24	0	685	798	812	699	0.017	40
Argonaute 2-PEa	GSSPFG00004589001.1-RA	58.33	24	10	0	730	801	318	389	0.023	39.5
Argonaute 2-PEa	GSSPFG00025551001-RA	45.83	24	13	0	724	795	430	501	0.023	39.5
Argonaute 2-PEa	GSSPFG00025088001.1-RA	37.04	27	17	0	715	795	943	1023	0.025	32.6
Argonaute 2-PEa	GSSPFG00025088001.1-RA	42.86	21	12	0	574	636	775	837	0.025	24.2
Argonaute 2-PEa	GSSPFG00025088001.1-RA	37.14	35	22	0	706	810	766	870	0.046	38.5
Argonaute 2-PEa	GSSPFG00030235001-RA	52.94	17	8	0	730	780	559	609	0.027	31.1
Argonaute 2-PEa	GSSPFG00030235001-RA	38.1	21	13	0	559	621	505	567	0.027	25.7
Argonaute 2-PEa	GSSPFG00030235001-RA	35.71	42	27	0	703	828	538	663	0.065	38
Argonaute 2-PEa	GSSPFG00026142001-RA	42.31	26	15	0	624	701	715	638	0.031	39.1
Argonaute 2-PEa	GSSPFG00029410001.1-RA	35.14	37	24	0	718	828	220	330	0.033	39
Argonaute 2-PEa	GSSPFG00000400001-RA	36.36	44	28	0	706	837	2743	2612	0.033	39
Argonaute 2-PEa	GSSPFG00017394001-RA	37.5	40	25	0	697	816	202	321	0.033	39
Argonaute 2-PEa	GSSPFG00005041001.1-RA	43.24	37	21	0	235	345	316	426	0.035	35.1
Argonaute 2-PEa	GSSPFG00005041001.1-RA	32.35	34	23	0	712	813	559	660	0.035	26.2
Argonaute 2-PEa	GSSPFG00034389001-RA	64.71	17	6	0	2870	2920	485	435	0.038	31.2
Argonaute 2-PEa	GSSPFG00034389001-RA	50	24	12	0	700	771	636	565	0.038	30.1
Argonaute 2-PEa	GSSPFG00029241001-RA	40.74	27	16	0	706	786	10816	10736	0.042	29.2
Argonaute 2-PEa	GSSPFG00029241001-RA	37.5	24	15	0	565	636	10864	10793	0.042	26.7
Argonaute 2-PEa	GSSPFG00030312001.1-RA	37.84	37	23	0	715	825	1393	1283	0.046	38.5
Argonaute 2-PEa	GSSPFG00022740001-RA	37.84	37	23	0	685	795	341	231	0.046	38.5
Argonaute 2-PEa	GSSPFG00005144001-RA	31.37	51	35	0	727	879	1452	1604	0.046	38.5
Argonaute 2-PEa	GSSPFG00007104001-RA	50	30	15	0	693	604	1170	1259	0.062	38.1
Argonaute 2-PEa	GSSPFG00013332001-RA	56	25	11	0	706	780	1238	1312	0.065	38
Argonaute 2-PEa	GSSPFG00028702001-RA	37.5	40	25	0	706	825	2707	2826	0.065	38
Argonaute 2-PEa	GSSPFG00019794001-RA	44.44	27	15	0	700	780	658	738	0.076	33.1
Argonaute 2-PEa	GSSPFG00019794001-RA	34.29	35	23	0	253	357	577	681	0.076	27.2
Argonaute 2-PEa	GSSPFG00003696001-RA	44.83	29	16	0	682	768	2510	2596	0.092	37.5
Argonaute 2-PEa	GSSPFG00025967001.1-RA	40	20	12	0	841	900	594	653	0.097	28.7
Argonaute 2-PEa	GSSPFG00025967001.1-RA	52.94	17	8	0	2816	2866	1535	1585	0.097	28.7
Argonaute 2-PEa	GSSPFG00025967001.1-RA	42.86	21	12	0	574	636	79	141	0.097	26.2
Argonaute 2-PEb	GSSPFG00001770001.6-RA	99.39	825	5	0	436	2910	916	3390	0	2293
Argonaute 2-PEb	GSSPFG00001770001.6-RA	91.03	836	75	0	2910	403	3390	883	0	2057
Argonaute 2-PEb	GSSPFG00001770001.6-RA	95.92	613	25	0	2273	435	2753	915	0	1526
Argonaute 2-PEb	GSSPFG00001770001.6-RA	89.73	516	53	0	405	1952	885	2432	0	1238
Argonaute 2-PEb	GSSPFG00001770001.6-RA	90.87	449	41	0	2908	1562	3388	2042	0	1115
Argonaute 2-PEb	GSSPFG00001770001.6-RA	90.06	473	47	0	404	1822	884	2302	0	1045
Argonaute 2-PEb	GSSPFG00001770001.6-RA	90.58	308	29	0	1986	2909	2466	3389	0	715
Argonaute 2-PEb	GSSPFG00001770001.6-RA	90.69	290	27	0	2039	2908	2519	3388	0	649
Argonaute 2-PEb	GSSPFG00001770001.6-RA	88.76	267	30	0	1519	719	1999	1199	0	638
Argonaute 2-PEb	GSSPFG00001770001.6-RA	99.19	124	1	0	2684	2313	3164	2793	0	350
Argonaute 2-PEb	GSSPFG00001770001.6-RA	91.95	87	7	0	670	410	1150	890	0	207
Argonaute 2-PEb	GSSPFG00001770001.6-RA	100	66	0	0	350	153	830	633	0	193
Argonaute 2-PEb	GSSPFG00001770001.6-RA	93.22	59	4	0	354	178	834	658	0	167
Argonaute 2-PEb	GSSPFG00001770001.6-RA	94.12	68	4	0	152	355	632	835	0	151
Argonaute 2-PEb	GSSPFG00001770001.6-RA	92.16	51	4	0	195	347	675	827	0	145
Argonaute 2-PEb	GSSPFG00001770001.6-RA	100	49	0	0	1859	2005	2339	2485	0	129
Argonaute 2-PEb	GSSPFG00001770001.6-RA	94.44	36	2	0	331	224	811	704	0	104
Argonaute 2-PEb	GSSPFG00001770001.6-RA	86.36	44	6	0	3	134	483	614	0	99
Argonaute 2-PEb	GSSPFG00001770001.6-RA	92.5	40	3	0	187	68	667	548	0	92.6
Argonaute 2-PEb	GSSPFG00001770001.6-RA	94.12	34	2	0	2816	2715	3296	3195	0	86.1
Argonaute 2-PEb	GSSPFG00001770001.6-RA	78.38	37	8	0	2	112	482	592	0	84.1
Argonaute 2-PEb	GSSPFG00001770001.6-RA	100	27	0	0	181	261	661	741	0	80.2
Argonaute 2-PEb	GSSPFG00001770001.6-RA	100	15	0	0	307	351	787	831	0	47.5
Argonaute 2-PEb	GSSPFG00001770001.6-RA	87.5	32	4	0	96	1	576	481	0	44.6
Argonaute 2-PEb	GSSPFG00001770001.6-RA	100	9	0	0	95	69	575	549	0	32.2
Argonaute 2-PEb	GSSPFG00001770001.6-RA	100	11	0	0	2909	2877	3389	3357	0	31.2
Argonaute 2-PEb	GSSPFG00005772001.2-RA	55.81	86	38	0	2545	2802	256	513	3e-47	137
Argonaute 2-PEb	GSSPFG00005772001.2-RA	53.33	30	14	0	2350	2439	52	141	3e-47	49
Argonaute 2-PEb	GSSPFG00005772001.2-RA	72.22	18	5	0	2467	2520	166	219	3e-47	40.6
Argonaute 2-PEb	GSSPFG00005772001.2-RA	60	20	8	0	2429	2370	131	72	7e-10	35.6
Argonaute 2-PEb	GSSPFG00005772001.2-RA	51.28	39	19	0	2672	2556	383	267	7e-10	34.7
Argonaute 2-PEb	GSSPFG00005772001.2-RA	57.89	19	8	0	2519	2463	218	162	7e-10	29.2
Argonaute 2-PEb	GSSPFG00031765001.6-RA	41.35	104	61	0	2470	2781	2404	2715	4e-22	101
Argonaute 2-PEb	GSSPFG00031765001.6-RA	32.14	28	19	0	511	594	538	621	4e-22	29.2
Argonaute 2-PEb	GSSPFG00027554001.3-RA	31.72	145	99	0	1225	1659	1106	1540	9e-22	102
Argonaute 2-PEb	GSSPFG00027554001.3-RA	32.14	28	19	0	511	594	392	475	9e-22	26.2
Argonaute 2-PEb	GSSPFG00031425001.5-RA	40.51	79	47	0	2545	2781	2617	2853	3e-19	71.8
Argonaute 2-PEb	GSSPFG00031425001.5-RA	46.67	30	16	0	2341	2430	2419	2508	3e-19	43.1
Argonaute 2-PEb	GSSPFG00005884001.3-RA	39.24	79	48	0	2545	2781	2364	2600	2e-12	72.8
Argonaute 2-PEb	GSSPFG00033619001.2-RA	36.17	47	30	0	1948	2088	181	321	7e-11	44.6
Argonaute 2-PEb	GSSPFG00033619001.2-RA	40.48	42	25	0	2137	2262	367	492	7e-11	41.6
