# Supplementary material for: Identification and comparison of key RNA interference machinery from western corn rootworm, fall armyworm, and southern green stink bug
Source: PLoS One. 2018 Sep 5;13(9):e0203160. doi: 10.1371/journal.pone.0203160 (PMC6124762; doi:10.1371/journal.pone.0203160)
Supplement: S3 File — (XLSX) [file pone.0203160.s013.xlsx]

## Sheet: WCR
Count values for WCR core RNAi machinery transcripts
Sample			Raw count									Normalized count
Name	Replicate	Read depth	drosha-RA	dcr-1-PA	dcr-2-PA	pasha-RA	loqs-RB	loqs-RA	r2d2	ago1-RC	ago2-RBa	drosha-RA	dcr-1-PA	dcr-2-PA	pasha-RA	loqs-RB	loqs-RA	r2d2	ago1-RC	ago2-RBa
Early egg	1	13614684	209	295	115.18	103.15	6596.23	466.3	214	326.34	522.94	147.847	200.137	90.4024	83.0158	4016.67	101.261	150.891	218.353	317.227
	2	10241655	72	114	59.85	68.66	2836.12	676.04	315	89.56	205.79	87.4287	126.775	76.1027	84.6025	2649.57	93.4646	313.572	104.332	191.956
	3	16560776	289	414	182.05	145.75	9262.62	696.78	291	395.04	634.05	160.829	221.361	108.828	91.2385	4490.86	120.981	161.799	212.167	311.765
Mid egg	1	14627117	159	182	214	43.86	8899.08	628.99	515	58	528.5	130.555	146.478	168.599	49.9378	6142.74	102.782	376.047	59.978	366.409
	2	12145169	165	344	134.64	43.55	9945.84	375.98	357	47	598.04	137.424	263.902	116.135	50.6928	7026.06	56.1039	273.072	52.9064	411.95
	3	22110551	280	566	295	57.69	17133.5	649.91	416	139.61	1173.57	133.531	248.687	139.588	42.511	6894.81	69.7261	188.355	76.6889	484.409
Late egg	1	24495645	251	686	145	88.63	11621.8	303.23	259	110.1	1171.54	106.747	256.064	69.9212	50.0923	3993.56	92.9684	109.51	57.5862	367.61
	2	19667265	267	617	169.37	92.52	10233.1	291.45	177	207.44	1217.34	136.48	289.037	94.0463	60.3915	4455.5	44.6193	97.5594	110.707	490.69
	3	8044769	110	244	47	31.76	3967.45	141.67	90	62.38	424.36	142.241	290.054	72.1163	55.095	4385.05	112.046	120.086	88.9343	414.46
	4	16662434	143	496	72	47.88	6486	153.04	256	45.74	724.3	94.1733	276.098	56.9034	43.9598	3348.52	53.0028	152.633	42.8626	358.784
Neonate	1	9208415	36	81	7	4.72	961.28	22.84	66	7	59	81.3534	158.003	29.83	25.8185	1643.35	63.3047	132.547	29.83	86.5042
	2	11611190	92	119	43	15.57	2675.13	141.26	93	62.99	246.4	121.452	151.097	67.1981	36.1912	2939.52	149.406	122.552	89.4639	274.703
	3	11467965	44	108	22.59	17.94	1719.07	57.82	116	9.8	140.27	73.5807	151.705	47.3034	40.8589	2096.23	107.215	161.412	30.1349	162.625
First & second instar larva	1	9696960	86	152	49	21.22	3436.03	200.68	92	41.71	344.48	110.393	179.413	71.332	40.9599	3593.11	73.2906	116.688	63.8561	349.15
	2	10204051	105	173	95.56	40.26	4703.7	311.47	109	63	443.14	119.653	183.836	111.127	57.5398	4436.39	39.8274	123.439	78.7622	414.166
	3	12961868	105	233	96.07	28.28	5416.56	465.41	119	63.71	505.21	100.947	199.113	93.9967	40.4394	4151.24	96.6729	111.735	69.1364	378.535
Third instar larva	1	8889009	0	23	5	5.97	30.77	38.76	34	0	15	11.0607	104.005	36.8587	40.7899	133.153	81.6724	144.056	11.0607	59.7998
	2	7258353	4	50	1	1.52	173.83	12.11	43	0	29	30.0348	171.24	18.508	22.7332	543.314	47.1535	150.163	11.0607	92.7217
	3	7878868	4	34	3	6.32	88.16	11.85	35	1	5.72	30.0958	123.465	26.5416	36.8616	286.56	67.5116	126.499	18.5285	56.0572
Mid pupa	1	13901316	92	264	64	26.87	3228.11	97.24	119	72.97	439.32	97.0675	240.292	73.4694	41.5414	2694.27	160.971	119.67	81.0807	364.715
	2	11135486	94	317	45	35.38	3435.69	86.99	140	51	469.25	99.3882	286.415	57.5752	48.8446	2891.42	130.743	138.147	62.7613	370.02
	3	7208851	50	152	42	14.54	1945.07	69.72	61	43	268.66	92.1301	238.471	80.5249	40.5018	2797.07	142.574	108.019	81.9785	382.765
Late pupa	1	10991929	89	175	51.64	35.01	2055.1	75.49	93	38.67	413.67	117.115	212.53	77.2883	58.2169	2264.77	209.674	122.618	62.7336	438.735
	2	11832568	68	206	66	34.96	2584.77	38.26	122	24.46	414.4	85.4017	217.601	83.4652	53.1267	2482.11	74.3471	137.333	42.052	371.051
Unmated male	1	10559450	70	113	85	12.48	2054.22	82.74	69	17.97	535.56	97.6293	145.193	114.26	31.3821	2274.45	62.19	96.5183	38.6987	554.841
	2	10804335	37	88	15	5.26	767.56	27.52	116	5	140	64.0695	125.456	36.5548	22.6459	932.331	71.6205	158.851	22.6459	163.614
	3	23297672	156	181	190	40.62	3715.05	76.25	159	40	982.23	109.505	123.817	128.391	42.5029	2129.63	56.9828	111.224	41.8937	535.31
Mated male	1	8958031	40	93	48	12.49	1489.48	53.73	44	12.08	285.21	75.2525	151.89	88.1261	35.526	2111.24	124.682	82.4138	35.526	405.116
	2	8856770	57	86	37	10.89	1601.15	46.29	63	8.17	235.58	96.5012	135.352	69.4648	33.0145	2146.83	147.814	104.562	28.4364	315.033
	3	13809440	64	109	50	18.14	1669.71	27.9	93	15	301.92	83.8081	128.717	69.6993	36.5326	1669.77	177.606	112.796	33.241	286.119
	4	14303140	51	99	44	8.93	1632.67	46.74	103	12	261.98	71.633	120.532	64.4114	26.5528	1662.07	99.3707	124.583	30.11	268.725
Late mated male	1	15082528	72	118	81	27.39	2517.94	61.27	115	21	483.59	84.255	125.355	91.4341	43.1295	2245.8	454.52	122.685	37.3958	412.169
	2	16097698	51	124	39	12.16	1891.81	51.01	125	16.33	265.51	62.19	123.334	51.9096	27.5757	1581.49	286.473	124.165	31.4148	224.337
	3	13755459	35	124	29	13.13	1483.29	50.74	89	5	188.98	55.041	145.786	48.7287	31.2608	1511.07	282.444	110.375	21.4341	183.108
	4	18219088	80	152	69	32.13	2559.09	54.48	164	28	424.31	75.3244	125.317	67.6	41.0738	1775.83	303.889	133.601	38.0999	295.157
Unmated female	1	18163875	97	151	26	27.19	1781.01	66.51	211	13.08	215.14	92.2557	132.44	38.0615	38.8647	1333.36	648.233	176.875	27.201	170.217
	2	6068738	59	50	36.64	8.55	1189.66	35.59	44	17	146.05	139.511	121.339	95.0011	36.8415	2407.45	358.144	109.2	53.9299	278.261
	3	10177106	39	87	30	12.06	1213.1	18.77	93	4.9	157.67	72.2355	136.798	58.5559	34.5181	1633.4	162.207	144.818	23.5738	202.179
Mated female	1	12006888	65	119	66	27.89	3311.77	139.54	133	17	366.29	80.0703	130.069	81.0029	45.0251	3052.65	55.8925	142.964	34.088	355.762
	2	11894927	55	115	52	9.81	2117.82	79.65	94	19.62	260.5	79.876	145.241	76.5762	28.6272	2305.12	56.0572	122.448	40.6721	262.033
	3	9165328	46	88	24.01	10.83	1774.34	38.36	78	14.74	202.38	84.6383	143.632	53.1932	33.797	2488.79	58.8459	129.636	39.9136	267.78
Pregnant female	1	21763333	175	272	155.55	59.31	7059.77	263	280	70.44	895.84	113.944	165.77	103.752	51.0439	3769.78	175.202	170.036	57.1388	479.976
	2	15892786	91	201	69	38.31	4237.76	152.02	205	34	414.84	86.2938	166.26	70.1096	46.9023	3075.98	90.7984	169.156	43.8369	286.217
	3	16439086	115	209	76.93	34.07	5295.42	194.66	249	56	589.62	92.3388	151.333	68.2306	40.2322	3316.13	230.49	176.332	54.7238	368.302
	4	17363982	113	200	310	53.05	5691.06	291.44	265	45.74	1562.99	93.6209	150.167	221.302	54.0041	3688.17	314.58	192.225	49.2767	931.1

## Sheet: FAW
Count values for FAW core RNAi machinery transcripts
Sample			Raw count									Normalized count
Name	Replicate	Read depth	drosha-RA	dcr-1-PA	dcr-2-PA	pasha-RA	pasha-RB	loqs-RBa	loqs-RA	ago1-RC	ago2-RE	drosha-RA	dcr-1-PA	dcr-2-PA	pasha-RA	pasha-RB	loqs-RBa	loqs-RA	ago1-RC	ago2-RE
Early egg	1	18312949	1443.66	341	1640.73	426	46.59	2177.49	0	4784.64	1481.61	945.017	234.692	1071.86	289.465	44.3234	1416.96	7.70087	3096.07	958.539
	2	14312530	1056.68	247	1277.84	297.25	51.63	1488.06	0	3857.11	1137.02	1437.23	347.494	1734.52	414.781	84.6512	2017.02	7.70087	5203.8	1526.01
	3	19623894	1419.26	457	1956.64	153.48	24.41	2646.36	49.99	4761.67	1729.06	1699.88	557.807	2338.56	196.729	42.497	3156.49	73.9555	5668.43	2047.71
	4	15065641	1093.83	301	1421.29	207.98	24.12	1742.93	0	3679.81	1093.75	2445.89	684.039	3172.38	477.386	67.8479	3887.77	7.70087	8191.16	2437
Late egg	1	14896211	403.14	59	424.22	85.82	16.77	1044.4	21.91	2079.14	1419.98	445.491	77.6232	467.916	106.655	31.678	1129.87	37.2978	2234.81	1513.14
	2	14741195	394.15	56	307.89	121.61	31.64	984.87	0	1775.54	1352.54	696.714	111.719	544.5	226.131	69.8952	1718.86	7.70087	3086.86	2324.17
	3	17166838	451.88	68	399.5	95.94	0	1066.51	26.43	2056.65	1550.38	1085.24	176.022	962.148	242.391	7.70087	2540.99	76.1656	4884.35	3660.6
	4	15338984	336.24	17	312.58	133.79	8.82	998.05	83.52	1576.5	1065.16	1970.24	113.787	1836.42	777.49	66.8774	5821.8	504	9190.46	6141.8
First instar larva	1	19354416	581.66	85	431.6	101.57	16.74	3184.61	0	1391.44	1506.19	1118.9	176.236	834.459	208.523	46.3567	6054.57	7.70087	2652.9	2855.78
	2	17390093	518.43	95	373.77	84.63	8.53	3139.24	23.32	1358.02	1320.49	212.726	50.4666	157.696	46.553	14.8384	1212.8	21.4051	533.331	514.634
	3	21224456	639.43	115	480.27	122.29	16.21	3799.27	45.74	1748.3	1390.84	639.311	127.236	484.013	134.096	28.9798	3725.22	59.3224	1722.34	1365.9
	4	26755016	705.88	106	476.68	155.87	16.45	4747.85	216.17	1872.77	2127.77	611.628	104.366	418.158	146.763	26.6946	4025.79	197.546	1597.39	1797.58
Third instar larva	1	19063839	518.6	186	2283.62	128.05	32.9	2675.12	171.7	1883.04	4790.95	562.403	211.194	2420.96	149.938	48.9781	2835.25	196.415	2000.35	5009.98
	2	21891866	709	194	2598.29	200.58	43.67	3604.83	150.84	2008.18	5131.31	1303.48	367.702	4735.47	380.425	94.7153	6565	289.535	3663.54	9235.72
	3	15453728	504.67	139	1690.08	75.11	25.75	2412.67	24.11	1425.05	3516.81	1017.16	290.945	3366.01	163.824	66.0829	4802.28	62.0571	2842.28	6915.02
	4	22938319	631.99	181	2427.74	82.98	8.43	3508.78	69.66	2036.69	5445.63	1252.23	369.473	4767.19	177.506	29.0145	6882.8	152.007	4001.96	10569.9
Sixth instar larva	1	17122329	350.27	47	1420.44	45.93	45.4	1577.01	101.6	709.1	3310.44	511.486	81.305	2028.53	79.8742	78.443	2251.11	159.637	1020.5	4679.68
	2	19684611	351.09	82	1561.56	69.1	8.04	1423.11	197.64	723.64	3881.6	605.664	152.933	2642.57	131.003	26.6303	2408.77	348.255	1233.08	6494.21
	3	20333504	357.19	82	1841.51	36.03	8.37	1550.19	93.53	767.28	4093.71	397.07	102.524	1985.42	52.7808	21.1545	1673.12	115.422	835.65	4348
	4	19097093	321.31	76	1602.15	27.38	8.64	1467.94	135.06	704.23	3608.98	156.475	47.6474	720.819	24.9198	15.5553	662.204	74.0907	325.445	1591.17
Male pupa	1	13183251	189.79	13	468.95	4.09	3.33	1616.86	87.79	122.05	1387.8	38.5559	12.2502	75.568	9.9784	9.63948	225.283	24.4086	29.2278	194.701
	2	11588121	152.08	6	351.78	17.53	0	1710.44	94.8	266.16	1203.45	78.2682	13.5302	161.538	19.966	7.70087	731.093	54.0701	126.274	516.746
	3	12413132	203.68	16	472.62	28.05	0	1502.45	83.24	388.69	1417.11	52.5061	14.2342	103.479	17.2021	7.70087	296.708	28.9061	87.6316	279.453
	4	12651673	178.11	15	507.99	1.26	7.35	1930.72	60.6	266.99	1323.25	40.3916	13.1067	90.2542	8.84766	11.0992	302.231	21.7411	53.9904	210.434
Female pupa	1	16305951	289.49	21	988.88	71.39	6.06	2555.6	136.73	583.24	2588.02	127.534	20.7217	400.579	41.64	13.2706	1011.19	67.9052	242.3	1018.59
	2	11384089	144.13	6	588.21	0.94	3.53	1993.57	115.57	433.04	1570.13	38.4678	11.0699	115.369	8.93665	10.3623	355.983	33.4518	88.7273	282.972
	3	14173313	234.34	9	657.49	46.62	0	2242.98	171.67	685.21	2081.07	83.3782	13.7217	207.97	27.0017	7.70087	673.717	64.9774	216.2	622.047
	4	12224474	221.17	14	735.46	28.06	0	2198.65	27.72	567.96	1823.43	100.702	17.4428	300.856	23.791	7.70087	869.955	23.791	235.898	720.314
Unmated male	1	18708724	441.85	79	2309.74	44.96	19.88	897.76	46.09	1158.43	4600.81	504.329	102.23	2571.24	64.2686	35.8775	1008.92	65.3908	1296.61	5060.73
	2	17303242	415.55	62	2004.2	48.47	0	931.43	62.19	1109.43	4765.83	1199.71	191.606	5720.79	151.667	7.70087	2665.94	191.606	3172.71	13467.5
	3	17844687	392.63	89	2128.78	33.53	8.02	1026.46	24.8	1140.93	4807.17	437.614	110.511	2303.36	50.7728	21.2021	1117.97	40.8157	1241.56	5138.38
	4	17941033	470.41	62	2382.11	38.18	20.27	966.37	59.48	962.69	4651.6	321.205	54.6816	1566.14	38.605	26.1551	644.213	52.6874	642.26	3015.37
Unmated female	1	22509878	1065.27	165	1825.83	311.98	24.59	6714.65	48.22	2199.11	4129.15	1676.64	272.565	2863.73	501.968	53.2859	10490	89.6144	3445.57	6392.2
	2	16595066	818.93	138	1303.27	183.71	15.89	4407.22	21.48	1729.84	2741.96	2632.5	456.252	4179.14	603.278	65.6263	14098	81.7823	5543.63	8691.21
	3	12957149	632.77	126	902.73	219.18	7.74	3081.68	44.49	1344.37	1966.31	1337.51	278.366	1901.47	472.703	30.1441	6452.79	106.749	2822.6	4080.01
	4	13500257	653.03	123	951.73	180.4	7.75	3624.18	44.09	1427.81	2029.49	1129.48	224.997	1639.64	322.328	26.8417	6198.55	89.8129	2451.79	3444.79
Pregnant female	1	14727261	730.28	116	1098.34	177.04	0	3381.45	0	1188.29	2127.45	608.396	109.103	907.411	158.833	7.70087	2762.29	7.70087	980.537	1719.9
	2	12507766	758.22	111	1193.52	174.7	14.66	2779.86	0	1045.36	1959.7	1290.26	201.803	2023.6	309.549	39.1146	4691.17	7.70087	1772.99	3273.3
	3	15757026	1012.81	138	1229.57	192.06	8.37	4676.5	0	1194.25	2457.92	2187.96	311.181	2653.37	427.047	30.6228	10044	7.70087	2576.16	5224.89

## Sheet: SGSB
Count values for SGSB core RNAi machinery transcripts
Sample			Raw count								Normalized count
Name	Replicate	Read depth	drosha-RA	dcr-1-PA	dcr-2-PA	pasha-RAa	loqs-RA	r2d2	ago1-RC	ago2-RB	drosha-RA	dcr-1-PA	dcr-2-PA	pasha-RAa	loqs-RB	loqs-RA	r2d2	ago1-RC	ago2-RB
Early egg	1	10689561	382.59	676.98	1472	307.11	636.55	107.16	721	354.29	377.301	558.432	1334.59	330.243	342.259	326.237	117.405	637.466	336.251
	2	13073509	380	806.52	1808	499.11	761.94	114.4	871	366.5	397.321	753.502	1741.62	476.385	468.379	374.297	131.545	791.512	372.295
	3	12297634	369.42	674.17	1688	259.72	729.94	101.11	870	456.94	363.021	639.388	1521.97	317.732	421.781	375.545	122.579	895.433	428.523
	4	12401728	385.26	797.01	1585	182.9	685.04	109.5	856	478.62	358.279	731.496	1442.6	195.926	399.323	349.268	128.518	825.52	442.36
Late egg	1	10908922	176.79	260.35	968	89.95	419.81	154.15	296	174.92	183.319	285.082	994.61	106.903	245.972	264.971	181.079	345.386	190.039
	2	10228831	192.65	295.31	1367	118.97	418.07	138.37	373	211.98	211.762	280.221	1235.6	159.309	225.865	248.017	159.309	357.659	215.792
	3	12198524	136	192.12	634	96.08	327.96	161.82	333	107.25	168.975	195.492	744.865	99.0502	201.013	216.464	161.233	328.884	141.303
	4	9333290	116.1	196.01	568	82	300.33	111.96	245	83.59	166.22	260.09	682.438	115.863	173.7	246.239	153.388	297.366	124.458
First instar nymph	1	14120145	279.69	525.11	1991	101.21	633.54	134.91	866	395.33	353.273	555.43	2063.63	119.427	395.319	345.263	164.779	795.513	446.363
	2	11144786	258.62	339.94	1590	128.15	485.28	129.68	540	295.49	290.179	395.319	1717.62	139.612	336.251	282.164	156.731	586.445	338.254
	3	15977457	332.47	482.16	2191	126.16	597.71	181.27	603.99	449.37	314.219	501.401	2195.64	154.719	419.341	341.258	206.968	660.474	458.372
	4	16587990	308.72	555.19	2584	89.36	729.65	174.92	856	477.42	300.197	495.397	2193.63	111.334	384.308	376.299	194.922	753.502	426.347
Second instar nymph	1	11259690	126.65	207.44	796	69.84	261.38	114.83	279	302.14	151.699	230.042	875.53	91.0287	165.785	176.842	129.527	329.242	337.252
	2	10079774	121.37	124.28	676	76.94	228.83	88.22	314	247.27	147.672	180.861	785.511	87.9705	181.866	171.817	126.499	351.271	306.207
	3	11485999	134.58	171.48	846	103.45	288.48	114.56	268	323.1	124.903	184.544	829.857	82.0916	146.168	199.669	122.875	268.146	306.376
	4	8498395	50.14	112.66	524	26.78	178.12	93.91	159	196.65	80.0089	142.292	600.799	50.2755	129.473	131.611	121.984	183.854	243.387
Third instar nymph	1	8202160	129.3	129.52	824	21.72	226.7	104.43	278	187.29	169.769	203.367	1161.87	43.4969	127.916	237.94	136.097	420.672	274.516
	2	8493289	97.63	108.79	961	44	202.5	90.51	215	216.59	154.256	164.359	1086.96	94.3836	129.972	180.508	138.074	323.473	275.19
	3	9087628	150.42	134.29	811	26.68	180.9	115.92	284	219	147.672	148.679	740.499	50.6951	98.1504	141.628	141.628	304.203	213.992
	4	7111558	113.47	103.23	739	73.36	148.99	105.63	216	207.37	148.695	164.687	1069.19	74.5725	115.558	141.225	136.953	285.859	306.024
Fifth instar nymph	1	9527355	124.02	137.12	1507	85.9	305.58	106.21	296	366.2	183.854	197.685	1796.04	132.68	158.293	291.166	154.028	371.798	475.716
	2	11000675	182.08	172.47	1973	70.39	332.94	116.5	329	491.42	221.075	212.572	2194.42	102.679	185.982	269.935	156.161	373.92	574.301
	3	12209878	221	196.2	1856	62.15	320.42	125.78	426	482.08	256.042	214.268	1884.59	96.3034	179.226	241.369	157.718	453.332	507.411
	4	27754064	382.53	419.1	4380	169.47	811.21	310.08	788	950.35	402.326	390.314	4010.67	194.922	313.218	559.432	329.242	667.476	916.538
Unmated male	1	14320293	139.82	194.43	1951	84.25	253.45	127.87	339	504.15	152.962	190.239	1899.87	105.902	134.817	185.982	140.157	335.733	496.918
	2	18722490	163.55	215.42	2515	121.46	263.8	120.8	353	604.09	207.731	251.037	2777.05	153.246	162.339	204.708	145.157	400.884	691.246
	3	13543838	118.71	128.37	1730	13.94	178.56	147.92	247	481.8	169.407	175.463	1831.1	43.2701	114.754	146.168	208.739	320.456	554.626
	4	16969002	155.64	238.35	1971	51.01	307.44	166.23	317	721.66	187.893	253.102	1996.63	82.8636	166.79	222.018	187.893	357.278	748.501
Unmated female	1	16143240	247.97	213.86	2066	113.86	362.14	172.72	316	568.78	273.146	267.134	2229.64	155.725	206.968	275.15	207.971	406.329	626.461
	2	17320642	195.21	213.85	2069	115.38	420.86	172.78	352	571.91	249.092	256.109	2218.64	113.359	213.992	288.176	200.946	352.272	641.467
	3	17350716	203.14	224.9	2353	85.61	421.65	100.11	340	672.89	237.061	263.125	2178.63	132.554	202.953	307.208	145.657	365.287	671.478
	4	16550778	218.97	215.45	1906	61.58	423.69	173.72	395	717.61	297.192	299.195	2351.64	90.0098	215.999	375.298	225.027	482.389	932.541
Pregnant female	1	18412922	203.13	244.7	3157	84.72	448.76	147.84	411	881.99	242.434	287.675	3040.74	160.227	296.088	287.675	204.525	508.364	894.82
	2	14309160	145.09	175.2	2203	151.59	336.55	182.86	270	535.26	177.467	221.075	2352.28	207.256	248.698	218.949	233.826	337.854	591.26
	3	18179543	187.31	296.21	2828	101.15	470.04	172.81	541	892.14	184.88	258.114	2336.64	123.469	240.069	255.107	186.889	459.373	753.502
	4	20388610	234.77	316.26	3133	123.26	481.39	262.51	638	1097.62	255.107	318.226	3055.65	134.571	278.156	286.172	273.146	619.459	1076.56

## Sheet: Dme
Count values for D. melanogaster core RNAi machinery transcripts
Sample	Normalized count
Name	drosha	dcr-1	dcr-2	pasha	loqs	r2d2	ago1	ago2
em0-2hr	25	22	21	22	18	39	44	47
em2-4hr	32	8	18	29	26	46	63	73
em4-6hr	27	17	12	15	14	25	53	81
em6-8hr	18	16	14	12	20	31	55	70
em8-10hr	19	12	15	12	25	36	53	69
em10-12hr	14	7	8	10	38	40	38	59
em12-14hr	15	8	14	10	27	32	58	76
em14-16hr	9	5	7	7	23	17	47	61
em16-18hr	7	3	7	7	20	17	43	63
em18-20hr	4	2	4	4	18	10	31	56
em20-22hr	4	2	10	8	17	13	36	51
em22-24hr	5	2	10	8	14	14	40	55
L1	7	4	4	4	11	10	23	30
L2	6	4	5	4	7	15	15	30
L3_12hr	6	5	6	3	6	12	10	33
L3_PS1-2	5	4	9	3	10	12	7	58
L3_PS3-6	6	6	16	5	17	16	23	88
L3_PS7-9	7	6	21	6	20	21	33	89
WPP	7	6	21	6	19	19	37	92
P5	7	6	24	12	30	19	30	78
P6	10	8	22	10	41	24	38	79
P8	7	4	9	7	40	19	36	63
P9-10	4	2	5	4	30	13	22	55
P15	3	2	4	3	26	7	13	33
AdM_Ecl_1days	4	3	8	4	40	12	16	50
AdM_Ecl_5days	4	4	7	5	58	13	15	49
AdM_Ecl_30days	5	4	7	4	57	12	16	56
AdF_Ecl_1days	10	8	11	6	10	14	23	56
AdF_Ecl_5days	17	14	22	13	13	26	29	65
AdF_Ecl_30days	18	15	21	12	14	26	28	58
References:	Graveley, B.R., Brooks, A.N., Carlson, J.W., Cherbas, L., Choi, J., Davis, C.A., Dobin, A., Duff, M., Eads, B., Hansen, K.D., Landolin, J., Langton, L., Malone, J., Miller, D., Roberts, J., Sandler, J., Sturgill, D., Tang, H., van Baren, M.J., Wan, K.H., Xiao, S., Yang, L., Zhang, D., Zhang, Y., Zou, Y., Andrews, J., Brenner, S.E., Brent, M., Cherbas, P., Dudoit, S., Gingeras, T.R., Hoskins, R., …
	Graveley, B.R., Brooks, A.N., Carlson, J.W., Duff, M.O., Landolin, J.M., Yang, L., Artieri, C.G., van Baren, M.J., Boley, N., Booth, B.W., Brown, J.B., Cherbas, L., Davis, C.A., Dobin, A., Li, R., Lin, W., Malone, J.H., Mattiuzzo, N.R., Miller, D., Sturgill, D., Tuch, B.B., Zaleski, C., Zhang, D., Blanchette, M., Dudoit, S., Eads, B., Green, R.E., Hammonds, A., Jiang, L., Kapranov, P., Langton, L…
Data source:	/data/build-public-release/fb_2016_05_reporting/bulk_reports/flat_transcriptome_fb_2016_05_reporting.gff
	/data/build-public-release/fb_2016_05_reporting/bulk_reports/flat_transcriptome_unstranded_fb_2016_05_reporting.gff
